# Supplementary material for: Regional tropical cyclone impact functions for globally consistent risk assessments
Source: Copernicus journal article supplement (doi:10.5194/nhess-21-393-2021), 2021-01-29
Supplement: Supplementary file 1 [file nhess-21-393-2021-supplement.zip]

Archive with 7 entries (7 files):
- Table_S3_region_and_AAD_per_country.csv
- Table_S1_TC_matched_event_assignment.csv
- supplement-Figures_S1-S4.pdf
- Table_S2_V_half_individual_fitting_per_event.csv
- nhess-21-393-2021-supplement-title-page.pdf
- README_Supplement_Tables.txt
- Table_S4_matched_events_WP2_Philippines.csv
