# Supplementary material for: Regional tropical cyclone impact functions for globally consistent risk assessments
Source: Copernicus journal article supplement (doi:10.5194/nhess-21-393-2021), 2021-01-29
Supplement: Supplementary file 1 [file nhess-21-393-2021-supplement.zip › nhess-21-393-2021-supplement-title-page.pdf]

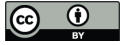

## *Supplement of*

# **Regional tropical cyclone impact functions for globally consistent risk assessments**

**Samuel Eberenz et al.**

*Correspondence to:* Samuel Eberenz (eberenz@posteo.eu)

- nhess-21-393-2021-supplement-title-page.pdf
- README\_Supplement\_Tables.txt
- Table\_S1\_TC\_matched\_event\_assignment.csv
- Table\_S2\_V\_half\_individual\_fitting\_per\_event.csv
- Table\_S3\_region\_and\_AAD\_per\_country.csv
- Table\_S4\_matched\_events\_WP2\_Philippines.csv
- supplement-Figures\_S1-S4.pdf

The copyright of individual parts of the supplement might differ from the CC BY 4.0 License.
