# Supplementary material for: Regional tropical cyclone impact functions for globally consistent risk assessments
Source: Copernicus journal article supplement (doi:10.5194/nhess-21-393-2021), 2021-01-29
Supplement: Supplementary file 1 [file nhess-21-393-2021-supplement.zip › README_Supplement_Tables.txt]

"Regional tropical cyclone impact functions for globally consistent risk assessments"

SUPPLEMENTARY TABLES

Authors:
Samuel Eberenz 1,2, Samuel Lüthi 1,2, David N. Bresch 1,2

1 Institute for Environmental Decisions, ETH Zurich, Zurich, 8092, Switzerland
2 Federal Office of Meteorology and Climatology MeteoSwiss, Zurich-Airport, 8058, Switzerland

Correspondence to: Samuel Eberenz (eberenz@posteo.eu)

CONTENT OF SUPPLEMENTARY MATERIAL

Table S1: Table_S1_TC_matched_event_assignment.csv
Table S2: Table_S2_V_half_individual_fitting_per_event.csv
Table S3: Table_S3_region_and_AAD_per_country.csv
Table S4: Table_S4_matched_events_WP2_Philippines.csv


DETAILS

[Please refer to the manuscript for references and detailed information]


Table S1: TC event assignment between IBTrACs and EM-DAT.
country: alphabetical ISO3 code of affected country;
Date_start_EM: Start date of event in EM-DAT;
Disaster_name: Event name in EM-DAT;
EM_ID: event ID from EM-DAT;
ibtracsID: assigned event ID from IBTrACs;
allocation_level: certainty of assignment. Low:0, high:15.
checked_manually: has the match been checked manually (yes/)

Table S2: Best fitting V_half per event.
EM_ID: event ID from EM-DAT;
ibtracsID: event ID from IBTrACS;
v_half_fitted [m/s]: Impact function shape parameter V_half fitted for event
country: alphabetical ISO3 code of affected country;
country_id: numerical ISO3 code of affected country;
region: calibration region;
year: year of impact;
Reported_Damage [USD]: Reported total damage from EM-DAT in current USD;
reference_year: Reference year for normalization;
Normalized_Reported_Damage [USD]: Reported damage normalized to reference year;
Simulated_Damage [USD]: Event damage simulated with CLIMADA and V_half = v_half_fitted;	log_ratio: logarithm of Simulated_Damage divided by Normalized_Reported_Damage;
unique_ID: Unique event ID.

Table S3: Calibration region and AAD value per country.
List of countries
country_id: numerical ISO3 code of affected country;
alpha3:  alphabetical ISO3 code of affected country;
name: country name;
used_for_calibration: is this country used for calibration? yes/no;
Region: calibration region;
AAD: Annual expected damage [mio. USD];
TAV: Total asset value [mio. USD];
EMDAT: based on normalized reported damage data from EM-DAT;
GAR2013: extracted from Global Assessment Report 2013;
defaultIF: simulated with CLIMADA using V_half=74.7m/s;
RMSF_optimized: simulated with CLIMADA using RMSF optimized regional V_half;
TDR_optimized: simulated with CLIMADA using TDR optimized regional V_half.


Table S4: List of matched TC events for the Philippines.
EM_ID: event ID from EM-DAT;
ibtracsID: event ID from IBTrACS;
v_half: Impact function shape parameter V_half [m/s] used for damage simulation;
country: alphabetical ISO3 code of affected country;
country_id: numerical ISO3 code of affected country;
region: calibration region;
name: event name according to EM-DAT; 
year: year of impact;
Reported_Damage [USD]: Reported total damage from EM-DAT in current USD;
reference_year: Reference year for normalization;
Normalized_Reported_Damage [USD]: Reported damage normalized to reference year;
Simulated_Damage [USD]: Event damage simulated with CLIMADA and V_half = v_half_fitted;
Event_Damage_Ratio (EDR): Simulated_Damage divided by Normalized_Reported_Damage;log_ratio: logarithm of Simulated_Damage divided by Normalized_Reported_Damage;
unique_ID: Unique event ID;
Surge/Raim/Flood/Slide: Associated disaster listed in EM-DAT (TRUE/FALSE).
