# Supplementary material for: Regional tropical cyclone impact functions for globally consistent risk assessments
Source: Copernicus journal article supplement (doi:10.5194/nhess-21-393-2021), 2021-01-29
Supplement: Supplementary file 1 [file nhess-21-393-2021-supplement.zip › Table_S1_TC_matched_event_assignment.csv]

country	Date_start_EM	Disaster_name	EM_ID	ibtracsID	allocation_level	checked_manually
IND	02.12.17	Cyclone 'Ockhi'	2017-0508	2017333N06082	1
LKA	29.11.17	Cyclone 'Ockhi'	2017-0508	2017333N06082	1
IDN	28.11.17	Cyclone 'Cempaka'	2017-0515	2017325S10112	15	yes
VNM	04.11.17	Typhoon 'Damrey' / 'Ramil'	2017-0422	2017304N11127	7	yes
PHL	01.11.17	Typhoon 'Damrey' / 'Ramil'	2017-0422	2017304N11127	7	yes
JPN	22.10.17	Typhoon 'Lan'/'Paolo'	2017-0432	2017288N09138	15	yes
PHL	18.10.17	Typhoon 'Lan'/'Paolo'	2017-0432	2017288N09138	5	yes
USA	07.10.17	Tropical depression'16/Hurricane 'Nate'	2017-0410	2017277N11279	4	yes
PAN	06.10.17	Tropical depression'16/Hurricane 'Nate'	2017-0410	2017277N11279	0	yes
SLV	05.10.17	Tropical depression'16/Hurricane 'Nate'	2017-0410	2017277N11279	0	yes
GTM	05.10.17	Tropical depression'16/Hurricane 'Nate'	2017-0410	2017277N11279	0	yes
HND	05.10.17	Tropical depression'16/Hurricane 'Nate'	2017-0410	2017277N11279	1	yes
NIC	05.10.17	Tropical depression'16/Hurricane 'Nate'	2017-0410	2017277N11279	1	yes
COL	04.10.17	Tropical depression'16/Hurricane 'Nate'	2017-0410	2017277N11279	0	yes
USA	26.09.17	Hurricane 'Maria'	2017-0383	2017260N12310	0	yes
REU	27.01.80	Hyacinthe	1980-0029	N/A	0
CRI	21.09.17	Tropical depression'16/Hurricane 'Nate'	2017-0410	2017277N11279	0	yes
HTI	21.09.17	Hurricane 'Maria'	2017-0383	2017260N12310	0	yes
DOM	20.09.17	Hurricane 'Maria'	2017-0383	2017260N12310	7	yes
GLP	20.09.17	Hurricane 'Maria'	2017-0383	2017260N12310	0	yes
PRI	20.09.17	Hurricane 'Maria'	2017-0383	2017260N12310	7	yes
VGB	20.09.17	Hurricane 'Maria'	2017-0383	2017260N12310	10	yes
VIR	20.09.17	Hurricane 'Maria'	2017-0383	2017260N12310	7	yes
DMA	18.09.17	Hurricane 'Maria'	2017-0383	2017260N12310	10	yes
MTQ	18.09.17	Hurricane 'Maria'	2017-0383	2017260N12310	0	yes
JPN	17.09.17	Typhoon 'Talim'	2017-0468	2017252N14147	8
THA	17.09.17	Typhoon 'Doksuri'	2017-0406	2017253N14130	2	yes
VNM	15.09.17	Typhoon 'Doksuri'	2017-0406	2017253N14130	2	yes
PHL	11.09.17	Typhoon 'Doksuri'	2017-0406	2017253N14130	15	yes
USA	10.09.17	Hurricane 'Irma'	2017-0381	2017242N16333	9	yes
BHS	08.09.17	Hurricane 'Irma'	2017-0381	2017242N16333	2	yes
BRB	08.09.17	Hurricane 'Irma'	2017-0381	2017242N16333	0	yes
CUB	08.09.17	Hurricane 'Irma'	2017-0381	2017242N16333	2	yes
BLM	08.09.17	Hurricane 'Irma'	2017-0381	2017242N16333	15	yes
MAF	08.09.17	Hurricane 'Irma'	2017-0381	2017242N16333	15	yes
SXM	08.09.17	Hurricane 'Irma'	2017-0381	2017242N16333	15	yes
TCA	08.09.17	Hurricane 'Irma'	2017-0381	2017242N16333	2	yes
VGB	08.09.17	Hurricane 'Irma'	2017-0381	2017242N16333	15	yes
HTI	07.09.17	Hurricane 'Irma'	2017-0381	2017242N16333	2	yes
MEX	07.09.17	Hurricane Katia	2017-0392	2017249N22263	15
VIR	07.09.17	Hurricane 'Irma'	2017-0381	2017242N16333	2	yes
AIA	06.09.17	Hurricane 'Irma'	2017-0381	2017242N16333	15	yes
ATG	06.09.17	Hurricane 'Irma'	2017-0381	2017242N16333	15	yes
DOM	06.09.17	Hurricane 'Irma'	2017-0381	2017242N16333	2	yes
PRI	06.09.17	Hurricane 'Irma'	2017-0381	2017242N16333	2	yes
KNA	06.09.17	Hurricane 'Irma'	2017-0381	2017242N16333	15	yes
MEX	30.08.17	Tropical storm 'Lidia'	2017-0376	2017242N17253	13
CHN	27.08.17	Tropical storm 'Pakhar'/'Jolina'	2017-0485	2017236N15129	15
HKG	27.08.17	Tropical storm 'Pakhar'/'Jolina'	2017-0485	2017236N15129	15
MAC	27.08.17	Tropical storm 'Pakhar'/'Jolina'	2017-0485	2017236N15129	15
PHL	25.08.17	Tropical storm 'Pakhar'/'Jolina'	2017-0485	2017236N15129	15
USA	25.08.17	Hurricane Harvey	2017-0362	2017228N14314	8
CHN	24.08.17	Typhoon 'Hato'	2017-0352	2017232N19130	0	yes
HKG	24.08.17	Typhoon 'Hato'	2017-0352	2017232N19130	0	yes
MAC	24.08.17	Typhoon 'Hato'	2017-0352	2017232N19130	0	yes
VNM	24.08.17	Typhoon 'Hato'	2017-0352	2017232N19130	0	yes
MEX	07.08.17	Hurricane 'Franklin'	2017-0334	2017219N16279	10
JPN	05.08.17	Typhoon 'Noru'	2017-0327	﻿2017200N26162	12	yes
CHN	03.08.17	Typhoon Nesat & Haitang	2017-0326	N/A	0	yes
TWN	29.07.17	Typhoon Nesat & Haitang	2017-0326	N/A	0	yes
PHL	25.07.17	Typhoon Nesat & Haitang	2017-0326	N/A	1	yes
LAO	17.07.17	Tropical Storm Talas	2017-0281	2017195N16114	1	yes
THA	17.07.17	Tropical Storm Talas	2017-0281	2017195N16114	0	yes
VNM	17.07.17	Tropical Storm Talas	2017-0281	2017195N16114	1	yes
CHN	16.07.17	Tropical Storm Talas	2017-0281	2017195N16114	4	yes
AUS	01.02.80	Enid	1980-0289	N/A	0
MMR	01.06.17	Cyclone Mora	2017-0152	2017147N14087	5	yes
BGD	30.05.17	Cyclone Mora	2017-0152	2017147N14087	1	yes
IND	30.05.17	Cyclone Mora	2017-0152	2017147N14087	1	yes
VUT	07.05.17	Tropical cyclone 'Donna'	2017-0231	2017122S13170	5
IDN	15.02.80	0	1980-0315	N/A	0
AUS	27.03.17	Debbie	2017-0105	2017081S13152	15
MDG	07.03.17	Cyclone 'Enawo'	2017-0075	2017061S11061	2
MOZ	15.02.17	Cyclone 'Dineo'	2017-0051	2017043S19040	1
BGD	01.04.80	0	1980-0038	N/A	0
PHL	25.12.16	Typhoon 'Nina' (Nock-Ten)	2016-0503	2016355N07146	5
IND	12.12.16	Cyclone 'Vardah'	2016-0485	2016341N08092	14
CRI	23.11.16	Tropical storm Otto	2016-0433	2016323N13279	2
PHL	23.11.16	Tropical storm Marce (Tokage)	2016-0456	2016328N09130	4
PHL	07.05.80	(Ditang)	1980-0133	1980126N08150	0	yes
PAN	21.11.16	Tropical storm Otto	2016-0433	2016323N13279	1
NIC	17.11.16	Tropical storm Otto	2016-0433	2016323N13279	1
CHN	19.10.16	Typhoon Lawin (Haima)	2016-0364	﻿2016288N07145	0	yes
PHL	19.10.16	Typhoon Lawin (Haima)	2016-0364	﻿2016288N07145	0	yes
CHN	16.10.16	Typhoon Karen (Sarika)	2016-0363	﻿2016287N13130	0	yes
PHL	16.10.16	Typhoon Karen (Sarika)	2016-0363	﻿2016287N13130	0	yes
VNM	13.10.16	Tropical storm Aere	2016-0362	2016279N19130	5
USA	13.05.80	0	1980-0299	N/A	0
KOR	05.10.16	Typhoon Chaba (Chyba?)	2016-0361	2016269N15165	3
CHN	28.09.16	Typhoon Megi	2016-0350	2016266N11144	8
USA	04.06.80	0	1980-0300	N/A	0
TWN	27.09.16	Typhoon Megi	2016-0350	2016266N11144	11
JPN	20.09.16	Typhoon Malakas	2016-0390	2016256N12146	8
PHL	16.09.16	Typhoon Ferdie (Meranti)	2016-0342	2016253N13144	5	yes
CHN	15.09.16	Typhoon Ferdie (Meranti)	2016-0342	2016253N13144	5	yes
TWN	14.09.16	Typhoon Ferdie (Meranti)	2016-0342	2016256N12146	15	yes
MEX	06.09.16	Hurricane Newton	2016-0319	2016248N15255	13
JPN	04.09.16	Typhoon Lionrock	2016-0324	2016244N21123	11
USA	01.09.16	Hurricane Hermine	2016-0322	2016242N24279	1
JPN	22.08.16	Tropical storm Mindulle	2016-0382	﻿2016230N15138	0	yes
KOR	01.07.80	0	1980-0059	N/A	0
VNM	18.08.16	Tropical storm Dianmu	2016-0379	2016228N22117	7
GTM	06.08.16	Tropical storm Earl	2016-0284	2016215N16283	1
HND	06.08.16	Tropical storm Earl	2016-0284	2016215N16283	1
PHL	19.07.80	(Nitang/Osang)	1980-0136	N/A	0
BLZ	04.08.16	Tropical storm Earl	2016-0284	2016215N16283	1
VNM	28.07.16	Storm Mirinae	2016-0268	2016207N17116	1
CHN	09.07.16	Typhoon Butchoy (Nepartak)	2016-0256	2016185N08145	0	yes
TWN	09.07.16	Typhoon Butchoy (Nepartak)	2016-0256	2016185N08145	2	yes
PHL	08.07.16	Typhoon Butchoy (Nepartak)	2016-0256	2016185N08145	2	yes
BGD	21.05.16	Cyclone Roanu	2016-0175	2016138N10081	1
PHL	25.07.80	Kim	1980-0070	1980201N08155	0
FJI	04.04.16	Tropical cyclone Zena	2016-0141	2016095S13162	1
FJI	20.02.16	Cyclone Winston	2016-0041	2016041S14170	3
TON	19.02.16	Cyclone Winston	2016-0041	2016041S14170	3
TON	02.01.16	Cyclone Ulla	2016-0004	2015364S09190	1
PHL	14.12.15	Typhoon Melor (Nona)	2015-0543	2015344N07145	1
SOM	08.11.15	Cyclone Megh	2015-0494	2015309N14067	13
YEM	08.11.15	Cyclone Megh	2015-0494	2015309N14067	13
YEM	03.11.15	Cyclone Chapala	2015-0484	2015301N11065	2
SOM	02.11.15	Cyclone Chapala	2015-0484	2015301N11065	2
MEX	22.10.15	Hurricane Patricia	2015-0470	2015293N13266	7
PHL	14.10.15	Typhoon Koppu (Lando)	2015-0462	2015285N14151	13
CHN	04.10.15	Typhoon Mujigae	2015-0490	2015273N12130	13
PHL	02.10.15	Typhoon Mujigae	2015-0490	2015273N12130	1
BHS	01.10.15	Hurricane Joaquin	2015-0479	2015270N27291	2	yes
USA	01.10.15	Joaquin	2015-0459	2015270N27291	1	yes
CHN	28.09.15	Typhoon Dujuan	2015-0458	2015263N14148	2
JPN	28.09.15	Typhoon Dujuan	2015-0458	2015263N14148	14
TWN	28.09.15	Typhoon Dujuan	2015-0458	2015263N14148	2
JPN	11.09.80	Orchid	1980-0089	N/A	0
KOR	15.09.80	Orchid	1980-0091	N/A	0
VNM	14.09.15	Cyclone Vamco	2015-0620	2015256N16113	1
JPN	08.09.15	Tropical Storm Etau	2015-0456	2015249N18142	7
CPV	31.08.15	Hurricane 'Fred'	2015-0473	2015242N12343	1
AUS	01.12.80	0	1980-0290	N/A	0
IND	03.12.80	0	1980-0228	N/A	0
BGD	06.03.81	0	1981-0274	N/A	0
JPN	25.08.15	Typhoon Goni (Ineng)	2015-0371	2015226N12151	12
PHL	22.08.15	Typhoon Goni (Ineng)	2015-0371	2015226N12151	2
THA	06.07.81	Kelly	1981-0064	N/A	0
CHN	09.08.15	Typhoon 'Soudelor' (Hanna)	2015-0339	2015211N13162	6
TWN	08.08.15	Typhoon 'Soudelor' (Hanna)	2015-0339	2015211N13162	2
IND	07.08.81	0	1981-0206	N/A	0
MNP	01.08.15	Typhoon 'Soudelor' (Hanna)	2015-0339	2015211N13162	7
BGD	29.07.15	Cyclone 'Komen'	2015-0309	2015207N22091	1
JPN	16.07.15	Typhoon Nangka	2015-0261	﻿2015184N08172	0	yes
PHL	12.07.15	Typhoon Chan-Home	2015-0244	2015180N09160	0	yes
TWN	12.07.15	Typhoon Chan-Home	2015-0244	2015180N09160	0	yes
CHN	11.07.15	Typhoon Chan-Home	2015-0244	2015180N09160	14	yes
PHL	16.08.81	(Rubing)	1981-0136	N/A	0
JPN	09.07.15	Typhoon Chan-Home	2015-0244	2015188N08194	15
SLB	05.07.15	Tropical cylone Raquel	2015-0281	2015180S04163	2	yes
PHL	04.07.15	Tropical cyclone Linfa (Egay)	2015-0278	2015183N13130	1
VNM	24.06.15	Tropical storm Kujira	2015-0252	2015171N15112	1
CHN	22.06.15	Tropical storm Kujira	2015-0252	2015171N15112	1
JPN	12.05.15	Typhoon Noul (Dodong)	2015-0176	2015122N07144	14	yes
PHL	11.05.15	Typhoon Noul (Dodong)	2015-0176	2015122N07144	5	yes
PHL	06.04.15	Typhoon' Maysak'	2015-0105	2015085N06162	3	yes
CHN	04.04.15	Typhoon' Maysak'	2015-0105	2015085N06162	0	yes
FSM	27.03.15	Typhoon' Maysak'	2015-0105	2015085N06162	1	yes
PNG	13.03.15	Cyclone 'Pam'	2015-0093	2015066S08170	0	yes
AUS	12.03.15	Cyclone 'Olwyn'	2015-0135	﻿2015068S14113	0	yes
KIR	12.03.15	Cyclone 'Pam'	2015-0093	2015066S08170	0	yes
VUT	12.03.15	Cyclone 'Pam'	2015-0093	2015066S08170	1	yes
TUV	10.03.15	Cyclone 'Pam'	2015-0093	2015066S08170	0	yes
SLB	06.03.15	Cyclone 'Pam'	2015-0093	2015066S08170	0	yes
KOR	31.08.81	Agnes	1981-0078	N/A	0
AUS	20.02.15	Cyclone Lam	2015-0053	2015045S12145	0	yes
MDG	07.02.15	Tropical storm 'Fundi'	2015-0074	2015036S20038	7
PHL	19.01.15	Tropical storm 'Amang' (Mekkhala)	2015-0017	2015012N09146	8
MDG	16.01.15	Tropical storm 'Chedza'	2015-0016	2015013S18038	1
PHL	28.12.14	Tropical storm 'Jangmi' (Seniang)	2014-0497	2014362N07130	7
PHL	12.12.14	Typhoon 'Hagupit' (Ruby)	2014-0479	2014334N02156	12
VNM	30.11.14	Tropical storm 'Sinlaku' (Queenie)	2014-0474	2014329N08131	2
PHL	27.11.14	Tropical storm 'Sinlaku' (Queenie)	2014-0474	2014329N08131	1
MEX	18.10.14	Tropical storm Trudy	2014-0417	2014290N14261	10
IND	12.10.14	Cyclone Hudhud	2014-0392	2014279N11096	2
JPN	12.10.14	Typhoon Vongfong	2014-0396	2014275N06166	12
JPN	06.10.14	Typhoon Phanfone	2014-0397	2014275N06166	0	yes
CHN	18.09.14	Tropical strom Fung-Wong (Mario)	2014-0330	2014260N13135	15	yes
TWN	18.09.14	Tropical strom Fung-Wong (Mario)	2014-0330	2014260N13135	1	yes
PHL	17.09.14	Tropical strom Fung-Wong (Mario)	2014-0330	2014260N13135	15	yes
VNM	16.09.14	Typhoon Kalmaegi (Luis)	2014-0390	2014254N10142	2	yes
CHN	10.09.14	Typhoon Kalmaegi (Luis)	2014-0390	2014254N10142	1	yes
MEX	10.09.14	Hurricane Odile	2014-0333	2014253N13260	15
PHL	10.09.14	Typhoon Kalmaegi (Luis)	2014-0390	2014254N10142	1	yes
MEX	04.09.14	Tropical storm Dolly	2014-0385	2014246N17254	13
MEX	02.09.14	Hurricane Norbert	2014-0386	﻿2014246N17254	0	yes
MEX	22.08.14	Hurricane Marie	2014-0325	2014234N12261	7	yes
IND	24.09.81	0	1981-0207	N/A	0
USA	08.08.14	Hurricane Iselle	2014-0310	2014212N11242	5
JPN	03.08.14	Tropical storm Nakri	2014-0314	2014209N16134	0	yes
KOR	03.08.14	Tropical storm Nakri	2014-0314	2014209N16134	0	yes
CHN	22.07.14	Typhoon Henry (Matmo)	2014-0240	2014197N10137	14
PHL	22.07.14	Typhoon Henry (Matmo)	2014-0240	2014197N10137	14
TWN	22.07.14	Typhoon Henry (Matmo)	2014-0240	2014197N10137	2
VNM	19.07.14	Typhoon Rammasun (Glenda)	2014-0227	2014190N08154	3	yes
CHN	18.07.14	Typhoon Rammasun (Glenda)	2014-0227	2014190N08154	0	yes
PHL	15.07.14	Typhoon Rammasun (Glenda)	2014-0227	2014190N08154	2	yes
JPN	07.07.14	Typhoon Neoguri	2014-0236	2014184N08147	8
CHN	14.06.14	Hagibis	2014-0213	2014164N19116	1
PHL	17.11.81	(Yeyeng)	1981-0138	1981317N14153	0	yes
VUT	12.12.81	Gyan	1981-0109	N/A	0
PNG	07.04.14	Cyclone Ita	2014-0423	2014092S11159	1
MDG	29.03.14	Cyclone Helen	2014-0092	2014086S10041	1
COM	27.03.14	Cyclone Helen	2014-0092	2014086S10041	1
VUT	09.03.14	Tropical cylone Lusi	2014-0096	2014068S16169	1
PHL	31.01.14	Topical storm Basyang (Kajiki)	2014-0055	2014029N10143	1
IDN	01.01.82	0	1982-0242	N/A	0
TON	06.01.14	Ian	2014-0001	2014004S17183	1
MDG	28.01.82	Benedic, Electre, Frida, Justine	1982-0147	1982030S15065	0	yes
MUS	01.02.82	Frida	1982-0139	1982036S16060	0
CHN	11.11.13	Typhoon Haiyan (Yolanda)	2013-0433	2013306N07162	14	yes
VNM	11.11.13	Typhoon Haiyan (Yolanda)	2013-0433	2013306N07162	15	yes
PHL	08.11.13	Typhoon Haiyan (Yolanda)	2013-0433	2013306N07162	0	yes
SOM	08.11.13	Cyclone 3A	2013-0438	2013310N06066	1
PLW	07.11.13	Typhoon Haiyan (Yolanda)	2013-0433	2013306N07162	0	yes
PHL	31.10.13	Typhoon Krosa (Vinta)	2013-0437	2013301N13142	7
JPN	14.10.13	Typhoon Wipha	2013-0396	2013282N14149	14
IND	12.10.13	Cyclone Phailin	2013-0401	2013281N12098	2
PHL	12.10.13	Tropical storm Nari (SAnti)	2013-0430	2013282N14132	7	yes
VNM	10.10.13	Tropical storm Nari (SAnti)	2013-0430	2013282N14132	13	yes
CHN	07.10.13	Tropical storm Fitow	2013-0429	2013272N10135	14	yes
JPN	07.10.13	Tropical storm Fitow	2013-0429	﻿2013272N10135	0	yes
PHL	18.03.82	(Akang)	1982-0173	1982073N07153	0
VNM	30.09.13	Typhoon Wutip	2013-0419	2013269N15118	1
CHN	22.09.13	Typhoon Usagi (Odette)	2013-0373	2013259N17132	5
TWN	22.09.13	Typhoon Usagi (Odette)	2013-0373	2013259N17132	8
PHL	21.09.13	Typhoon Usagi (Odette)	2013-0373	2013259N17132	5
JPN	16.09.13	Tropical storm Man-Yi	2013-0415	2013255N20148	10
MEX	13.09.13	Hurricane Manuel	2013-0358	2013255N19268	0	yes
MEX	12.09.13	Hurricane Ingrid	2013-0406	﻿2013255N19268	15	yes
JPN	04.09.13	Tropical storm Toraji	2013-0413	﻿2013243N26122	13	yes
MEX	25.08.13	Tropical storm Fernand	2013-0335	2013238N19266	15	yes
CHN	22.08.13	Typhoon Trami (Maring)	2013-0306	2013228N23124	14
TWN	22.08.13	Typhoon Trami (Maring)	2013-0306	2013228N23124	5
CHN	15.08.13	Tropical storm Utor (Labuyo)	2013-0272	2013220N12137	14
PHL	12.08.13	Tropical storm Utor (Labuyo)	2013-0272	2013220N12137	7
CHN	02.08.13	Tropical storm Jebi	2013-0341	2013210N13123	10
VNM	02.08.13	Tropical storm Jebi	2013-0341	2013210N13123	1
CHN	14.07.13	Typhoon Soulik	2013-0249	2013187N20156	15	yes
TWN	14.07.13	Typhoon Soulik	2013-0249	2013187N20156	2	yes
CHN	13.07.13	Tropical storm Ciramon	2013-0261	2013196N14128	11	yes
CHN	01.07.13	Typhoon Rumbia	2013-0258	2013178N09133	13
PHL	30.06.13	Typhoon Rumbia	2013-0258	2013178N09133	1
MEX	29.05.13	Hurricane Barbara	2013-0188	2013149N14264	1
BGD	16.05.13	Tropical cyclone Mahasen	2013-0138	2013130N04093	2
IND	16.05.13	Tropical cyclone Mahasen	2013-0138	2013130N04093	2
AUS	01.04.82	Dominic	1982-0255	1982095S11138	0	yes
MDG	22.02.13	Tropical cyclone Haruna	2013-0032	2013046S20042	8
NIC	23.05.82	Alleta	1982-0060	N/A	0
HND	24.05.82	Alleta	1982-0061	N/A	0
MDG	30.01.13	Topical Depression Feleng	2013-0026	2013026S13067	2
AUS	23.01.13	Ex-Tropical cyclone Oswald	2013-0008	2013021S16137	0	yes
PHL	03.01.13	Tropcal storm Auring	2013-0036	2013001N04141	13
PHL	25.12.12	Tropical storm Wukong (Quinta)	2012-0540	2012359N08134	7
FJI	16.12.12	Cyclone Evan	2012-0498	2012346S14180	2
WLF	15.12.12	Cyclone Evan	2012-0498	2012346S14180	2
WSM	13.12.12	Cyclone Evan	2012-0498	2012346S14180	1
PHL	04.12.12	Typhoon Bopha	2012-0500	2012331N03157	5	yes
PLW	02.12.12	Typhoon Bopha	2012-0500	2012331N03157	2
PHL	20.08.82	(Norming)	1982-0175	N/A	0
IND	04.11.12	Cyclone Nilam	2012-0425	2012301N11087	2
LKA	29.10.12	Cyclone Nilam	2012-0425	2012301N11087	1
CHN	28.10.12	Typhoon Son Tinh (Ofel)	2012-0406	2012296N06135	2
USA	28.10.12	Hurricane Sandy	2012-0410	2012296N14283	2
VNM	28.10.12	Typhoon Son Tinh (Ofel)	2012-0406	2012296N06135	8
PHL	25.10.12	Typhoon Son Tinh (Ofel)	2012-0406	2012296N06135	1
BHS	24.10.12	Hurricane Sandy	2012-0410	2012296N14283	1	yes
DOM	24.10.12	Hurricane Sandy	2012-0410	2012296N14283	0	yes
HTI	24.10.12	Hurricane Sandy	2012-0410	2012296N14283	0	yes
JAM	24.10.12	Hurricane Sandy	2012-0410	2012296N14283	1	yes
CUB	22.10.12	Hurricane Sandy	2012-0410	2012296N14283	1	yes
JPN	25.08.82	Ellis	1982-0092	N/A	0
JPN	29.09.12	Typhoon Jelawat	2012-0451	2012274N13151	15
KOR	27.08.82	Ellis	1982-0095	N/A	0
JPN	15.09.12	Typhoon Sanba	2012-0588	2012254N09135	8
KOR	15.09.12	Typhoon Sanba	2012-0588	2012254N09135	8
CPV	29.09.82	Beryl	1982-0104	N/A	0
MEX	30.09.82	Paul	1982-0105	1982262N12270	0	yes
PRK	28.08.12	Typhoon Bolaven	2012-0414	2012232N13141	3	yes
KOR	28.08.12	Typhoon Bolaven	2012-0414	2012232N13141	0	yes
USA	28.08.12	Hurricane Isaac	2012-0313	2012234N16315	2	yes
CUB	25.08.12	Hurricane Isaac	2012-0313	2012234N16315	2	yes
DOM	25.08.12	Hurricane Isaac	2012-0313	2012234N16315	2	yes
HTI	25.08.12	Hurricane Isaac	2012-0313	2012234N16315	2	yes
JPN	25.08.12	Typhoon Bolaven	2012-0414	2012232N13141	0	yes
PRI	25.08.12	Hurricane Isaac	2012-0313	2012234N16315	0	yes
TWN	24.08.12	Typhoon Tembin	2012-0585	2012230N21126	8
PHL	20.08.12	Typhoon Igme (Tembin)	2012-0296	2012230N21126	15
CHN	17.08.12	TYphoon Kai-Tak	2012-0294	2012225N16133	11
PHL	17.08.12	TYphoon Kai-Tak	2012-0294	2012225N16133	2
VNM	17.08.12	TYphoon Kai-Tak	2012-0294	2012225N16133	2
MEX	10.08.12	Ernesto	2012-0276	2012215N12313	2
CHN	08.08.12	Tropical storm Gener (Saola)	2012-0260	2012209N11131	14	yes
CHN	08.08.12	Typhoon Haikui	2012-0282	2012215N23146	0	yes
CHN	02.08.12	Typhoon Damrey	2012-0283	﻿2012209N25149	0	yes
TWN	02.08.12	Tropical storm Gener (Saola)	2012-0260	2012209N11131	2	yes
PHL	31.07.12	Tropical storm Gener (Saola)	2012-0260	2012209N11131	0	yes
VNM	26.07.12	Typhoon Vicente	2012-0259	2012201N15129	0	yes
CHN	24.07.12	Typhoon Vicente	2012-0259	2012201N15129	7	yes
HKG	01.01.83	Joe	1983-0303	N/A	0
MEX	15.06.12	Hurricane Carlotta	2012-0401	2012166N09269	7
MOZ	03.03.12	Tropical depression "Irina"	2012-0056	2012056S13057	0	yes
MDG	26.02.12	Tropical depression "Irina"	2012-0056	2012056S13057	10	yes
MDG	14.02.12	Cyclone Giovanna	2012-0043	2012039S14075	5	yes
MDG	24.01.12	Cyclone Funso	2012-0005	2012018S16041	0	yes
MOZ	20.01.12	Cyclone Funso	2012-0005	2012018S16041	13	yes
MOZ	18.01.12	Tropical Storm Dando	2012-0006	2012010S24049	0	yes
MWI	01.01.12	Cyclone Funso	2012-0005	2012018S16041	0	yes
ZAF	01.01.12	Tropical Storm Dando	2012-0006	2012010S24049	0	yes
IND	29.12.11	Cyclone Thane	2011-0566	2011360N09088	4
PHL	15.12.11	Tropical storm Washi (Sendong)	2011-0519	2011346N03156	1
OMN	03.11.11	Keila	2011-0414	2011302N13062	1
PHL	13.10.11	Tropical Storm Ramon (Banyan)	2011-0384	2011282N08136	10
MEX	10.10.11	Hurricane Jova	2011-0385	2011279N10257	11
CHN	01.03.83	0	1983-0313	N/A	0
CHN	29.09.11	Typhoon Pedring (Nesat)	2011-0379	2011270N18139	15
BGD	21.03.83	0	1983-0056	N/A	0
PHL	24.09.11	Typhoon Pedring (Nesat)	2011-0379	2011266N13139	4	yes
JPN	22.09.11	Typhoon Roke	2011-0352	2011257N19154	14
MEX	09.09.11	Hurricane Nate	2011-0460	2011250N20266	7
USA	04.09.11	Tropical Storm Lee	2011-0456	2011245N27269	13
JPN	02.09.11	Typhoon Talas	2011-0454	2011236N15143	5
CAN	28.08.11	Hurricane Irene	2011-0328	2011233N15301	2	yes
PHL	27.08.11	Typhoon Mina (Nanmadol)	2011-0341	2011233N12129	5
USA	27.08.11	Hurricane Irene	2011-0328	2011233N15301	5	yes
DOM	24.08.11	Hurricane Irene	2011-0328	2011233N15301	1	yes
HTI	24.08.11	Hurricane Irene	2011-0328	2011233N15301	1	yes
BHS	23.08.11	Hurricane Irene	2011-0328	2011233N15301	4	yes
PRI	22.08.11	Hurricane Irene	2011-0328	2011233N15301	1	yes
PRK	07.08.11	Typhoon "Kabayan" (Muifa)	2011-0279	2011208N09145	3
CHN	04.08.11	Typhoon "Kabayan" (Muifa)	2011-0279	2011208N09145	14
IND	01.04.83	0	1983-0061	N/A	0
IND	19.06.83	0	1983-0087	N/A	0
PHL	14.07.83	Vera (Bebeng)	1983-0096	1983186N04153	0	yes
THA	04.08.11	Topical storm Juaning (Nock-ten)	2011-0272	2011205N12130	0	yes
VNM	01.09.83	Herbert (NÂ°7), Kim (NÂ°9), Lex (NÂ°10)	1983-0125	N/A	0
TWN	09.09.83	Ellen	1983-0120	1983239N10183	0
PHL	26.07.11	Topical storm Juaning (Nock-ten)	2011-0272	2011205N12130	1	yes
GTM	20.07.11	Tropical storm "Dora"	2011-0267	2011199N10271	0	yes
MEX	20.07.11	Tropical storm "Dora"	2011-0267	2011199N10271	7	yes
MEX	30.06.11	Tropical Storm "Arlene"	2011-0241	2011179N20267	13
VNM	05.10.83	Georgia (NÂ°6)	1983-0452	1983276N06130	0
MEX	20.06.11	Tropical storm "Beatrix"	2011-0228	2011170N12263	1
CHN	19.06.11	Tropical Storm Haima (Egay)	2011-0576	2011167N08129	1	yes
VNM	19.06.11	Tropical Storm Haima (Egay)	2011-0576	2011167N08129	0	yes
PHL	14.06.11	Tropical Storm Haima (Egay)	2011-0576	2011167N08129	0	yes
BGD	15.10.83	0	1983-0133	N/A	0
PHL	17.11.83	Orchid (Warling)	1983-0220	1983317N12153	0	yes
PHL	20.05.11	Typhoon Chedeng (Songda)	2011-0555	2011140N08142	10
PHL	08.05.11	Typhoon Bebeng (Aere)	2011-0157	2011126N11129	1
MDG	14.02.11	Tropical Cclone Bingiza	2011-0057	2011038S11062	2
AUS	02.02.11	Tropical Cyclone "Yasi"	2011-0070	2011028S13180	15
CHN	01.01.84	Freda	1984-0213	N/A	0
SLB	02.02.11	Tropical Cyclone "Yasi"	2011-0070	2011028S13180	1
VUT	30.01.11	Tropical Cyclone "Yasi"	2011-0070	2011028S13180	10
TON	25.01.11	Tropical cyclone Wilma	2011-0091	2011020S13182	2
VUT	12.01.11	Tropical cyclone "Vania"	2011-0071	2011010S17169	1
HTI	04.11.10	Hurricane Tomas	2010-0571	2010302N09306	2
IND	31.10.10	Cyclone Jal	2010-0693	2010305N06105	10
LCA	30.10.10	Hurricane Tomas	2010-0571	2010302N09306	1
BRB	29.10.10	Hurricane Tomas	2010-0571	2010302N09306	1
DOM	29.10.10	Hurricane Tomas	2010-0571	2010302N09306	1
VCT	29.10.10	Hurricane Tomas	2010-0571	2010302N09306	1
CHN	22.10.10	Typhoon Megi (Juan)	2010-0543	2010285N13145	13	yes
MMR	22.10.10	Cyclone "Giri"	2010-0554	2010293N17093	1	yes
TWN	22.10.10	Typhoon Megi (Juan)	2010-0543	2010285N13145	6	yes
PHL	18.10.10	Typhoon Megi (Juan)	2010-0543	2010285N13145	2	yes
MUS	07.02.84	Haja	1984-0144	N/A	0
BLZ	25.09.10	Tropical storm Matthew	2010-0503	2010267N14285	13	yes
SLV	25.09.10	Tropical storm Matthew	2010-0503	2010267N14285	0	yes
GTM	25.09.10	Tropical storm Matthew	2010-0503	2010267N14285	13	yes
HND	25.09.10	Tropical storm Matthew	2010-0503	2010267N14285	1	yes
MEX	25.09.10	Tropical storm Matthew	2010-0503	2010267N14285	15	yes
NIC	24.09.10	Tropical storm Matthew	2010-0503	2010267N14285	1	yes
VEN	24.09.10	Tropical storm Matthew	2010-0503	2010267N14285	0	yes
CHN	20.09.10	Typhoon Fanapi	2010-0484	2010256N17137	14
TWN	18.09.10	Typhoon Fanapi	2010-0484	2010256N17137	14
MEX	15.09.10	Hurricane Karl	2010-0494	2010257N16282	7
CHN	09.09.10	Typhoon Meranti	2010-0691	2010249N24125	13
USA	07.09.10	Tropical storm Hermine	2010-0522	N/A	0	yes
USA	03.09.10	Hurricane Earl	2010-0468	2010236N12341	6
PRK	02.09.10	Typhoon Kompasu	2010-0479	2010240N15142	2
KOR	02.09.10	Typhoon Kompasu	2010-0479	2010240N15142	8
ATG	29.08.10	Hurricane Earl	2010-0468	2010236N12341	2
VNM	24.08.10	Typhoon Mindulle	2010-0432	2010233N17119	4
MEX	23.08.10	Hurricane Frank	2010-0426	2010234N14267	10
VNM	15.04.84	0	1984-0035	N/A	0
MEX	01.09.84	0	1984-0078	1984250N17256	0
ESP	04.10.84	Hortense	1984-0280	N/A	0
VNM	17.07.10	Typhoon Conson (Basyang)	2010-0308	2010191N12138	2
CHN	16.07.10	Typhoon Conson (Basyang)	2010-0308	2010191N12138	2
PHL	12.07.10	Typhoon Conson (Basyang)	2010-0308	2010191N12138	1
MEX	30.06.10	Tropical storm "Alex"	2010-0260	2010176N16278	2	yes
SLV	27.06.10	Tropical storm "Alex"	2010-0260	2010176N16278	0	yes
GTM	27.06.10	Tropical storm "Alex"	2010-0260	2010176N16278	4	yes
NIC	27.06.10	Tropical storm "Alex"	2010-0260	2010176N16278	0	yes
OMN	06.06.10	Cyclone "Phet"	2010-0210	2010151N14065	2
PAK	06.06.10	Cyclone "Phet"	2010-0210	2010151N14065	2
SLV	29.05.10	Hurricane Agatha	2010-0211	2010149N13266	0	yes
HND	29.05.10	Hurricane Agatha	2010-0211	2010149N13266	0	yes
GTM	28.05.10	Hurricane Agatha	2010-0211	2010149N13266	1	yes
IND	20.05.10	Cyclone "Laila"	2010-0198	2010137N10090	1
FRA	05.10.84	Hortense	1984-0257	N/A	0
DMA	09.10.84	Klaus	1984-0092	N/A	0
KNA	01.11.84	Klaus	1984-0242	N/A	0
AUS	21.03.10	Cyclone "Ului"	2010-0120	2010070S15168	3
SLB	15.03.10	Cyclone "Ului"	2010-0120	2010070S15168	2
FJI	14.03.10	Cyclone "Tomas"	2010-0106	2010069S12188	1
MDG	10.03.10	Tropical storm "Hubert"	2010-0104	2010066S19050	4
COK	11.02.10	Pat	2010-0078	2010038S08194	2
PYF	04.02.10	Cyclone "Oli"	2010-0044	2010029S12177	2
FJI	14.12.09	Cyclone Mick	2009-0554	2009346S10172	1
TCA	01.01.85	Kate	1985-0389	N/A	0
USA	01.01.85	Kate	1985-0013	N/A	0
IND	11.11.09	Cyclone Phyan	2009-0609	2009313N11072	1
USA	09.11.09	Hurricane "Ida"	2009-0477	2009308N11279	2	yes
MEX	08.11.09	Hurricane "Ida"	2009-0477	2009308N11279	7	yes
SLV	07.11.09	Hurricane "Ida"	2009-0477	2009308N11279	0	yes
NIC	05.11.09	Hurricane "Ida"	2009-0477	2009308N11279	1	yes
KHM	02.11.09	Tropical storm "Mirinae" (Santi)	2009-0478	2009299N12153	5
VNM	02.11.09	Tropical storm "Mirinae" (Santi)	2009-0478	2009299N12153	5
PHL	28.10.09	Tropical storm "Mirinae" (Santi)	2009-0478	2009299N12153	10
VUT	16.01.85	Eric & Nigel	1985-0020	N/A	0
VNM	14.10.09	Typhoon "Pepeng" (Parma)	2009-0422	2009270N10148	0	yes
CHN	13.10.09	Typhoon "Pepeng" (Parma)	2009-0422	2009270N10148	0	yes
JPN	07.10.09	TYphoon "Melor"	2009-0423	2009272N07164	8
KHM	29.09.09	Tropical storm "Ondoy" (Ketsana)	2009-0414	2009268N14128	1	yes
LAO	29.09.09	Tropical storm "Ondoy" (Ketsana)	2009-0414	2009268N14128	1	yes
PHL	29.09.09	Typhoon "Pepeng" (Parma)	2009-0422	2009270N10148	0	yes
VNM	28.09.09	Tropical storm "Ondoy" (Ketsana)	2009-0414	2009268N14128	0	yes
PHL	24.09.09	Tropical storm "Ondoy" (Ketsana)	2009-0414	2009268N14128	0	yes
HKG	15.09.09	Typhoon "Koppu"	2009-0399	2009254N14130	1
CHN	14.09.09	Typhoon "Koppu"	2009-0399	2009254N14130	15
JPN	15.06.85	Typhoon Irma	1985-0079	1985168N22122	0
JPN	01.09.85	Pat	1985-0375	N/A	0	reject
MEX	02.09.09	Hurricane Jimena	2009-0384	2009239N12270	2
PHL	15.10.85	Dot (Saling)	1985-0124	N/A	0	reject
CAN	23.08.09	Hurricane Bill	2009-0342	2009227N12328	2	yes
USA	23.08.09	Hurricane Bill	2009-0342	2009227N12328	2	yes
JPN	10.08.09	Typhoon "Etau"	2009-0316	2009219N19140	15
JAM	18.11.85	Kate	1985-0133	N/A	0
TWN	07.08.09	Typhoon Morakot (Kiko)	2009-0321	2009215N20133	7
IND	16.05.86	0	1986-0062	N/A	0
CHN	01.08.09	Tropical cylone "Goni"	2009-0621	﻿2009213N16130	10	yes
PHL	01.08.09	Goni (Jolina)	2009-0606	N/A	0	yes
PHL	23.07.09	Topical Storm "Feria" (Nangka)	2009-0239	N/A	11	yes
KOR	30.08.86	Vera	1986-0105	N/A	0
BGD	25.05.09	Cyclone "Aila"	2009-0204	2009143N17089	4
IND	25.09.86	0	1986-0116	N/A	0
IND	25.05.09	Cyclone "Aila"	2009-0204	2009143N17089	4
PHL	07.05.09	Typhoon "Emong" (Chanom)	2009-0165	2009123N10111	0	yes
BGD	26.09.86	0	1986-0117	N/A	0
BGD	19.04.09	Cyclone "Bijli"	2009-0157	2009104N13088	2
MDG	06.04.09	Tropical storm "Jade"	2009-0137	2009093S12062	13
MOZ	26.03.09	Tropical storm "Izilda"	2009-0123	2009082S16039	0	yes
MDG	17.03.09	Tropical storm "Izilda"	2009-0123	2009082S16039	0	yes
AUS	26.01.09	Tropical storm "Dominic"	2009-0048	2009024S17123	10
MDG	19.01.09	Cyclones Eric and Fanele	2009-0047	N/A	0	yes
VNM	17.11.08	Tropical storm "Noul"	2008-0552	2008320N08122	4
CYM	08.11.08	Hurricane Paloma	2008-0514	2008311N14278	1
CUB	08.11.08	Hurricane Paloma	2008-0514	2008311N14278	1
PHL	06.11.08	Tropical Storm "Maysak" (Quinta-Sony)	2008-0540	2008311N08128	4
PHL	06.10.86	Dom (Oyang)	1986-0122	N/A	0
BGD	27.10.08	Cyclone "Reshmi"	2008-0648	2008298N16085	1
ATG	15.10.08	Hurricane "Omar"	2008-0604	2008287N15291	1
VNM	30.09.08	Typhoon "Mekkhala"	2008-0437	2008272N15113	13
PHL	29.09.08	TRopical storm "Higos" (Pablo)	2008-0623	2008272N08139	13
CHN	28.09.08	Typhoon "Jangmi" (Ofel)	2008-0441	2008268N12140	15	yes
TWN	28.09.08	Typhoon "Jangmi" (Ofel)	2008-0441	2008268N12140	8	yes
HKG	25.09.08	Typhoon "Hagupit" (Nina)	2008-0426	2008262N16142	0	yes
VNM	25.09.08	Typhoon "Hagupit" (Nina)	2008-0426	2008262N16142	2	yes
CHN	24.09.08	Typhoon "Hagupit" (Nina)	2008-0426	2008262N16142	15	yes
TWN	23.09.08	Typhoon "Hagupit" (Nina)	2008-0426	2008262N16142	0	yes
HKG	22.09.08	Tropical storm "Nuri" (Karen)	2008-0369	N/A	5	yes
PHL	22.09.08	Typhoon "Hagupit" (Nina)	2008-0426	2008262N16142	8	yes
TWN	16.09.08	Typhoon "Sinlaku"	2008-0442	2008252N16128	2
USA	12.09.08	Hurricane Ike	2008-0384	2008245N17323	12	yes
CUB	08.09.08	Hurricane Ike	2008-0384	2008245N17323	14	yes
BHS	07.09.08	Hurricane Ike	2008-0384	2008245N17323	14	yes
HTI	06.09.08	Hurricane Ike	2008-0384	2008245N17323	0	yes
TCA	06.09.08	Hurricane Ike	2008-0384	2008245N17323	0	yes
DOM	03.09.08	Hurricane Hanna	2008-0378	2008241N19303	15	yes
HTI	02.09.08	Hurricane Hanna	2008-0378	2008241N19303	15	yes
TCA	01.09.08	Hurricane Hanna	2008-0378	2008241N19303	0	yes
USA	01.09.08	Hurricane "Gustav"	2008-0352	2008238N13293	0	yes
CUB	29.08.08	Hurricane "Gustav"	2008-0352	2008238N13293	0	yes
JAM	28.08.08	Hurricane "Gustav"	2008-0352	2008238N13293	1	yes
USA	28.08.08	Hurricane Hanna	2008-0378	2008241N19303	0	yes
BHS	26.08.08	Hurricane "Gustav"	2008-0352	2008238N13293	0	yes
CYM	26.08.08	Hurricane "Gustav"	2008-0352	2008238N13293	1	yes
DOM	26.08.08	Hurricane "Gustav"	2008-0352	2008238N13293	13	yes
HTI	26.08.08	Hurricane "Gustav"	2008-0352	2008238N13293	13	yes
TCA	26.08.08	Hurricane "Gustav"	2008-0352	2008238N13293	0	yes
CHN	22.08.08	Tropical storm "Nuri" (Karen)	2008-0369	2008229N13147	11
PHL	22.08.08	Tropical storm "Nuri" (Karen)	2008-0369	2008229N13147	2
CUB	20.08.08	Tropical Storm "Fay"	2008-0338	2008229N18293	2	yes
USA	20.08.08	Tropical Storm "Fay"	2008-0338	2008229N18293	11	yes
DOM	18.08.08	Tropical Storm "Fay"	2008-0338	2008229N18293	1	yes
HTI	18.08.08	Tropical Storm "Fay"	2008-0338	2008229N18293	1	yes
JAM	18.08.08	Tropical Storm "Fay"	2008-0338	2008229N18293	0	yes
THA	11.08.08	Tropical storm "Kammuri" (Julian)	2008-0329	2008217N19120	0	yes
CHN	08.08.08	Tropical storm "Kammuri" (Julian)	2008-0329	2008217N19120	11	yes
VNM	08.08.08	Tropical storm "Kammuri" (Julian)	2008-0329	2008217N19120	0	yes
HKG	05.08.08	Tropical storm "Kammuri" (Julian)	2008-0329	2008217N19120	4	yes
PHL	04.08.08	Tropical storm "Kammuri" (Julian)	2008-0329	2008217N19120	0	yes
CHN	28.07.08	Tropical Storm "Fung-Wong" (Igme)	2008-0292	2008206N22133	11	yes
PHL	28.07.08	Tropical Storm "Fung-Wong" (Igme)	2008-0292	2008206N22133	0	yes
TWN	27.07.08	Tropical Storm "Fung-Wong" (Igme)	2008-0292	2008206N22133	10	yes
USA	23.07.08	Hurricane Dolly	2008-0304	2008203N18276	1	yes
GTM	21.07.08	Hurricane Dolly	2008-0304	N/A	0	yes
MEX	20.07.08	Hurricane Dolly	2008-0304	2008203N18276	0	yes
BRB	01.01.87	Emily	1987-0535	N/A	0
TWN	18.07.08	Tropical storm "Kalmaegi"	2008-0295	2008193N20126	2
CHN	24.06.08	Typhoon Fengshen (Franck)	2008-0249	2008169N08135	2
PHL	21.06.08	Typhoon Fengshen (Franck)	2008-0249	2008169N08135	4	yes
COM	03.01.87	Jan	1987-0049	N/A	0
NIC	29.05.08	Alma	2008-0234	2008150N10274	1	yes
CRI	28.05.08	Alma	2008-0234	2008150N10274	0	yes
HND	28.05.08	Alma	2008-0234	2008150N10274	0	yes
PHL	18.05.08	Halong (Cosme)	2008-0197	2008135N12116	4
VUT	07.02.87	Uma	1987-0057	1987035S12160	0	yes
MMR	02.05.08	Cyclone Nargis	2008-0184	2008117N11090	2	yes
THA	02.05.08	Cyclone Nargis	2008-0184	2008117N11090	2	yes
LKA	27.04.08	Cyclone Nargis	2008-0184	2008117N11090	0	yes
CHN	19.04.08	Typhoon "Neoguri" (Ambo)	2008-0155	2008104N08128	2
PHL	13.04.08	Typhoon "Neoguri" (Ambo)	2008-0155	2008104N08128	1
REU	13.02.87	0	1987-0060	N/A	0
MOZ	08.03.08	Cyclone "Jokwe"	2008-0111	2008062S10064	2
MDG	05.03.08	Cyclone "Jokwe"	2008-0111	2008062S10064	7
MDG	17.02.08	Cyclone "Ivan"	2008-0070	2008037S10055	9
FJI	28.01.08	Cyclone "Gene"	2008-0051	2008026S12179	13
MDG	27.01.08	Cyclone "Fame"	2008-0043	2008023S10050	1
DOM	11.12.07	Olga	2007-0612	2007345N18298	4	yes
HTI	11.12.07	Olga	2007-0612	2007345N18298	4	yes
PRI	11.12.07	Olga	2007-0612	2007345N18298	1	yes
FJI	05.12.07	Daman	2007-0655	2007337S12186	1
PHL	25.11.07	Mitag (Mina) (23)	2007-0576	2007324N10140	0	yes
PHL	18.11.07	Hagibis (Lando) (24)	2007-0578	2007323N09128	10	yes
BGD	15.11.07	Sidr	2007-0556	2007314N10093	2
IND	15.11.07	Sidr	2007-0556	2007314N10093	2
TUV	22.02.87	0	1987-0062	N/A	0
PHL	04.11.07	Kabayan (Peipah)	2007-0560	2007306N18133	1
BHS	28.10.07	Noel	2007-0523	2007297N18300	1	yes
CUB	28.10.07	Noel	2007-0523	2007297N18300	1	yes
DOM	28.10.07	Noel	2007-0523	2007297N18300	1	yes
HTI	28.10.07	Noel	2007-0523	2007297N18300	1	yes
JAM	28.10.07	Noel	2007-0523	2007297N18300	0	yes
TWN	06.10.07	Krosa	2007-0552	2007274N18131	8
CHN	09.06.87	Ruth	1987-0344	N/A	0
USA	23.06.87	0	1987-0391	N/A	0
GNB	01.07.87	0	1987-0118	N/A	0
VNM	29.09.07	Lekima	2007-0463	2007272N17125	1
MEX	28.09.07	Lorenzo	2007-0464	2007269N22265	13
CHN	20.09.07	Wipha/Goring	2007-0457	2007257N16134	5	yes
PHL	18.09.07	Goring	2007-0668	2007257N16134	0	yes
JPN	17.09.07	Wipha/Goring	2007-0457	2007257N16134	15	yes
PRK	17.09.07	Wipha/Goring	2007-0457	2007257N16134	0	yes
PHL	17.09.07	Wipha/Goring	2007-0457	2007257N16134	0	yes
KOR	16.09.07	Nari (11)	2007-0470	2007254N18140	2
SLV	04.09.07	Felix	2007-0439	2007244N12303	0	yes
GTM	04.09.07	Felix	2007-0439	2007244N12303	0	yes
HND	04.09.07	Felix	2007-0439	2007244N12303	7	yes
MEX	04.09.07	Felix	2007-0439	2007244N12303	8	yes
NIC	04.09.07	Felix	2007-0439	2007244N12303	1	yes
MEX	01.09.07	Henriette	2007-0671	2007242N13264	0	yes
KOR	26.07.87	Vernon	1987-0349	N/A	0
JPN	28.08.07	Fitow (9)	2007-0479	2007240N17153	4
BLZ	21.08.07	Dean	2007-0360	2007225N12331	2	yes
DMA	21.08.07	Dean	2007-0360	2007225N12331	2	yes
DOM	21.08.07	Dean	2007-0360	2007225N12331	2	yes
MEX	21.08.07	Dean	2007-0360	2007225N12331	5	yes
CUB	20.08.07	Dean	2007-0360	2007225N12331	0	yes
JAM	20.08.07	Dean	2007-0360	2007225N12331	2	yes
CHN	18.08.07	Sepat	2007-0380	2007223N19136	14	yes
HTI	18.08.07	Dean	2007-0360	2007225N12331	2	yes
PHL	17.08.07	Sepat	2007-0380	2007223N19136	14	yes
LCA	17.08.07	Dean	2007-0360	2007225N12331	1	yes
TWN	17.08.07	Sepat	2007-0380	2007223N19136	14	yes
MTQ	16.08.07	Dean	2007-0360	2007225N12331	0	yes
USA	16.08.07	Erin	2007-0359	2007221N13234	2
PHL	08.08.07	Chedeng and Dodong	2007-0346	2007216N18138	1
JPN	13.07.07	Man-Yi	2007-0262	2007188N04148	2
PAK	26.06.07	Yemyin	2007-0245	2007172N15088	2
IRN	06.06.07	Gonu	2007-0164	2007151N14072	2
OMN	06.06.07	Gonu	2007-0164	2007151N14072	2
BGD	15.05.07	0	2007-0227	2007133N15091	1
FJI	05.04.07	Cliff	2007-0151	2007091S14175	1
MDG	04.04.07	Jaya	2007-0136	2007085S11085	8
VUT	11.01.88	Anne	1988-0040	1988006S05182	0
MDG	15.03.07	Indhala	2007-0095	2007066S12066	5
AUS	02.03.07	George and Jacob	2007-0591	2007058S12135	7
NZL	07.03.88	Bola	1988-0601	N/A	0
MUS	25.02.07	GamÃ¨de	2007-0085	N/A	9	yes
VUT	01.08.88	Bola	1988-0676	N/A	0
MOZ	22.02.07	Favio	2007-0080	2007043S11071	3
MDG	03.01.07	Clovis	2007-0032	2006364S12058	11
MDG	25.12.06	Bondo	2006-0687	2006350S07071	2
PHL	11.12.06	Utor (Seniang)	2006-0667	2006340N08142	11
PHL	30.11.06	Durian (Reming)	2006-0648	2006329N06150	8
VNM	30.11.06	Durian (Reming)	2006-0648	2006329N06150	2
PHL	13.11.06	Queenie (Chebi)	2006-0610	2006311N16143	11
PHL	30.10.06	Cimaron (Paeng)	2006-0600	2006298N12143	5
MEX	25.10.06	Paul	2006-0604	2006294N16254	4
CHN	01.10.06	Xangsane (Milenyo)	2006-0517	2006268N12129	11	yes
PHL	27.09.06	Xangsane (Milenyo)	2006-0517	2006268N12129	1	yes
VNM	27.09.06	Xangsane (Milenyo)	2006-0517	2006268N12129	1	yes
CHN	21.09.88	Kit	1988-0439	N/A	0
WSM	06.01.89	Fili & Gina	1989-0002	N/A	0
MEX	16.09.06	Lane	2006-0505	2006257N16259	10
JPN	15.09.06	Shanshan (13)	2006-0504	2006252N13139	8
ASM	10.01.89	Gina	1989-0561	N/A	0
MEX	02.09.06	John	2006-0483	﻿2006240N12265	15	yes
HTI	25.08.06	Ernesto	2006-0466	2006237N13298	1
CHN	06.08.06	Saomai	2006-0437	2006216N07151	15
CHN	03.08.06	Prapiroon	2006-0410	2006209N13130	11
PHL	02.08.06	Prapiroon	2006-0410	2006209N13130	5
AUS	01.04.89	Orson	1989-0399	N/A	0
CHN	24.07.06	Kaemi	2006-0388	2006198N08152	8	yes
PHL	24.07.06	Kaemi	2006-0388	2006198N08152	0	yes
TWN	24.07.06	Kaemi	2006-0388	2006198N08152	0	yes
TWN	17.07.06	Bilis	2006-0362	﻿2006198N08152	1	yes
CHN	16.07.06	Bilis	2006-0362	﻿2006198N08152	9	yes
BGD	26.05.89	0	1989-0249	N/A	0
VNM	11.07.06	Bilis	2006-0362	﻿2006198N08152	2	yes
PHL	30.06.06	Henry	2006-0415	2006174N08135	2
CUB	11.06.06	Alberto	2006-0272	2006161N20275	1
CHN	18.05.06	Chanchu (Caloy)	2006-0251	2006128N09138	3
VNM	17.05.06	Chanchu (Caloy)	2006-0251	2006128N09138	0	yes
PHL	11.05.06	Chanchu (Caloy)	2006-0251	2006128N09138	1
MMR	29.04.06	Mala	2006-0241	2006114N08090	2
JPN	01.08.89	0	1989-0161	N/A	0
PRI	04.08.89	0	1989-0416	N/A	0
AUS	30.03.06	Glenda	2006-0155	2006081S14129	14
AUS	20.03.06	Larry	2006-0139	2006074S13158	7
MDG	04.02.06	Boloetse	2006-0089	2006021S11053	3
VNM	01.10.89	Brian, Angela, Dan	1989-0128	1989279N07151	0
AUS	09.01.06	Clare	2006-0043	2006006S11129	1
MAR	28.11.05	0	2005-0662	2005324N27312	2
CHN	05.10.89	Brian	1989-0224	1989271N12142	0
HND	18.11.05	Gamma	2005-0640	2005318N13298	7
BLZ	14.11.05	Gamma	2005-0640	2005318N13298	0	yes
VNM	02.11.05	Kai Tak (21)	2005-0611	2005301N13117	8
HND	30.10.05	Beta	2005-0625	2005300N10279	10	yes
NIC	30.10.05	Beta	2005-0625	2005300N10279	10	yes
COL	29.10.05	Beta	2005-0625	2005300N10279	1	yes
USA	24.10.05	Hurricane "Wilma"	2005-0585	2005289N18282	11
DOM	22.10.05	Alpha	2005-0597	2005296N16293	1	yes
HTI	22.10.05	Alpha	2005-0597	2005296N16293	1	yes
BLZ	21.10.05	Hurricane "Wilma"	2005-0585	2005289N18282	0	yes
HND	21.10.05	Hurricane "Wilma"	2005-0585	2005289N18282	2	yes
BHS	19.10.05	Hurricane "Wilma"	2005-0585	2005289N18282	4	yes
CUB	19.10.05	Hurricane "Wilma"	2005-0585	2005289N18282	4	yes
HTI	19.10.05	Hurricane "Wilma"	2005-0585	2005289N18282	0	yes
JAM	19.10.05	Hurricane "Wilma"	2005-0585	2005289N18282	0	yes
MEX	19.10.05	Hurricane "Wilma"	2005-0585	2005289N18282	10	yes
CHN	02.10.05	Longwang	2005-0565	2005268N19146	14
TWN	02.10.05	Longwang	2005-0565	2005268N19146	5
CRI	01.10.05	Stan	2005-0567	N/A	0	yes
SLV	01.10.05	Stan	2005-0567	N/A	0	yes
GTM	01.10.05	Stan	2005-0567	N/A	0	yes
HTI	01.10.05	Stan	2005-0567	N/A	0	yes
MEX	01.10.05	Stan	2005-0567	2005271N17255	0	yes
NIC	01.10.05	Stan	2005-0567	N/A	0	yes
HND	28.09.05	Stan	2005-0567	N/A	0	yes
VNM	27.09.05	Damrey	2005-0540	2005262N13127	14	yes
CHN	26.09.05	Damrey	2005-0540	2005262N13127	0	yes
THA	26.09.05	Damrey	2005-0540	2005262N13127	0	yes
USA	23.09.05	Rita	2005-0547	2005261N21290	11	yes
PHL	21.09.05	0	1905-0004	2005262N13127	4
VNM	18.09.05	Vicente	2005-0536	2005257N15120	1
PHL	15.09.05	Damrey	2005-0540	2005262N13127	0	yes
CHN	11.09.05	Khanun (15)	2005-0510	2005248N08142	11
KOR	08.09.05	Nabi (Jolina/14W)	2005-0497	2005241N15155	0	yes
JPN	02.09.05	Nabi (Jolina/14W)	2005-0497	2005241N15155	0	yes
CHN	01.09.05	Talim	2005-0492	2005237N14148	8
TWN	01.09.05	Talim	2005-0492	2005237N14148	2
USA	29.08.05	Katrina	2005-0467	2005236N23285	5	yes
JPN	25.08.05	Mawar	2005-0464	2005237N14148	15
KOR	02.08.05	Matsa (Gorio/09W)	2005-0419	N/A	0	yes
CHN	30.07.05	Matsa (Gorio/09W)	2005-0419	﻿2005211N09141	0	yes
TWN	30.07.05	Matsa (Gorio/09W)	2005-0419	N/A	0	yes
JAM	18.07.05	Emily	2005-0382	2005192N11318	14	yes
MEX	18.07.05	Emily	2005-0382	2005192N11318	14	yes
TWN	18.07.05	Haitang (Feria/05W)	2005-0381	2005192N22155	2	yes
HTI	17.07.05	Emily	2005-0382	2005192N11318	0	yes
CHN	15.07.05	Haitang (Feria/05W)	2005-0381	2005192N22155	2	yes
VCT	14.07.05	Emily	2005-0382	2005192N11318	13	yes
TTO	14.07.05	Emily	2005-0382	2005192N11318	1	yes
USA	10.07.05	Hurricane "Dennis"	2005-0351	2005186N12299	0	yes
CUB	08.07.05	Hurricane "Dennis"	2005-0351	2005186N12299	4	yes
HTI	07.07.05	Hurricane "Dennis"	2005-0351	2005186N12299	1	yes
JAM	07.07.05	Hurricane "Dennis"	2005-0351	2005186N12299	1	yes
MDG	31.12.89	Alibera	1989-0122	1989349S08065	0
SLV	19.05.05	Adrian	2005-0732	2005138N10265	1
CHN	24.06.90	NÂ°5	1990-0037	1990166N06141	0	unclear
VNM	01.08.90	Becky	1990-0069	N/A	0
ATG	27.08.90	Gustav	1990-0052	N/A	0
GLP	27.08.90	Gustav	1990-0051	N/A	0
ASM	16.02.05	Olaf	2005-0151	2005041S13181	1
WSM	16.02.05	Olaf	2005-0151	2005041S13181	1
MDG	22.01.05	Ernest	2005-0048	2005017S09061	2
MSR	27.08.90	Gustav	1990-0053	N/A	0
PHL	30.11.04	Nanmadol (Yoyong/30W)	2004-0618	N/A	0	yes
PHL	29.11.04	Winnie	2004-0609	﻿2004327N16125	11	yes
VNM	26.11.04	Muifa (Unding/29W)	2004-0580	2004319N10134	3	yes
KNA	27.08.90	Gustav	1990-0054	N/A	0
PHL	14.11.04	Muifa (Unding/29W)	2004-0580	2004319N10134	1
MTQ	04.10.90	Klaus	1990-0070	N/A	0
BGD	08.10.90	Ofa	1990-0576	N/A	0
IND	01.11.90	0	1990-0580	N/A	0
VNM	15.11.90	0	1990-0418	1990310N07152	0
JPN	27.09.91	Mireille (nÂ°19)	1991-0539	1991256N13171	0	yes
USA	29.10.91	Grace	1991-0543	N/A	0
USA	07.01.92	Axel	1992-0106	N/A	0
IND	22.04.92	0	1992-0097	N/A	0
USA	15.09.04	Ivan	2004-0462	2004247N10332	0	yes
LAO	10.07.92	Zeke & Fred	1992-0470	N/A	0
PHL	31.08.92	Omar (Lusing)	1992-0492	N/A	0
CUB	13.09.04	Ivan	2004-0462	2004247N10332	0	yes
HTI	13.09.04	Ivan	2004-0462	2004247N10332	0	yes
CYM	12.09.04	Ivan	2004-0462	2004247N10332	0	yes
JPN	03.09.92	Yancy	1992-0314	1992236N07159	0
JAM	11.09.04	Ivan	2004-0462	2004247N10332	0	yes
THA	16.10.92	Angela	1992-0494	1992289N08135	0
DOM	09.09.04	Ivan	2004-0462	2004247N10332	0	yes
TTO	09.09.04	Ivan	2004-0462	2004247N10332	2	yes
BRB	08.09.04	Ivan	2004-0462	2004247N10332	2	yes
GRD	08.09.04	Ivan	2004-0462	2004247N10332	2	yes
LCA	08.09.04	Ivan	2004-0462	2004247N10332	0	yes
VCT	08.09.04	Ivan	2004-0462	2004247N10332	2	yes
VEN	08.09.04	Ivan	2004-0462	2004247N10332	2	yes
UKR	19.11.92	0	1992-0477	N/A	0
USA	05.09.04	Frances	2004-0455	2004238N11325	14	yes
FJI	02.01.93	Kina	1993-0002	N/A	0
BHS	02.09.04	Frances	2004-0455	2004238N11325	0	yes
DOM	02.09.04	Frances	2004-0455	2004238N11325	0	yes
TCA	01.09.04	Frances	2004-0455	2004238N11325	2	yes
PRI	31.08.04	Frances	2004-0455	2004238N11325	0	yes
GUM	30.08.04	Chaba	2004-0445	2004230N09172	3	yes
JPN	30.08.04	Chaba	2004-0445	2004230N09172	0	yes
NOR	03.01.93	0	1993-0091	N/A	0
BHS	25.08.04	Ivan	2004-0462	2004247N10332	1	yes
BGD	09.01.93	0	1993-0240	N/A	0
REU	18.01.93	Colina	1993-0103	N/A	0
JPN	23.08.04	Aere (Marce/20W)	2004-0435	N/A	8	yes
CHN	01.03.93	0	1993-0248	N/A	0
IND	09.04.93	0	1993-0138	N/A	0
KOR	15.08.04	Megi (Lawin/18W)	2004-0428	2004227N15141	1
CUB	14.08.04	Charley	2004-0415	2004223N11301	14
CYM	13.08.04	Charley	2004-0415	2004223N11301	1
JAM	13.08.04	Charley	2004-0415	2004223N11301	1
USA	13.08.04	Charley	2004-0415	2004223N11301	1
CHN	06.08.04	Rananim (Karen/16W)	2004-0412	N/A	9	yes
USA	28.04.93	0	1993-0429	N/A	0
USA	05.05.93	Wylie	1993-0431	N/A	0
GUM	27.06.04	Tingting	2004-0312	2004177N12154	0	yes
MNP	26.06.04	Tingting	2004-0312	2004177N12154	1	yes
PHL	25.06.04	Mindulle (Igme/10W)	2004-0309	2004174N14146	7
BGD	13.05.93	0	1993-0029	N/A	0
JPN	16.06.04	Dianmu (Helen/09W)	2004-0276	N/A	6	yes
MTQ	15.08.93	Cindy	1993-0195	N/A	0
CHN	10.09.93	Abe	1993-0463	N/A	0
MMR	19.05.04	0	2004-0235	2004136N15090	2
PHL	13.05.04	Nida (Dindo/04W)	2004-0218	2004134N07132	1
FJI	08.04.04	0	2004-0153	2004098S15173	1
FSM	03.04.04	Cosme (Sudal/03W)	2004-0150	2004093N07154	1
GNB	10.09.93	0	1993-0507	N/A	0
BRA	27.03.04	Catarina	2004-0131	2004086S29318	1
MDG	07.03.04	Galifo	2004-0103	2004061S12072	2
VUT	25.02.04	Ivy (P13)	2004-0080	2004052S15172	1
MDG	26.01.04	Elita	2004-0029	2003359S15177	0	yes
NIU	06.01.04	Heta	2004-0004	2003359S15177	2	yes
TON	06.01.04	Heta	2004-0004	2003359S15177	0	yes
ASM	05.01.04	Heta	2004-0004	2003359S15177	0	yes
WSM	05.01.04	Heta	2004-0004	2003359S15177	2	yes
CHN	15.09.93	Becky	1993-0464	1993253N06150	0	yes
IND	17.12.03	0	2003-0605	2003345N05092	2
MDG	09.12.03	Cela	2003-0602	2003338S09065	2
PRI	09.12.03	Odette	2003-0599	2003339N13284	0	yes
DOM	06.12.03	Odette	2003-0599	2003339N13284	1	yes
FSM	21.11.03	Lupit	2003-0577	2003319N13172	2
CHN	18.11.03	Nepartak	2003-0594	2003316N11141	2
CAN	28.09.03	Juan	2003-0487	2003268N28298	7
MEX	22.09.03	Marty	2003-0474	2003262N17254	15	yes
CAN	18.09.03	Isabel	2003-0468	2003249N14329	3
USA	18.09.03	Isabel	2003-0468	2003249N14329	12
JPN	12.09.03	Maemi	2003-0459	2003247N10153	8
KOR	12.09.03	Maemi	2003-0459	2003247N10153	2
BMU	05.09.03	Fabian	2003-0448	2003240N15329	2
HKG	02.09.03	Dujuan	2003-0443	2003240N20139	2	yes
TWN	02.09.03	Dujuan	2003-0443	2003240N20139	5	yes
CHN	01.09.03	Dujuan	2003-0443	2003240N20139	14	yes
MEX	24.08.03	Ignacio	2003-0688	2003235N20253	13
PHL	06.12.93	Lola (Monang) and Manny (Naning)	1993-0087	1993336N05164	0
JPN	08.08.03	Etau	2003-0388	2003212N09150	2	yes
RUS	08.08.03	Etau	2003-0388	2003212N09150	0	yes
PHL	04.08.03	Kabayan	2003-0824	2003212N12130	8
AUS	19.01.94	Hurricane	1994-0310	1993360S04171	0
HKG	26.07.03	Imbudo	2003-0346	2003196N04150	0	yes
CHN	24.07.03	Imbudo	2003-0346	2003196N04150	14	yes
VNM	23.07.03	Koni	2003-0437	2003196N11137	2
PHL	19.07.03	Imbudo	2003-0346	2003196N04150	15	yes
MUS	09.02.94	Hollanda, Ivy	1994-0008	N/A	0
USA	30.06.03	Bill	2003-0782	2003179N20271	1
PHL	15.06.03	Soudelor (Egay)	2003-0290	2003158N08156	11
SLB	05.06.03	Gina	2003-0314	2003155S10172	1
PHL	26.05.03	Linfa (Chedeng)	2003-0258	2003144N16119	4
MDG	08.05.03	Manou	2003-0218	2003122S11065	2
BGD	28.03.94	0	1994-0087	N/A	0
TZA	23.04.94	0	1994-0105	N/A	0
BTN	01.05.94	0	1994-0344	N/A	0
NCL	13.03.03	Erica	2003-0135	2003061S21148	5
ZWE	07.03.03	Japhet	2003-0114	2003056S21042	0	yes
MOZ	03.03.03	Japhet	2003-0114	2003056S21042	2	yes
THA	08.05.94	0	1994-0120	N/A	0
THA	28.07.94	Amy	1994-0777	N/A	0
MDG	29.01.03	Fari	2003-0065	2003021S11081	2
SLB	26.01.03	Beni	2003-0057	2003021S10163	4
FJI	14.01.03	Ami	2003-0024	2003011S09182	1
SLB	28.12.02	Zoe	2002-0811	2002358S08185	1
TWN	07.08.94	Doug	1994-0185	1994211N12152	0	yes
THA	30.08.94	Harry	1994-0774	N/A	0
BGD	14.11.02	0	2002-0705	2002314N12083	2
IND	13.11.02	0	2002-0702	2002314N12083	1
MEX	25.10.02	Kenna	2002-0669	2002295N11261	4
USA	03.10.02	Lili	2002-0724	2002265N10315	0	yes
LCA	10.09.94	Debby	1994-0216	N/A	0
CUB	01.10.02	Lili	2002-0636	2002265N10315	12	yes
CYM	30.09.02	Lili	2002-0626	2002265N10315	11	yes
HTI	30.09.02	Lili	2002-0657	2002265N10315	0	yes
JAM	30.09.02	Lili	2002-0627	2002265N10315	11	yes
SOM	01.11.94	0	1994-0631	N/A	0
MEX	25.09.02	Julio	2002-0647	2002268N15258	13
BRB	24.09.02	Lili	2002-0617	2002265N10315	1	yes
VCT	24.09.02	Lili	2002-0653	2002265N10315	1	yes
NIC	22.09.02	Isidore	2002-0850	2002258N10300	0	yes
SLV	21.09.02	Isidore	2002-0851	2002258N10300	0	yes
GTM	20.09.02	Isidore	2002-0849	2002258N10300	0	yes
MEX	20.09.02	Isidore	2002-0609	2002258N10300	8	yes
CUB	18.09.02	Isidore	2002-0604	2002258N10300	1	yes
JAM	18.09.02	Isidore	2002-0656	2002258N10300	1	yes
CYM	14.09.02	Isidore	2002-0656	2002258N10300	1	yes
CHN	13.09.02	Hagupit	2002-0599	2002252N20121	11	yes
SYC	05.09.02	0	2002-0590	2002247S03067	1
PRK	31.08.02	Rusa	2002-0561	2002234N14164	0	yes
KOR	31.08.02	Rusa	2002-0557	2002234N14164	2	yes
JPN	15.07.02	Halong	2002-0430	﻿2002187N11160	13	yes
AUS	01.02.95	Bobby	1995-0440	N/A	0
PHL	29.07.95	Karing	1995-0486	1995209N17122	0
PHL	07.07.02	Chata'an	2002-0408	2002178N04155	0	yes
GUM	05.07.02	Chata'an	2002-0432	2002178N04155	15	yes
JPN	05.07.02	Chata'an	2002-0431	2002178N04155	15	yes
FSM	01.07.02	Chata'an	2002-0397	2002178N04155	1	yes
LAO	01.08.95	0	1995-0464	N/A	0
OMN	10.05.02	0	2002-0285	2002126N09068	2
MDG	09.05.02	Kesiny	2002-0281	2002122S07063	2
MEX	08.08.95	Felix	1995-0165	1995220N15256	0
THA	09.08.95	0	1995-0167	N/A	0
CRI	06.10.95	0	1995-0267	N/A	0
MDG	09.03.02	Hary	2002-0146	2002063S11066	1
FSM	03.03.02	Mitag	2002-0126	2002057N06156	2
MUS	22.01.02	Dina	2002-0039	2002017S07078	2	yes
MDG	02.01.02	Cyprien	2002-0004	2001364S19036	1
REU	01.01.02	Dina	2002-0043	2002017S07078	0	yes
TON	31.12.01	Waka	2001-0711	2001363S10185	1
PHL	05.12.01	Kajiki (Quedan)	2001-0758	2001338N10130	4
COK	02.12.01	Trina	2001-0659	2001334S21200	1
VNM	12.11.01	Lingling (Nanang)	2001-0624	2001309N10130	2
BHS	09.11.01	Michelle	2001-0671	2001303N13276	3	yes
PHL	08.11.01	Lingling (Nanang)	2001-0614	2001309N10130	4
JAM	06.11.01	Michelle	2001-0615	2001303N13276	0	yes
CUB	04.11.01	Hurricane Michelle	2001-0612	2001303N13276	2	yes
NIC	01.11.01	Michelle	2001-0611	2001303N13276	4	yes
CYM	30.10.01	Michelle	2001-0611	2001303N13276	0	yes
HTI	30.10.01	Michelle	2001-0611	2001303N13276	0	yes
HND	30.10.01	Michelle	2001-0603	2001303N13276	0	yes
BLZ	08.10.01	Iris	2001-0553	2001278N12302	1	yes
GTM	08.10.01	Iris	2001-0570	2001278N12302	1	yes
DOM	04.10.01	Iris	2001-0570	2001278N12302	1	yes
MEX	04.10.01	Iris	2001-0570	2001278N12302	13	yes
NIC	09.10.95	0	1995-0251	N/A	0
PHL	09.10.95	Sybil (Mameng)	1995-0247	N/A	0	reject
MEX	24.09.01	Juliette	2001-0562	2001264N13269	7
TWN	16.09.01	Nari	2001-0522	2001248N23125	6	yes
JPN	10.09.01	Danas	2001-0511	N/A	0	yes
CHN	28.08.01	Fitow	2001-0796	2001239N19116	7
BLZ	21.08.01	Chantal	2001-0736	2001227N13323	2
JPN	21.08.01	Pabuk	2001-0454	2001225N18146	8
MEX	21.08.01	Chantal	2001-0735	2001227N13323	5
VNM	11.08.01	Usagi	2001-0436	2001220N17118	4
TWN	30.07.01	Toraji	2001-0405	2001206N14134	8	yes
CHN	25.07.01	Toraji	2001-0405	2001206N14134	0	yes
MEX	25.07.01	Dalila	2001-0488	2001202N11266	1
CHN	24.07.01	Yutu	2001-0419	﻿2001204N19127	7	yes
TWN	11.07.01	Trami	2001-0415	2001189N13130	7	yes
TWN	06.07.01	Utor	2001-0359	N/A	0	yes
VNM	04.07.01	Durian	2001-0318	N/A	2	yes
CHN	01.07.01	Durian and Utor	2001-0322	N/A	0	yes
PHL	01.07.01	Utor (Feria)	2001-0319	2001181N08141	13	yes
TWN	24.06.01	Chebi	2001-0293	2001170N11138	2
CHN	23.06.01	Chebi	2001-0292	2001170N11138	1
IND	20.10.95	0	1995-0462	N/A	0
USA	05.06.01	Allison	2001-0242	2001157N28265	1
AUS	01.04.96	Olivia	1996-0318	1996095S09133	0	yes
IND	02.07.96	0	1996-0180	N/A	0
VUT	07.04.01	Sose	2001-0143	2001094S12172	4
CHN	31.07.96	Herb	1996-0168	1996203N12152	0	yes
FJI	01.03.01	Paula	2001-0223	2001056S11163	1
VUT	28.02.01	Paula	2001-0093	2001056S11163	1
PHL	17.02.01	Auring	2001-0054	2001047N09134	1
LKA	24.12.00	04B	2000-0831	2000358N08086	7
AUS	07.12.00	Sam	2000-0843	2000333S11140	1
TWN	31.07.96	Herb	1996-0168	1996203N12152	0	yes
IND	29.11.00	03B	2000-0785	2000331N09092	4
PHL	03.11.00	Bebinca (Seniang)	2000-0715	2000305N06136	15
TWN	01.11.00	Xangsane (Reming)	2000-0706	2000299N08139	2
BGD	28.10.00	0	2000-0713	2000299N13093	1
PHL	28.10.00	Xangsane (Reming)	2000-0706	2000299N08139	1
VNM	14.08.96	0	1996-0500	N/A	0
HTI	09.11.96	Marcos	1996-0502	N/A	0
SLV	01.10.00	Keith	2000-0645	2000273N16277	0	yes
BLZ	30.09.00	Keith	2000-0642	2000273N16277	1	yes
MEX	29.09.00	Keith	2000-0643	2000273N16277	15	yes
NIC	29.09.00	Keith	2000-0644	2000273N16277	0	yes
KOR	16.09.00	Saomai	2000-0601	2000245N14157	0	yes
RUS	13.09.00	Saomai	2000-0576	2000258N22138	0	yes
JPN	11.09.00	Saomai	2000-0576	N/A	14	yes
VNM	10.09.00	Wukong	2000-0582	2000248N17117	8
CHN	09.09.00	Wukong	2000-0605	2000248N17117	14
HND	09.11.96	Marcos	1996-0502	N/A	0
NIC	09.11.96	Marcos	1996-0502	N/A	0
PRK	31.08.00	Prapiroon "12"	2000-0572	2000237N08138	2
KOR	31.08.00	Prapiroon (Typhoon nÂ°12)	2000-0550	2000237N08138	2
CHN	23.08.00	Bilis	2000-0533	2000230N08139	8
TWN	22.08.00	Bilis	2000-0517	2000230N08139	2
THA	21.08.00	Kaemi	2000-0539	2000232N12116	0	yes
VNM	20.08.00	Kaemi	2000-0518	2000232N12116	1	yes
CHN	01.08.00	Prapiroon	2000-0556	2000214N22155	7
JPN	08.07.00	Kirogi	2000-0447	N/A	0	yes
JAM	21.11.96	Marco	1996-0266	N/A	0
PHL	05.07.00	Kirogi	2000-0396	2000185N15117	4	yes
MUS	09.12.96	Daniella	1996-0311	N/A	0
PHL	24.05.97	Bining	1997-0203	N/A	0
SLV	09.06.97	Andres	1997-0126	N/A	0
BLR	23.06.97	0	1997-0200	N/A	0
UKR	23.06.97	0	1997-0200	N/A	0
GUM	17.12.97	Paka	1997-0292	1997333N06194	0	yes
AUS	27.02.00	Steve	2000-0097	2000056S17152	4
PER	24.12.97	0	1997-0530	N/A	0
MDG	17.02.00	Eline, Gloria	2000-0107	2000032S11116	3
USA	21.08.98	Charley	1998-0277	1998232N15312	0
MTQ	19.11.99	Lenny	1999-0530	1999318N17278	0	yes
AIA	17.11.99	Lenny	1999-0528	1999318N17278	4	yes
ATG	17.11.99	Lenny	1999-0525	1999318N17278	4	yes
DMA	17.11.99	Lenny	1999-0615	1999318N17278	4	yes
GLP	17.11.99	Lenny	1999-0529	1999318N17278	0	yes
KNA	17.11.99	Lenny	1999-0526	1999318N17278	4	yes
LCA	17.11.99	Lenny	1999-0556	1999318N17278	0	yes
VCT	17.11.99	Lenny	1999-0614	1999318N17278	0	yes
VIR	17.11.99	Lenny	1999-0557	1999318N17278	4	yes
COL	15.11.99	Lenny	1999-0557	1999318N17278	0	yes
GRD	15.11.99	Lenny	1999-0527	1999318N17278	0	yes
PRI	15.11.99	Lenny	1999-0557	1999318N17278	7	yes
IND	28.10.99	05B	1999-0425	1999298N12099	13	yes
BGD	25.10.99	05B	1999-0532	1999298N12099	0	yes
ATG	20.10.99	Jose	1999-0438	1999291N10309	1
IND	18.10.99	0	1999-0401	1999288N15093	1
USA	15.10.99	Irene	1999-0435	1999286N16278	7
CUB	14.10.99	Hurricane "Irene"	1999-0400	1999286N16278	1
CHN	09.10.99	Dan	1999-0392	1999275N16135	11
PHL	05.10.99	Dan (Pepang)	1999-0390	1999275N16135	7
JPN	22.09.99	Bart	1999-0326	1999260N20130	0	yes
KOR	22.09.99	Bart	1999-0398	1999260N20130	0	yes
HKG	16.09.99	York	1999-0319	1999255N17124	4
MEX	02.09.98	Isis	1998-0281	1998242N14252	0
USA	13.09.99	Floyd	1999-0327	1999251N15314	8	yes
BHS	07.09.99	Floyd	1999-0327	1999251N15314	13	yes
MEX	06.09.99	Greg	1999-0328	1999248N17256	10
CHN	04.09.99	Wendy	1999-0301	1999241N12133	11
TJK	01.01.99	0	1999-0036	N/A	0
USA	28.08.99	Dennis	1999-0619	1999236N22292	13
CHN	23.08.99	Sam	1999-0625	1999230N12129	8
USA	22.08.99	Bret	1999-0298	1999231N20266	1
IND	20.05.99	O2a	1999-0177	1999135N12073	2
PAK	20.05.99	2-A	1999-0178	1999135N12073	2
AUS	19.03.99	Vance	1999-0092	N/A	0	yes
MUS	10.03.99	Davina	1999-0089	1999060S10089	5
NCL	23.02.99	Frank	1999-0061	1999048S21152	11
AUS	02.02.99	Rona	1999-0051	1999040S15147	0	yes
FJI	19.01.99	Dani	1999-0023	N/A	0
RUS	01.09.99	0	1999-0299	N/A	0
TON	26.12.98	Cora	1998-0440	1998355S14187	1
VNM	16.12.98	Faith & Gil	1998-0434	1998342N06141	0	yes
PHL	11.12.98	Faith (Norming)	1998-0404	1998342N06141	1	yes
BGD	25.11.98	07B	1998-0373	1998320N10102	2
VNM	13.11.98	Chip, Elvis , Dawn	1998-0374	1998315N09116	4
GTM	26.10.98	Mitch	1998-0371	1998295N12284	1	yes
PAN	26.10.98	Mitch	1998-0376	1998295N12284	0	yes
BLZ	25.10.98	Mitch	1998-0377	1998295N12284	0	yes
CRI	25.10.98	Mitch	1998-0375	1998295N12284	0	yes
SLV	25.10.98	Mitch	1998-0343	1998295N12284	1	yes
HND	25.10.98	Mitch	1998-0345	1998295N12284	1	yes
NIC	25.10.98	Mitch	1998-0344	1998295N12284	1	yes
TWN	23.10.98	Babs	1998-0603	1998285N12149	12	yes
MEX	22.10.98	Mitch	1998-0345	1998295N12284	15	yes
CHN	21.10.98	Babs (Loleng)	1998-0314	1998285N12149	12	yes
PHL	21.10.98	Babs (Loleng)	1998-0314	1998285N12149	0	yes
IND	18.10.98	0	1998-0313	1998285N14068	1
JPN	13.10.98	Zeb	1998-0311	1998281N11151	11	yes
PHL	13.10.98	Zeb (Iliang)	1998-0309	1998281N11151	15	yes
TWN	13.10.98	Zeb	1998-0310	1998281N11151	0	yes
CUB	22.09.98	Georges	1998-0381	1998259N10335	2	yes
JPN	22.09.98	Vicky (7) and Waldo (8)	1998-0297	1998259N17118	15	yes
ATG	20.09.98	Georges	1998-0383	1998259N10335	2	yes
DOM	20.09.98	Georges	1998-0295	1998259N10335	2	yes
GLP	20.09.98	Georges	1998-0380	1998259N10335	0	yes
HTI	20.09.98	Georges	1998-0380	1998259N10335	2	yes
KNA	20.09.98	Georges	1998-0382	1998259N10335	2	yes
USA	20.09.98	Georges	1998-0380	1998259N10335	15	yes
VIR	20.09.98	Georges	1998-0380	1998259N10335	2	yes
JPN	18.09.98	Stella	1998-0328	N/A	0	yes
PHL	18.09.98	Vicky and Todd (Emang and Gading)	1998-0296	1998259N17118	4
USA	08.09.98	Frances	1998-0611	﻿1998252N26266	15	yes
MEX	04.09.98	Madeline & Lester	1998-0294	N/A	5	yes
CHN	15.09.99	York	1999-0374	1999255N17124	0
PRI	01.09.98	Georges	1998-0383	1998259N10335	0	yes
JPN	27.08.98	Rex	1998-0278	1998235N17131	2
REU	30.01.00	Connie	2000-0037	N/A	0
USA	19.08.98	Bonnie	1998-0610	N/A	1	yes
IND	09.06.98	03A	1998-0183	1998152N11075	8
BGD	20.05.98	01B	1998-0164	1998133N04086	2
VUT	21.03.98	Yali, Zuman	1998-0090	1998076S11170	1
TON	07.01.98	Ron	1998-0051	1998001S09195	2
MOZ	18.02.00	Eline, Gloria	2000-0107	2000032S11116	0
MDG	02.04.00	Hudah	2000-0178	N/A	0
MEX	11.11.97	Rick	1997-0275	1997311N09258	4
COK	07.11.97	Martin	1997-0259	﻿1997302S08199	3	yes
VNM	02.11.97	Linda	1997-0267	1997298N06140	5
KHM	01.11.97	Linda	1997-0267	1997298N06140	5
PHL	20.10.97	Ivan	1997-0252	1997283N07177	3
MEX	07.10.97	Pauline	1997-0243	1997279N12263	13
THA	01.10.97	Linda	1997-0267	N/A	3	yes
MEX	27.09.97	Olaf	1997-0238	1997270N11265	13
BGD	26.09.97	2 B	1997-0235	1997263N14084	2
VNM	20.09.97	Fritz	1997-0358	1997261N13114	4
JPN	16.09.97	Oliwa	1997-0214	1997252N10171	11
MYS	23.08.97	Zita	1997-0559	1997232N17115	0	yes
IND	22.08.97	0	1997-0226	1997232N20088	10
VNM	22.08.97	Zita	1997-0186	1997232N17115	1	yes
CHN	19.08.97	Zita	1997-0186	1997232N17115	0	yes
THA	19.08.97	Zita	1997-0184	1997232N17115	0	yes
JPN	18.08.97	Winnie	1997-0180	1997217N06168	9	yes
PRK	18.08.97	Winnie	1997-0180	1997217N06168	0	yes
PHL	18.08.97	Winnie	1997-0180	1997217N06168	0	yes
TWN	18.08.97	Winnie	1997-0178	1997217N06168	0	yes
CHN	15.08.97	Winnie	1997-0179	1997217N06168	12	yes
CHN	02.08.97	Victor	1997-0168	1997210N15120	2
HKG	02.08.97	Victor	1997-0168	1997210N15120	2
USA	18.07.97	Danny	1997-0346	1997198N27267	1
MOZ	02.04.00	Hudah	2000-0178	N/A	0
AUS	03.04.00	Tessi	2000-0214	N/A	0
BGD	11.04.00	0	2000-0229	N/A	0
BGD	21.04.00	0	2000-0211	N/A	0
BGD	18.05.97	One Bravo (01B)	1997-0114	1997133N03092	2
TON	16.03.97	Hina	1997-0094	1997071S13176	1
PNG	11.03.97	Justin	1997-0093	1997062S16158	2
FJI	10.03.97	Gavin	1997-0039	1997061S08171	5
MDG	11.02.97	Josie	1997-0020	1997032S17055	9
MDG	24.01.97	Gretelle	1997-0013	1997018S11059	5	yes
MOZ	24.01.97	Gretelle	1997-0013	1997018S11059	0	yes
MYS	26.12.96	Greg	1996-0282	1996356N08110	2
PHL	18.05.00	Biring	2000-0257	2000141N18116	0
IND	04.12.96	0	1996-0298	1996332N09092	5
PHL	07.07.00	Kai-Tak (Edeng)	2000-0397	N/A	0
CHN	01.09.00	Maria	2000-0557	N/A	0
USA	08.09.00	0	1900-0003	2000259N20273	0
USA	04.10.00	Leslie	2000-0652	N/A	0
IND	06.11.96	07B	1996-0256	1996306N15097	11
BGD	29.10.96	0	1996-0351	1996296N09093	2
FRA	27.10.96	Lilli	1996-0252	1996289N13280	0	yes
IRL	27.10.96	Lilli	1996-0252	1996289N13280	3	yes
GBR	27.10.96	Lilli	1996-0252	1996289N13280	3	yes
DEU	26.10.96	Lilli	1996-0252	1996289N13280	0	yes
CUB	17.10.96	Lilli	1996-0231	1996289N13280	1	yes
VNM	21.09.96	Willie	1996-0227	1996260N19107	11
CHN	20.09.96	Willie	1996-0226	1996260N19107	13
MEX	14.09.96	Fausto	1996-0203	1996254N14258	7
VNM	09.09.96	Sally	1996-0202	N/A	15	yes
CAN	08.09.96	Hortense	1996-0201	1996248N15319	11
CHN	08.09.96	Sally	1996-0202	N/A	15	yes
MTQ	08.09.96	Hortense	1996-0201	N/A	0	yes
USA	05.09.96	Fran	1996-0199	﻿1996237N14339	12	yes
DOM	03.09.96	Hortense	1996-0201	1996248N15319	1	yes
PRI	03.09.96	Hortense	1996-0201	1996248N15319	1	yes
MEX	31.08.96	Elida	1996-0198	N/A	6	yes
JPN	14.08.96	Kirk	1996-0347	1996210N05156	0	yes
IND	17.10.00	0	2000-0323	2000299N13093	0
CHN	06.08.96	Kirk	1996-0493	1996217N16111	10	yes
PHL	30.11.00	Rumbia (Toyang)	2000-0788	N/A	0	reject
BGD	01.04.01	0	2001-0202	N/A	0
CRI	29.07.96	Cesar and Douglas	1996-0101	1996207N12297	2	yes
GTM	28.07.96	Cesar and Douglas	1996-0172	1996211N13270	0	yes
HND	28.07.96	Cesar and Douglas	1996-0172	1996207N12297	1	yes
MEX	28.07.96	Cesar and Douglas	1996-0172	1996211N13270	0	yes
NIC	28.07.96	Cesar and Douglas	1996-0102	1996207N12297	1	yes
TWN	27.07.96	Gloria	1996-0371	1996201N07137	0	yes
SLV	26.07.96	Cesar and Douglas	1996-0172	1996207N12297	1	yes
CHN	24.07.96	Gloria	1996-0108	1996201N07137	15	yes
VNM	24.07.96	Frankie	1996-0110	1996202N17115	2
THA	18.07.96	Gloria and Frankie	1996-0182	1996201N07137	0	yes
PHL	15.07.96	Gloria	1996-0108	1996201N07137	0	yes
VGB	08.07.96	Luis	1996-0325	1996187N10326	1
BGD	11.05.01	0	2001-0198	N/A	0
MEX	23.06.96	Alma, Boris	1996-0152	1996172N13261	1
IND	14.06.96	3	1996-0106	1996163N08088	4
BGD	12.05.96	0	1996-0086	N/A	3	yes
IND	28.05.01	01A	2001-0729	N/A	0
MOZ	13.02.96	Bonita	1996-0052	1996001S08075	4	yes
MDG	10.01.96	Bonita	1996-0060	1996001S08075	3	yes
BGD	25.11.95	0	1995-0281	1995323N05097	2
IND	10.11.95	0	1995-0275	1995310N09096	2
PHL	03.11.95	Angela (Rosing)	1995-0271	1995293N05177	0	yes
VNM	01.11.95	Zack	1995-0274	1995294N05163	0	yes
PHL	28.10.95	Zack (Pepang)	1995-0272	1995294N05163	0	yes
CHN	19.06.01	0	2001-0475	N/A	0
MEX	10.10.95	Roxane	1995-0256	1995281N14278	13
IND	01.10.01	0	2001-0584	N/A	0
MEX	03.10.01	Lorena	2001-0572	N/A	0
IND	03.04.02	0	2002-0204	N/A	0
CUB	04.10.95	Opal	1995-0244	1995271N19273	0	yes
USA	04.10.95	Opal	1995-0245	1995271N19273	5	yes
MEX	30.09.95	Opal	1995-0244	1995271N19273	13	yes
BRB	18.09.95	Marylin	1995-0213	1995256N12309	2	yes
VGB	18.09.95	Marilyn	1995-0214	1995256N12309	8	yes
JPN	15.09.95	Oscar	1995-0484	1995258N14115	15
VIR	15.09.95	Marilyn	1995-0208	1995256N12309	10	yes
DMA	14.09.95	Marilyn	1995-0208	1995256N12309	10	yes
MTQ	14.09.95	Marilyn	1995-0208	1995256N12309	0	yes
MEX	14.09.95	Ismael	1995-0207	1995256N15253	13
USA	14.09.95	Marilyn	1995-0208	1995256N12309	0	yes
PRI	13.09.95	Marilyn	1995-0208	1995256N12309	10	yes
CAN	11.09.95	Luis	1995-0192	1995240N11337	0	yes
ATG	05.09.95	Luis	1995-0192	1995240N11337	14	yes
MEX	05.09.95	Henriette	1995-0191	1995244N16256	10
ANT	05.09.95	Luis	1995-0193	1995240N11337	0	yes
KNA	05.09.95	Luis	1995-0212	1995240N11337	14	yes
DMA	03.09.95	Luis	1995-0211	1995240N11337	14	yes
GLP	03.09.95	Luis	1995-0192	1995240N11337	0	yes
MSR	03.09.95	Luis	1995-0192	1995240N11337	14	yes
PRI	03.09.95	Luis	1995-0194	1995240N11337	2	yes
VIR	03.09.95	Luis	1995-0192	1995240N11337	2	yes
CHN	30.08.95	Kent	1995-0188	1995236N10134	0	yes
PHL	28.08.95	Kent (Gening)	1995-0187	1995236N10134	7	yes
KOR	24.08.95	Janis	1995-0183	1995229N12144	5
BGD	22.04.02	0	2002-0233	N/A	0
MMR	04.05.02	0	1902-0005	2002129N08096	0
PHL	28.06.02	Rammasun (Florita)	2002-0528	N/A	0
BHS	31.07.95	Erin	1995-0404	1995212N22287	1	yes
USA	31.07.95	Erin	1995-0404	1995212N22287	0	yes
TWN	09.07.02	Nakri	2002-0415	N/A	0
KOR	23.07.95	Faye	1995-0393	1995193N06156	3
CUB	03.06.95	Allison	1995-0102	1995154N17276	1	yes
HND	03.06.95	Allison	1995-0117	1995154N17276	0	yes
PHL	13.07.02	Halong (Anday)	2002-0423	N/A	0
PHL	19.12.94	Axel (Garding)	1994-0594	1994345N06165	2
CUB	13.11.94	Gordon	1994-0505	1994313N12278	2	yes
USA	13.11.94	Gordon	1994-0510	1994313N12278	2	yes
HTI	05.11.94	Gordon	1994-0510	1994313N12278	0	yes
USA	26.09.02	Isidore	2002-0652	N/A	0
IND	31.10.94	0	1994-0352	1994302N11086	1
PHL	18.10.94	Teresa (Katring)	1994-0519	1994287N14156	4	yes
JPN	29.09.94	Orchid	1994-0787	1994259N12128	12
VNM	17.09.94	Luke	1994-0658	1994250N14133	11
PHL	10.09.94	Luke (Weling)	1994-0215	1994250N14133	4
RUS	02.10.02	Hygos	2002-0635	N/A	0
TWN	01.09.94	Gladys	1994-0314	1994231N12157	9
GUM	08.12.02	Pongsona	2002-0753	N/A	0
CHN	21.08.94	Fred (9416)	1994-0198	1994224N20152	0	yes
JPN	21.08.94	Fred (9416)	1994-0198	1994224N20152	15	yes
TWN	21.08.94	Fred (9416)	1994-0198	1994224N20152	0	yes
MNP	08.12.02	Pongsona	2002-0826	N/A	0
CHN	06.08.94	9403	1994-0067	N/A	15	yes
PHL	02.08.94	Caitlin (Pasing)	1994-0074	1994210N16144	0	yes
KOR	01.08.94	Brendan	1994-0175	﻿1994206N14131	15	yes
TWN	01.08.94	Caitlin	1994-0776	1994210N16144	0	yes
COD	02.02.03	0	2003-0073	N/A	0
PHL	19.07.94	Yunya (Norming)	1994-0071	1994197N14115	13
PHL	15.07.94	Oyang	1994-0313	﻿1994206N14131	14	yes
CHN	10.07.94	Tim	1994-0163	1994186N09139	14	yes
PHL	10.07.94	Tim (Iliang)	1994-0072	1994186N09139	0	yes
RUS	10.07.94	Tim	1994-0163	1994186N09139	0	yes
TWN	10.07.94	Tim	1994-0640	1994186N09139	2	yes
PHL	07.07.94	Vanessa	1994-0756	1994186N09139	10
USA	01.07.94	Alberto	1994-0152	1994181N22276	1
PHL	23.06.94	Sharon (Gading)	1994-0073	1994169N06152	5
CHN	08.06.94	Russ	1994-0138	1994153N19113	2
IND	18.02.03	0	2003-0100	N/A	0
BGD	02.05.94	0	1994-0044	1994117N07096	2
MMR	02.05.94	0	1994-0615	1994117N07096	2
IND	12.04.03	0	2003-0234	N/A	0
IND	22.04.03	0	2003-0182	N/A	0
PHL	09.04.94	Owen (Bising)	1994-0034	1994088N09148	3
BGD	04.05.03	0	2003-0211	N/A	0
MOZ	26.03.94	Nadya	1994-0035	1994076S14078	2
MDG	23.03.94	Nadya	1994-0036	1994076S14078	11
MDG	16.03.94	Litanne	1994-0037	1994064S13099	9
PHL	15.07.03	Gilas (Koni)	2003-0822	2003196N11137	0
PHL	30.07.03	Ineng	2003-0823	N/A	0
MDG	13.01.94	Daisy, Geralda	1994-0009	1994007S16056	2
PHL	26.12.93	Nell (Puring)	1993-0228	1993353N05159	8
VNM	08.12.93	Lola	1993-0231	1993336N05164	14
JAM	10.08.03	0	1903-0008	N/A	0
IND	04.12.93	0	1993-0085	1993331N07108	2
VNM	23.11.93	Kyle	1993-0088	1993322N09137	2
PHL	20.11.93	Kyle	1993-0088	1993322N09137	7
PAK	14.11.93	0	1993-0304	1993316N11070	1
CHN	28.10.93	Ira	1993-0466	1993298N11154	4	yes
HKG	28.10.93	Ira	1993-0471	1993298N11154	0	yes
PHL	04.10.93	Flo (Kadiang)	1993-0077	1993271N14134	8	yes
MAC	26.09.93	Dot	1993-0479	1993261N11131	11
CHN	24.09.93	Dot	1993-0465	1993261N11131	11
HKG	23.09.93	Dot	1993-0470	1993261N11131	14
BGD	20.12.03	0	2003-0779	N/A	0
IDN	30.03.04	0	2004-0144	N/A	0
THA	04.06.04	Chanthu (Gener/08W)	2004-0258	N/A	0
MEX	10.09.93	Lidia	1993-0204	1993252N11265	13
JPN	05.09.93	Yancy	1993-0079	1993246N16129	15
USA	28.08.93	Emily	1993-0201	1993235N20307	2
MEX	23.08.93	Irwin	1993-0198	1993233N13260	15
CHN	21.08.93	Tasha	1993-0199	1993224N07153	15	yes
HKG	20.08.93	Tasha	1993-0468	1993224N07153	2	yes
MAC	20.08.93	Tasha	1993-0477	1993224N07153	2	yes
VNM	07.06.04	Chanthu (Gener/08W)	2004-0258	N/A	0
NIC	10.08.93	Bret	1993-0053	1993217N10320	2
JPN	08.08.93	Robyn	1993-0473	1993211N07161	14	yes
PRK	08.08.93	Robyn	1993-0473	1993211N07161	0	yes
VEN	06.08.93	Bret	1993-0059	1993217N10320	1	yes
TTO	07.07.93	Bret	1993-0057	1993217N10320	0	yes
MEX	01.07.93	Calvin	1993-0060	1993178N14265	13
HKG	27.06.93	Koryn	1993-0181	1993164N04160	3	yes
MAC	27.06.93	Koryn	1993-0476	1993164N04160	3	yes
PHL	26.06.93	Koryn (Goring)	1993-0055	1993164N04160	0	yes
CHN	22.06.93	Koryn	1993-0461	1993164N04160	2	yes
MEX	22.06.93	Arlene, Beatriz	1993-0174	N/A	1	yes
PNG	14.05.93	Adel	1993-0016	1993131S04158	1
KOR	18.06.04	Dianmu (Helen/09W)	2004-0276	N/A	0
TWN	29.06.04	Mindulle (Igme/10W)	2004-0309	N/A	0
RUS	22.07.04	0	2004-0388	N/A	0
JPN	17.08.04	Megi (Lawin/18W)	2004-0428	2004227N15141	0	yes
VUT	30.03.93	Prema	1993-0024	1993083S12181	2
CHN	20.08.04	Aere (Marce/20W)	2004-0435	N/A	0
TWN	24.08.04	Aere (Marce/20W)	2004-0435	N/A	0
PHL	25.08.04	Aere (Marce/20W)	2004-0435	N/A	0
SLB	04.01.93	Nina	1993-0007	1992357S13143	3	yes
USA	29.08.04	Gaston	2004-0448	2004241N32282	0	yes
TUV	03.01.93	Nina	1993-0006	1992357S13143	0	yes
JPN	03.09.04	Songda (Nina/22W)	2004-0459	N/A	0
FJI	11.12.92	Joni	1992-0162	1992338S04173	2
KOR	06.09.04	Songda (Nina/22W)	2004-0459	N/A	0
VNM	23.10.92	Angela	1992-0143	1992289N08135	14
THA	17.10.92	Colleen	1992-0495	﻿1992289N08135	15	yes
RUS	10.09.04	Songda (Nina/22W)	2004-0459	N/A	0
KOR	22.09.92	Ted	1992-0486	1992259N11159	2
CHN	21.09.92	Ted	1992-0302	﻿1992259N11159	15	yes
USA	11.09.92	Iniki	1992-0271	1992249N12229	8
TWN	12.09.04	Haima	2004-0468	N/A	0
PRI	14.09.04	Jeanne	2004-0473	N/A	0
CHN	29.08.92	Polly	1992-0357	1992237N14144	0	yes
TWN	29.08.92	Polly	1992-0357	1992237N14144	0	yes
GUM	28.08.92	Omar	1992-0344	1992236N07159	7
USA	24.08.92	Andrew	1992-0066	1992230N11325	15	yes
BHS	23.08.92	Andrew	1992-0065	1992230N11325	2	yes
MEX	23.08.92	Lester	1992-0342	1992233N16254	7
HKG	20.07.92	Gari (Ditang)	1992-0463	1992194N07140	2
PHL	20.07.92	Gary	1992-0296	1992199N14131	10
PHL	11.07.92	Eli (Konsing)	1992-0295	1992188N07156	2
VIR	15.09.04	Jeanne	2004-0473	N/A	0
VNM	29.06.92	Chuck	1992-0061	1992174N13126	2
DOM	16.09.04	Jeanne	2004-0473	N/A	0
VUT	09.03.92	Fran	1992-0050	1992064S10184	14
VUT	09.01.92	Betsy	1992-0001	1992005S07172	2
HTI	17.09.04	Jeanne	2004-0473	N/A	0
WSM	07.12.91	Val & Wasa	1991-0364	1991338S08181	1
MHL	28.11.91	Zelda	1991-0456	1991329N04181	1
IND	12.11.91	4B	1991-0374	1991313N10095	10
PHL	05.11.91	Thelma (Uring)	1991-0383	N/A	15	yes
USA	30.10.91	Bob	1991-0423	1991302N44301	1
JPN	23.09.04	Meari (Quinta/25W)	2004-0492	N/A	0
PHL	27.10.91	Ruth (Trining)	1991-0382	1991289N06156	6	yes
BHS	25.09.04	Jeanne	2004-0473	N/A	0
JPN	19.09.91	Luke	1991-0537	N/A	0	yes
JPN	14.09.91	Kinna	1991-0536	N/A	0	yes
KOR	23.08.91	Gladys	1991-0385	1991226N18159	6
JPN	20.08.91	Gladys	1991-0384	1991226N18159	14
USA	18.08.91	Bob	1991-0218	1991228N26286	1
THA	17.08.91	0	1991-0710	1991220N10133	2
VNM	17.08.91	Fred	1991-0210	1991220N10133	8	yes
HKG	15.08.91	Fred	1991-0220	1991220N10133	0	yes
TWN	15.08.91	Fred	1991-0221	1991220N10133	5	yes
CHN	13.08.91	Fred	1991-0225	1991220N10133	0	yes
JPN	26.07.91	Caitlin	1991-0526	1991200N05157	2	yes
PHL	26.07.91	Caitlin	1991-0525	1991200N05157	0	yes
PHL	22.07.91	Brendan	1991-0174	1991196N06153	14
CHN	20.07.91	Amy	1991-0171	N/A	0	yes
PHL	18.07.91	Amy	1991-0521	N/A	0	yes
VNM	13.07.91	Zeke	1991-0713	1991187N06139	2
CHN	10.07.91	Zeke	1991-0518	1991187N06139	1
PHL	10.07.91	Zeke (Etang)	1991-0517	1991187N06139	7
BGD	29.04.91	Gorky (02B)	1991-0120	1991113N10091	2
MDG	16.02.91	Cynthia	1991-0344	1991047S16041	1
MUS	25.01.91	Bella	1991-0125	1991013S04096	3
AUS	25.12.90	Joy	1990-0422	1990350S11165	12
FJI	28.11.90	Sina	1990-0121	1990327S07175	2
USA	25.09.04	Jeanne	2004-0473	N/A	0
PHL	12.11.90	Mike (Ruping)	1990-0122	1990310N07152	2
JPN	03.10.04	Ma-on (Rolly/26W)	2004-0511	N/A	0
VNM	23.10.90	0	1990-0608	1990288N15118	14
JPN	15.10.04	Tokage (Siony/27W)	2004-0524	N/A	0
THA	08.10.90	Ira	1990-0409	﻿1990272N11121	5	yes
TWN	22.10.04	Nock-ten (Tonyo/28W)	2004-0535	N/A	0
JPN	17.09.90	Flo	1990-0407	1990251N06171	11
CHN	08.09.90	Dot	1990-0405	1990245N16149	15	yes
PHL	08.09.90	Dot	1990-0687	1990245N16149	10	yes
TWN	08.09.90	Dot	1990-0688	1990245N16149	5
CHN	31.08.90	0	1990-0592	N/A	0	yes
CHN	30.08.90	Abe	1990-0402	1990235N10152	14	yes
PHL	30.08.90	Abe	1990-0401	1990235N10152	0	yes
PHL	28.08.90	Becky	1990-0400	1990232N13141	2
PHL	23.11.04	Merbok (Violeta)	2004-0602	2004327N16125	0
TWN	04.12.04	Nanmadol (Yoyong/30W)	2004-0618	N/A	0
COK	28.02.05	Percy	2005-0102	N/A	0
TKL	28.02.05	Percy	2005-0102	N/A	0
CHN	20.08.90	Yancy	1990-0078	﻿1990221N07162	13	yes
MEX	08.08.90	Diana	1990-0393	1990216N13281	10
PHL	15.03.05	Roke (Auring/02W)	2005-0120	N/A	0
CHN	31.07.90	Tasha	1990-0390	1990202N13130	14
BHS	27.07.90	Arthur	1990-0042	1990203N09318	0	yes
HTI	27.07.90	Arthur	1990-0041	1990203N09318	0	yes
TCA	27.07.90	Arthur	1990-0043	1990203N09318	0	yes
GRD	26.07.90	Arthur	1990-0046	1990203N09318	1	yes
TTO	25.07.90	Arthur	1990-0044	1990203N09318	0	yes
CHN	29.06.90	NÂ°6	1990-0038	1990171N11148	14
BGD	31.03.05	0	2005-0190	N/A	0
TWN	23.06.90	0	1990-0581	1990166N06141	15	yes
PHL	22.06.90	Ofelia (Biring) & Percy	1990-0025	1990171N11148	15
IND	09.05.90	02B	1990-0019	1990124N09088	2
COK	14.02.90	Peni	1990-0013	1990043S09206	1
NIU	04.02.90	Ofa	1990-0007	1990028S10183	2	yes
TON	04.02.90	Ofa	1990-0008	1990028S10183	0	yes
TUV	04.02.90	Ofa	1990-0010	1990028S10183	0	yes
WSM	01.02.90	Ofa	1990-0003	1990028S10183	1	yes
TKL	01.02.90	Ofa	1990-0006	1990028S10183	0	yes
MEX	29.06.05	Bret	2005-0524	N/A	0
PHL	22.11.89	Hunt (Unsing)	1989-0132	1989314N10152	6
IND	09.11.89	0	1989-0234	1989305N07105	2
THA	03.11.89	Gay	1989-0131	1989305N07105	7
USA	15.10.89	Jerry	1989-0464	1989286N19268	7
PHL	14.10.89	Elsie (Tasing)	1989-0126	1989286N14137	15	yes
PHL	09.10.89	Dan (Saling)	1989-0125	1989279N07151	13	yes
SPI	27.11.05	0	2005-0662	N/A	0
PHL	02.10.89	Angela (Rubing)	1989-0127	1989271N12142	7
FJI	29.01.06	Jim	2006-0073	N/A	0
USA	25.09.89	Hugo	1989-0115	1989254N13340	10	yes
CAN	22.09.89	Hugo	1989-0115	1989254N13340	3	yes
CHN	19.09.89	Vera	1989-0118	N/A	11	yes
VIR	18.09.89	Hugo	1989-0115	1989254N13340	2	yes
ATG	17.09.89	Hugo	1989-0115	1989254N13340	5	yes
DMA	17.09.89	Hugo	1989-0115	1989254N13340	2	yes
DOM	17.09.89	Hugo	1989-0115	1989254N13340	0	yes
GLP	17.09.89	Hugo	1989-0115	1989254N13340	0	yes
MTQ	17.09.89	Hugo	1989-0115	1989254N13340	0	yes
MSR	17.09.89	Hugo	1989-0115	1989254N13340	2	yes
ANT	17.09.89	Hugo	1989-0115	1989254N13340	0	yes
PRI	17.09.89	Hugo	1989-0115	1989254N13340	2	yes
KNA	17.09.89	Hugo	1989-0115	1989254N13340	2	yes
TWN	11.09.89	Sarah	1989-0370	1989246N16159	2
JPN	10.09.89	Sarah	1989-0457	1989246N16159	11
PHL	07.09.89	Sarah (Openg)	1989-0129	1989246N16159	1
BMU	08.08.89	Dean	1989-0108	1989212N15318	2
BGD	05.04.06	0	2006-0737	N/A	0
BGD	08.04.06	0	2006-0738	N/A	0
USA	01.08.89	Chantal	1989-0453	1989212N23270	7
KOR	24.07.89	Judy	1989-0265	1989201N11145	1
VNM	24.07.89	Irving	1989-0104	1989199N05139	11
CHN	21.07.89	Hope	1989-0451	1989194N13149	15	yes
PHL	15.07.89	Gordon (Goring)	1989-0120	1989190N20160	14	yes
HKG	11.07.89	Gordon	1989-0285	1989190N20160	1
USA	25.06.89	Allison	1989-0447	1989176N27264	1
PHL	11.07.06	Bilis	2006-0362	N/A	0
CHN	26.05.89	Brenda	1989-0252	1989142N11114	13
IND	26.05.89	0	1989-0158	1989143N17090	1
VNM	25.05.89	Cecil	1989-0178	1989142N11114	1
HKG	16.05.89	Brenda	1989-0283	1989134N07138	1
PHL	15.05.89	Breda (Bining)	1989-0187	1989134N07138	1
AUS	01.04.89	Aivu	1989-0398	1989089S11158	15
USA	02.08.06	Ernesto	2006-0466	N/A	0
MUS	29.01.89	Firinga	1989-0031	1989024S11064	2	yes
REU	29.01.89	Firinga	1989-0030	1989024S11064	0	yes
COM	24.01.89	Kalafandji, Firinga	1989-0029	1989024S11064	0	yes
HKG	08.09.06	0	1906-0015	N/A	0
BGD	18.09.06	0	2006-0510	N/A	0
NCL	02.01.89	Delilah	1989-0559	1988364S17148	10
BGD	29.11.88	04B	1988-0518	1988327N06100	5
IND	29.11.88	04B	1988-0519	1988327N06100	2
USA	22.11.88	Keith	1988-0513	1988323N15286	2
VNM	06.11.88	0	1988-0503	N/A	15	yes
PHL	05.11.88	Skip (Yoning)	1988-0506	1988308N09140	0	yes
PHL	01.11.88	Tess (Welpring)	1988-0557	1988306N15130	13	yes
NIC	22.10.88	Joan	1988-0481	1988285N09318	3
HKG	21.10.88	Ruby	1988-0647	1988295N10138	0	yes
PAN	21.10.88	Joan	1988-0478	1988285N09318	3	yes
PHL	21.10.88	Ruby (Unsang)	1988-0480	1988295N10138	15	yes
BGD	19.10.88	0	1988-0474	1988291N15095	1
CRI	19.10.88	Joan	1988-0466	1988285N09318	2	yes
COL	17.10.88	Joan	1988-0468	1988285N09318	2	yes
HND	16.10.88	Joan	1988-0484	1988285N09318	2	yes
VNM	10.10.88	0	1988-0460	1988282N15118	1
VEN	01.10.88	Joan	1988-0479	1988285N09318	0	yes
IND	18.09.06	0	2006-0510	N/A	0
MEX	14.09.88	Gilbert	1988-0430	1988253N12306	0	yes
JAM	12.09.88	Gilbert	1988-0427	1988253N12306	1	yes
HTI	11.09.88	Gilbert	1988-0424	1988253N12306	1	yes
LCA	11.09.88	Gilbert	1988-0674	1988253N12306	0	yes
MEX	04.09.88	Debby	1988-0631	﻿1988245N20269	15	yes
CUB	01.09.88	Gilbert	1988-0705	1988253N12306	0	yes
CHN	08.08.88	Bill (nÂ°7)	1988-0370	1988218N21128	15
REU	25.02.07	GamÃ¨de	2007-0085	N/A	0
PHL	16.07.88	Warren (Huaning)	1988-0312	1988193N09149	8
PHL	30.05.88	Susan (Biring)	1988-0231	1988150N19119	1
ZWE	27.02.07	Favio	2007-0080	N/A	0
AUS	01.03.88	Charlie	1988-0658	﻿1988050S13155	3	yes
MOZ	01.03.88	Filao	1988-0102	1988055S10051	2
NZL	29.03.07	Becky	2007-0133	N/A	0
PHL	14.12.87	Phillis (Trining)	1987-0240	1987343N05154	8
PHL	23.11.87	Nina (Sisang)	1987-0212	1987320N03171	15	yes
FSM	21.11.87	Nina	1987-0590	1987320N03171	2	yes
VNM	18.11.87	Maury	1987-0200	1987311N10148	3
IND	14.11.87	0	1987-0280	1987312N09095	11
IND	02.11.87	0	1987-0206	1987303N06088	10
TWN	24.10.87	Lynn	1987-0198	1987288N13168	0	yes
PHL	21.10.87	Lynn (Pedang)	1987-0197	1987288N13168	5	yes
JPN	16.10.87	Kelly	1987-0193	1987282N12137	8
GUM	01.10.87	Lynn	1987-0285	1987288N13168	0	yes
BMU	25.09.87	Emily	1987-0164	1987263N10309	5	yes
DOM	22.09.87	Emily	1987-0161	1987263N10309	1	yes
VCT	21.09.87	Emily	1987-0160	1987263N10309	1	yes
CHN	11.09.87	Gerald	1987-0159	1987245N15133	5
LCA	01.09.87	Emily	1987-0536	1987263N10309	0	yes
PHL	13.08.87	Cart (Ising)	1987-0239	1987219N08155	0	yes
PHL	08.08.87	Betty (Herming)	1987-0146	N/A	0	yes
GLP	29.08.07	Dean	2007-0360	N/A	0
KOR	16.07.87	Thelma	1987-0130	1987188N10151	3
PHL	29.09.07	Lekima	2007-0463	N/A	0
PHL	29.09.07	Hanna	2007-0667	N/A	0
CHN	19.06.87	0	1987-0114	1987168N17118	1
CHN	02.10.07	Krosa	2007-0552	2007274N18131	0	yes
BGD	04.06.87	0	1987-0110	1987150N13095	2
PNG	12.11.07	Guba	2007-0557	2007317S11150	0
BGD	22.03.08	0	2008-0644	N/A	0
PHL	13.05.08	TYphoon "Rammasun" (Butchoy)	2008-0609	N/A	0
BLZ	31.05.08	Arthur	2008-0233	N/A	0
COK	02.01.87	Sally	1987-0048	1986360S13195	2
PHL	18.07.08	Typhoon "Helen"	2008-0621	N/A	0
FJI	28.12.86	Rajah	1986-0143	1986356S07183	5
WLF	25.12.86	Raja	1986-0142	1986356S07183	1
PHL	20.12.86	Narge (Aning)	1986-0153	1986343N05176	5
BGD	09.11.86	0	1986-0131	1986313N22089	1
PHL	17.10.86	Georgia (Ruping)	1986-0152	1986276N07177	2	yes
PHL	10.10.86	Ellen (Daling)	1986-0151	N/A	0	yes
VNM	05.11.08	Tropical Storm "Maysak" (Quinta-Sony)	2008-0540	2008311N08128	0
PHL	29.04.09	Typhhon "Dante" (Kujira)	2009-0174	2009121N13124	0
BTN	25.05.09	Cyclone "Aila"	2009-0204	2009143N17089	0	yes
TWN	19.09.86	Abby	1986-0115	1986252N06153	5
LCA	08.09.86	Danielle	1986-0112	1986250N11308	1
VNM	06.09.86	Wayne (NÂ°5)	1986-0109	1986228N19120	0	yes
PHL	02.09.86	Wayne (Miding)	1986-0104	1986228N19120	0	yes
PHL	18.07.09	Tropical Storm "Isang" (Molave)	2009-0265	2009196N14129	0
CHN	27.08.86	Vera	1986-0268	N/A	12	yes
IRL	25.08.86	Charlie	1986-0103	1986226N30276	3
TWN	22.08.86	Wayne	1986-0101	1986228N19120	2	yes
HKG	21.08.86	Wayne	1986-0200	1986228N19120	5	yes
JPN	04.08.86	Sarah	1986-0097	1986210N12141	8
CHN	21.07.86	0	1986-0082	1986200N17111	10
CHN	11.07.86	Peggy	1986-0081	1986179N11175	11	yes
HKG	09.07.86	Peggy	1986-0198	1986179N11175	11	yes
PHL	09.07.86	Peggy (Gading)	1986-0080	1986179N11175	11	yes
SLB	19.05.86	Namu	1986-0065	1986135S07160	1
PHL	04.08.09	Typhoon Morakot (Kiko)	2009-0321	2009215N20133	0	yes
MDG	15.03.86	Honorinina	1986-0042	1986067S11080	8
AUS	01.02.86	Winifred	1986-0029	1986027S13145	13
CUB	18.11.85	Hurricane "Kate"	1985-0134	1985320N21296	1
CHN	09.08.09	Typhoon Morakot (Kiko)	2009-0321	2009215N20133	0	yes
USA	27.10.85	Juan	1985-0126	1985299N25270	4
VNM	23.10.85	Cecil	1985-0114	1985281N02144	0	yes
PHL	02.09.09	Tropical storm Labuyo (Dujuan)	2009-0360	N/A	0
IND	10.10.85	0	1985-0121	1985282N12090	1
KOR	05.10.85	Brenda	1985-0118	1985268N03161	5
USA	27.09.85	Gloria	1985-0111	1985260N13336	6
HKG	06.09.85	Tess	1985-0222	1985240N08148	2
PHL	08.09.09	Tropical depression Maring	2009-0373	N/A	0
PHL	01.09.85	Tess (Miling)	1985-0192	1985240N08148	1
USA	30.08.85	Elena	1985-0104	1985240N20286	10
CHN	30.07.85	0	1985-0084	1985199N08143	8
PHL	20.06.85	Hal (Kuring) and Irma (Daling)	1985-0190	1985162N05154	1
PHL	12.09.09	Tropical Depression Nando	2009-0374	N/A	0
BGD	24.05.85	0	1985-0063	1985143N16088	1
FJI	17.03.85	0	1985-0044	1985070S17175	14
SLB	14.03.85	Hina	1985-0043	1985070S17175	1
FJI	05.03.85	Gavin	1985-0042	1985062S15170	1
COM	14.02.85	0	1985-0030	1985044S16042	1
MUS	29.01.85	Ditra	1985-0156	1985025S09073	1
FJI	17.01.85	Eric, Nigel, Odette	1985-0021	N/A	15	yes
BGD	15.10.09	0	1909-0010	N/A	0
HTI	12.11.09	0	1909-0012	N/A	0
PHL	25.11.09	Tropical depression "Urduja"	2009-0521	N/A	0
IND	30.11.84	0	1984-0228	1984332N08086	7
IND	14.11.84	0	1984-0110	1984314N09088	5
AIA	07.11.84	Klaus	1984-0200	1984311N15291	1
PHL	03.11.84	Agnes (Undang)	1984-0105	1984302N00149	13	yes
BGD	13.04.10	0	2010-0171	N/A	0
VNM	01.11.84	Agnes (nÂ°9)	1984-0103	1984302N00149	7
PHL	23.10.84	Warren (Reming)	1984-0186	N/A	1	yes
IND	13.10.84	0	1984-0227	1984285N17089	1
IND	13.04.10	0	2010-0171	N/A	0
BGD	17.04.10	0	2010-0205	N/A	0
HKG	21.07.10	Typhoon Chanthu	2010-0332	N/A	0
CPV	16.09.84	Fran	1984-0085	1984260N14339	1
CHN	09.09.84	Ike	1984-0082	N/A	0	yes
VNM	23.07.10	Typhoon Chanthu	2010-0332	N/A	0
PHL	01.09.84	Ike (Nitang) and Maring	1984-0185	N/A	15	yes
PHL	27.08.84	June (Maring)	1984-0073	N/A	10	yes
CHN	01.08.84	0	1984-0398	1984207N29135	8
PHL	09.08.10	Tropical storm Ester (Dianmu)	2010-0383	N/A	0
MDG	09.04.84	Kamisy	1984-0034	1984094S10080	2	yes
REU	01.04.84	Kamisy	1984-0150	1984094S10080	0	yes
JAM	29.09.10	Tropical storm Nicole	2010-0501	N/A	0
MOZ	28.01.84	Domoina	1984-0018	1984016S15073	2	yes
ZAF	28.01.84	Domoina, Imboa	1984-0019	1984016S15073	0	yes
SWZ	28.01.84	Domoina	1984-0017	1984016S15073	0	yes
PNG	02.02.11	Tropical Cyclone "Yasi"	2011-0070	2011028S13180	0	yes
MDG	10.12.83	0	1983-0157	1983339S10065	2
MUS	08.12.83	Andy	1983-0156	1983339S10065	1
CHN	04.06.11	Tropical storm "Dodong" (Sarika)	2011-0203	N/A	0
BGD	13.11.83	0	1983-0147	1983309N10091	2
MEX	20.10.83	Tico	1983-0134	1983285N09260	5
PHL	09.06.11	Tropical storm "Dodong" (Sarika)	2011-0203	N/A	0
PHL	21.06.11	Topical storm "Meari" (Falcon)	2011-0231	N/A	0
IND	03.10.83	0	1983-0129	1983274N18089	1
JPN	28.09.83	Forest	1983-0123	1983259N08161	5
HKG	09.09.83	Ellen	1983-0121	1983239N10183	3
PHL	02.08.11	Typhoon "Kabayan" (Muifa)	2011-0279	2011208N09145	0
PHL	03.09.83	Ellen (Herming)	1983-0219	1983239N10183	8
CHN	02.09.83	Ellen	1983-0485	1983239N10183	5
MTQ	03.08.11	Tropical storm "Emily"	2011-0303	N/A	0
USA	17.08.83	Alicia	1983-0110	1983228N27270	7
DOM	04.08.11	Tropical storm "Emily"	2011-0303	N/A	0
HTI	04.08.11	Tropical storm "Emily"	2011-0303	N/A	0
PYF	14.04.83	Veena	1983-0071	1983097S10224	5
PRI	04.08.11	Tropical storm "Emily"	2011-0303	N/A	0
FJI	25.03.83	Sarah	1983-0057	1983082S11180	4
DMA	25.09.11	Tropical storm Orphelia	2011-0432	N/A	0
PHL	01.10.11	Typhoon Quiel (Nalgae)	2011-0378	2011270N18139	0	yes
FJI	01.03.83	Oscar	1983-0047	1983054S15179	5
PYF	01.02.83	Orama	1983-0043	N/A	3	yes
COM	10.01.83	Elinah	1983-0038	1983010S08049	1
USA	22.06.12	Tropical storm Debby	2012-0176	2012176N26272	0
PHL	02.12.82	(Aning)	1982-0176	1982325N08176	3
USA	23.11.82	Iwa	1982-0124	1982324N10193	1
IND	09.11.82	0	1982-0120	1982309N11064	8
VNM	18.10.82	Nancy (NÂ°7)	1982-0112	1982283N17148	5
PHL	12.10.82	Nancy (Weling)	1982-0111	1982283N17148	7
KOR	30.08.12	Typhoon Tembin	2012-0585	2012230N21126	0	yes
PHL	13.09.12	Typhoon Karen	2012-0434	N/A	0
PHL	05.09.82	(Ruping)	1982-0101	1982248N14133	10
JPN	02.09.82	Judy	1982-0099	N/A	14	yes
PHL	21.09.12	Typhoon Lawin (Jelawat)	2012-0374	N/A	0
PHL	03.10.12	Tropical Storm Marce (Gaemi)	2012-0463	N/A	0
PHL	25.08.82	Faye	1982-0093	1982227N09140	11
JAM	18.11.12	0	1912-0011	N/A	0
KOR	14.08.82	Cecil	1982-0091	1982213N13145	3
JPN	02.08.82	Bess	1982-0090	1982202N11165	6
PHL	12.07.82	(Emang)	1982-0174	1982190N09148	1
CUB	03.06.82	Alberto	1982-0074	1982154N22273	1
IND	03.06.82	0	1982-0313	1982150N13087	1
SYC	07.02.13	Topical Depression Feleng	2013-0026	2013026S13067	0
PHL	20.02.13	Tropical depression Crising (Shanshan)	2013-0378	N/A	0
MMR	04.05.82	0	1982-0057	1982120N11083	1
LKA	13.05.13	Tropical cyclone Mahasen	2013-0138	2013130N04093	0
SLB	01.04.82	Bernie	1982-0044	1982091S03159	1
PHL	23.03.82	Nelson (Bising)	1982-0038	N/A	0	yes
PHL	22.03.82	Mamie	1982-0037	1982073N07153	15	yes
CHN	30.09.13	Typhoon Wutip	2013-0419	2013269N15118	0	yes
TON	03.03.82	Isaac	1982-0034	1982058S10185	1
IND	22.11.13	Helen	2013-0515	N/A	0	reject
REU	02.01.14	Cyclone Beisja	2014-0016	N/A	0
MUS	16.01.82	Damia	1982-0024	1982005S10105	3
PHL	19.01.14	Tropical Depression Agaton ( (Lingling)	2014-0020	N/A	0
PHL	25.12.81	Lee (Dinang)	1981-0112	1981355N07149	4
NCL	23.12.81	Gyan	1981-0111	1981353S09172	2
MDG	20.12.81	0	1981-0110	1981351S12060	1
GTM	30.05.14	Boris	2014-0183	N/A	0
BGD	11.12.81	0	1981-0108	1981339N11089	8
IND	10.12.81	0	1981-0107	1981339N11089	8
PHL	25.11.81	Irma (Anding)	1981-0101	1981319N07163	14	yes
MEX	30.05.14	Boris	2014-0183	N/A	0
MEX	07.10.81	St. Lidia	1981-0090	1981280N20250	10
JPN	10.08.14	Typhoon Halong	2014-0316	2014209N12152	0	yes
PHL	20.09.81	Clara	1981-0083	1981256N10150	2
AUS	22.02.15	Cyclone 'Marcia'	2015-0079	2015047S15152	0	yes
JPN	23.08.81	Thad	1981-0077	1981227N18129	8
CHN	09.07.15	Tropical cyclone Linfa (Egay)	2015-0278	2015183N13130	0	yes
PHL	05.08.15	Typhoon 'Soudelor' (Hanna)	2015-0339	2015211N13162	0	yes
JPN	06.08.81	Phyllis	1981-0072	N/A	9	yes
HTI	12.08.15	0	1915-0006	N/A	0
PHL	04.07.81	0	1981-0062	1981178N05160	15
PHL	28.06.81	(Daling)	1981-0134	1981176N08150	13
DMA	27.08.15	Hurricane Erika	2015-0375	N/A	0
NCL	05.03.81	Freda	1981-0037	1981056S14141	8
COK	21.02.81	Daman	1981-0032	1981051S14181	15
NCL	11.02.81	Cliff	1981-0030	1981039S09178	1
VUT	11.02.81	Cliff	1981-0029	1981039S09178	1
FJI	15.01.81	Arthur	1981-0024	1981011S12185	1
DOM	28.08.15	Hurricane Erika	2015-0375	N/A	0
HTI	29.08.15	Hurricane Erika	2015-0375	N/A	0
PHL	06.11.80	Betty (Aring)	1980-0099	1980296N05165	0	yes
IND	16.10.80	0	1980-0227	1980284N09092	2
THA	15.09.15	Cyclone Vamco	2015-0620	N/A	0
VNM	15.09.80	Ruth (NÂ°6)	1980-0090	1980254N14112	1
KHM	19.09.15	Cyclone Vamco	2015-0620	N/A	0
USA	09.08.80	Allen	1980-0080	1980214N11330	2	yes
HTI	05.08.80	Allen	1980-0078	1980214N11330	2	yes
MTQ	05.08.80	Allen	1980-0307	1980214N11330	0	yes
CUB	04.08.80	Allen	1980-0229	1980214N11330	1	yes
DMA	04.08.80	Allen	1980-0230	1980214N11330	1	yes
DOM	04.08.80	Allen	1980-0231	1980214N11330	1	yes
GRD	04.08.80	Allen	1980-0305	1980214N11330	1	yes
BRB	31.07.80	Allen	1980-0306	1980214N11330	1	yes
JAM	31.07.80	Allen	1980-0079	1980214N11330	1	yes
LCA	31.07.80	Allen	1980-0076	1980214N11330	1	yes
VCT	31.07.80	0	1980-0077	1980214N11330	1	yes
TON	07.04.16	Tropical cyclone Zena	2016-0141	N/A	0
CHN	24.07.80	Joe	1980-0069	1980197N07154	0	yes
VNM	23.07.80	Joe (nÂ°4)	1980-0068	1980197N07154	5	yes
PHL	21.07.80	Joe	1980-0067	1980197N07154	15	yes
MEX	06.08.16	Tropical storm Earl	2016-0284	2016215N16283	0
HKG	18.07.80	Joe	1980-0225	1980197N07154	0	yes
CHN	18.08.16	Tropical storm Dianmu	2016-0379	N/A	0
PHL	28.09.16	Typhoon Helen (Megi)	2016-0490	N/A	0
JPN	05.10.16	Typhoon Chaba (Chyba?)	2016-0361	2016269N15165	0	yes
IND	21.11.16	0	1916-0004	2016335N07088	0
ZWE	01.01.17	Tropical depression 'Ex-Dineo'	2017-0091	N/A	0
FJI	24.03.80	Wally	1980-0036	1980081S12170	1
PHL	20.03.80	(Biring)	1980-0132	1980076N06148	1
PHL	15.04.17	Tropical depression 02W (Crising)	2017-0142	N/A	0
AUS	01.02.80	Dean	1980-0287	N/A	13	yes
MEX	01.06.17	Beatriz	2017-0168	N/A	0
JAM	22.09.17	0	1917-0006	N/A	0
