# Supplementary material for: Regional tropical cyclone impact functions for globally consistent risk assessments
Source: Copernicus journal article supplement (doi:10.5194/nhess-21-393-2021), 2021-01-29
Supplement: Supplementary file 1 [file nhess-21-393-2021-supplement.zip › Table_S2_V_half_individual_fitting_per_event.csv]

EM_ID	ibtracsID	v_half_fitted [m/s]	country	country_id	region	year	Reported_Damage [USD]	reference_year	Normalized_Reported_Damage [USD]	Simulated_Damage [USD]	log_ratio	unique_ID
1980-0036	1980081S12170	39.2	FJI	242	OC	1980	2256000	2014	8410828.037	8395962.204	-0.001769027	1980-0036FJI
1980-0080	1980214N11330	106.8	USA	840	NA2	1980	860000000	2014	5264166323	5256769039	-0.001406203	1980-0080USA
1980-0099	1980296N05165	58.4	PHL	608	WP2	1980	102300000	2014	897149786.7	897162024.7	1.36E-05	1980-0099PHL
1980-0133	1980126N08150	70.1	PHL	608	WP2	1980	289000	2014	2534470.072	2539189.469	0.001860353	1980-0133PHL
1981-0083	1981256N10150	37.6	PHL	608	WP2	1981	6700000	2014	53489704.34	53126575	-0.006811919	1981-0083PHL
1981-0101	1981319N07163	86.5	PHL	608	WP2	1981	35000000	2014	279423828.6	279356846.9	-0.000239743	1981-0101PHL
1981-0110	1981351S12060	25.8	MDG	450	SI	1981	250000000	2014	742274546.2	139581097.2	-1.671073409	1981-0110MDG
1981-0111	1981353S09172	147.1	NCL	540	OC	1981	200000	2014	551603.3058	552274.4408	0.001215959	1981-0111NCL
1981-0112	1981355N07149	106.6	PHL	608	WP2	1981	26000000	2014	207571987	207434161.8	-0.000664208	1981-0112PHL
1981-0134	1981176N08150	37.1	PHL	608	WP2	1981	7609000	2014	60746740.34	60552182.26	-0.003207914	1981-0134PHL
1981-0138	1981317N14153	325.7	PHL	608	WP2	1981	167000	2014	1333250.839	4690972.593	1.258019737	1981-0138PHL
1982-0034	1982058S10185	78.8	TON	776	OC	1982	21200000	2014	151622251.2	151685209.3	0.000415144	1982-0034TON
1982-0090	1982202N11165	169.7	JPN	392	WP4	1982	137000000	2014	585717153.3	585156603.8	-0.000957489	1982-0090JPN
1982-0093	1982227N09140	136.2	PHL	608	WP2	1982	6500000	2014	49805902.91	49825948.18	0.000402387	1982-0093PHL
1982-0105	1982262N12270	82.7	MEX	484	NA1	1982	82400000	2014	586753507.8	587911847.3	0.001972204	1982-0105MEX
1982-0120	1982309N11064	53	IND	356	NI	1982	625420000	2014	6353835704	6333077626	-0.003272363	1982-0120IND
1982-0124	1982324N10193	25.8	USA	840	NA2	1982	230000000	2014	1204787041	139213192.7	-2.158051582	1982-0124USA
1982-0174	1982190N09148	53	PHL	608	WP2	1982	4500000	2014	34481009.7	34508564.46	0.000798809	1982-0174PHL
1982-0176	1982325N08176	325.7	PHL	608	WP2	1982	5000	2014	38312.233	109565.7082	1.0507552	1982-0176PHL
1982-0255	1982095S11138	25.8	AUS	36	OC	1982	6864000	2014	51906694.26	24595091.36	-0.746900881	1982-0255AUS
1982-0313	1982150N13087	40.7	IND	356	NI	1982	120000000	2014	1219117208	1213968600	-0.00423217	1982-0313IND
1983-0047	1983054S15179	59.9	FJI	242	OC	1983	50000000	2014	199598757.6	200079843.9	0.002407367	1983-0047FJI
1983-0057	1983082S11180	25.8	FJI	242	OC	1983	851000	2014	3397170.854	3043079.372	-0.110073029	1983-0057FJI
1983-0071	1983097S10224	80.2	PYF	258	OC	1983	21000000	2014	54194671.27	54184495.54	-0.00018778	1983-0071PYF
1983-0110	1983228N27270	113.5	USA	840	NA2	1983	3000000000	2014	14448395154	14460245256	0.000819831	1983-0110USA
1983-0121	1983239N10183	247.1	HKG	344	WP4	1983	12544000	2014	122247467.4	122276578.6	0.000238105	1983-0121HKG
1983-0129	1983274N18089	33.8	IND	356	NI	1983	510000000	2014	4764703292	4789699613	0.005232431	1983-0129IND
1983-0157	1983339S10065	34.9	MDG	450	SI	1983	25000000	2014	75988123.11	76350597.6	0.004758805	1983-0157MDG
1984-0034	1984094S10080	25.8	MDG	450	SI	1984	250000000	2014	907770830.7	395535661.3	-0.830751007	1984-0034MDG
1984-0105	1984302N00149	54.4	PHL	608	WP2	1984	96600000	2014	875268514.8	874308890	-0.001096979	1984-0105PHL
1984-0110	1984314N09088	153.5	IND	356	NI	1984	35000000	2014	336397308.3	336760286.3	0.001078434	1984-0110IND
1985-0044	1985070S17175	99.3	FJI	242	OC	1985	3000000	2014	11785953.11	11773200.93	-0.001082567	1985-0044FJI
1985-0063	1985143N16088	73.8	BGD	50	NI	1985	50000000	2014	388010978.9	387689559.2	-0.000828721	1985-0063BGD
1985-0104	1985240N20286	91.5	USA	840	NA2	1985	1100000000	2014	4434115752	4434804314	0.000155275	1985-0104USA
1985-0111	1985260N13336	165	USA	840	NA2	1985	900000000	2014	3627912888	3625496587	-0.000666253	1985-0111USA
1985-0118	1985268N03161	37.7	KOR	410	WP4	1985	14000000	2014	197048615.5	198029017.5	0.004963096	1985-0118KOR
1985-0126	1985299N25270	72.9	USA	840	NA2	1985	1500000000	2014	6046521480	6044937215	-0.000262047	1985-0126USA
1985-0190	1985162N05154	31.9	PHL	608	WP2	1985	20000000	2014	185189963.4	183141092.2	-0.011125276	1985-0190PHL
1986-0029	1986027S13145	45.1	AUS	36	OC	1986	70000000	2014	563514152.7	565444119.6	0.003419026	1986-0029AUS
1986-0042	1986067S11080	53.3	MDG	450	SI	1986	150000000	2014	491370641.1	493215306.8	0.003747094	1986-0042MDG
1986-0065	1986135S07160	37.5	SLB	90	OC	1986	20000000	2014	111253691.9	110450052.8	-0.007249698	1986-0065SLB
1986-0081	1986179N11175	48.1	CHN	156	WP3	1986	380000000	2014	13244203233	13188900322	-0.004184374	1986-0081CHN
1986-0115	1986252N06153	290.1	TWN	158	WP4	1986	80000000	2014	542490477.3	542431362.6	-0.000108975	1986-0115TWN
1986-0143	1986356S07183	25.8	FJI	242	OC	1986	20000000	2014	69498014.25	13482626.58	-1.639896243	1986-0143FJI
1986-0152	1986276N07177	34.1	PHL	608	WP2	1986	36000000	2014	343006780.4	344811815.2	0.00524859	1986-0152PHL
1986-0153	1986343N05176	272.6	PHL	608	WP2	1986	4000000	2014	38111864.49	38099421.55	-0.000326538	1986-0153PHL
1987-0057	1987035S12160	48.9	VUT	548	OC	1987	25000000	2014	155722786.8	155650596.3	-0.000463691	1987-0057VUT
1987-0130	1987188N10151	99.5	KOR	410	WP4	1987	325000000	2014	3138801397	3134047295	-0.001515772	1987-0130KOR
1987-0159	1987245N15133	40.7	CHN	156	WP3	1987	120000000	2014	4608092264	4627134752	0.004123887	1987-0159CHN
1987-0164	1987263N10309	59.4	BMU	60	NA1	1987	50000000	2014	214952184.2	214688521.6	-0.001227363	1987-0164BMU
1987-0212	1987320N03171	170	PHL	608	WP2	1987	56000000	2014	480080890.5	479688254.9	-0.000818188	1987-0212PHL
1987-0239	1987219N08155	105.5	PHL	608	WP2	1987	5600000	2014	48008089.05	47999808.52	-0.000172497	1987-0239PHL
1987-0240	1987343N05154	82	PHL	608	WP2	1987	8500000	2014	72869420.88	72908124.38	0.000530994	1987-0240PHL
1988-0312	1988193N09149	35.6	PHL	608	WP2	1988	11516000	2014	86504877.06	86385597.87	-0.001379824	1988-0312PHL
1988-0430	1988253N12306	168.4	MEX	484	NA1	1988	76000000	2014	550112928	550213379.9	0.000182586	1988-0430MEX
1988-0481	1988285N09318	36.5	NIC	558	NA1	1988	400000000	2014	1806289799	1817479172	0.006175564	1988-0481NIC
1988-0506	1988308N09140	42.9	PHL	608	WP2	1988	149060000	2014	1119695812	1120889297	0.001065333	1988-0506PHL
1988-0557	1988306N15130	31.9	PHL	608	WP2	1988	940000	2014	7061009.416	7131612.632	0.009949366	1988-0557PHL
1989-0115	1989254N13340	49.3	ATG	28	NA1	1989	80000000	2014	232560060.9	233463359.6	0.003876629	1989-0115ATG
1989-0115	1989254N13340	40.7	DMA	212	NA1	1989	20000000	2014	56557045.94	56990741.94	0.007639041	1989-0115DMA
1989-0115	1989254N13340	48.1	KNA	659	NA1	1989	46000000	2014	219073474.2	218799713.4	-0.001250411	1989-0115KNA
1989-0115	1989254N13340	25.8	MSR	500	NA1	1989	240000000	2014	240000000	54629110.58	-1.480072022	1989-0115MSR
1989-0115	1989254N13340	116.4	USA	840	NA2	1989	7000000000	2014	21678841358	21687159989	0.000383648	1989-0115USA
1989-0115	1989254N13340	159.9	VIR	850	NA1	1989	21800000	2014	58754072.56	58790887.87	0.000626404	1989-0115VIR
1989-0120	1989190N20160	81	PHL	608	WP2	1989	61000000	2014	407741184.1	407187405.7	-0.001359085	1989-0120PHL
1989-0125	1989279N07151	249.3	PHL	608	WP2	1989	59200000	2014	395709477	395579902.7	-0.000327502	1989-0125PHL
1989-0126	1989286N14137	87.6	PHL	608	WP2	1989	35400000	2014	236623572.4	236735425.6	0.000472593	1989-0126PHL
1989-0132	1989314N10152	298.7	PHL	608	WP2	1989	325000	2014	2172391.554	2172693.594	0.000139026	1989-0132PHL
1989-0265	1989201N11145	50.1	KOR	410	WP4	1989	176500000	2014	1022890325	1028251601	0.005227613	1989-0265KOR
1989-0398	1989089S11158	71.5	AUS	36	OC	1989	94300000	2014	461534104.7	461070798.7	-0.001004343	1989-0398AUS
1990-0019	1990124N09088	74.1	IND	356	NI	1990	580000000	2014	3684645392	3694898103	0.002778686	1990-0019IND
1990-0037	1990166N06141	41.6	CHN	156	WP3	1990	16000000	2014	464775602.6	466700655	0.004133342	1990-0037CHN
1990-0038	1990171N11148	106.6	CHN	156	WP3	1990	28000000	2014	813357304.5	812769447.7	-0.000723015	1990-0038CHN
1990-0121	1990327S07175	130.3	FJI	242	OC	1990	10000000	2014	33532784.13	33571889.31	0.001165498	1990-0121FJI
1990-0390	1990202N13130	57	CHN	156	WP3	1990	83000000	2014	2411023438	2403268533	-0.003221621	1990-0390CHN
1990-0393	1990216N13281	59.6	MEX	484	NA1	1990	90700000	2014	456380159.7	457720406.3	0.002932385	1990-0393MEX
1990-0402	1990235N10152	85	CHN	156	WP3	1990	688000000	2014	19985350911	20029007455	0.002182045	1990-0402CHN
1990-0405	1990245N16149	103.6	CHN	156	WP3	1990	154000000	2014	4473465175	4474420771	0.000213591	1990-0405CHN
1990-0407	1990251N06171	178.1	JPN	392	WP4	1990	4000000000	2014	6193036523	6196291658	0.000525474	1990-0407JPN
1990-0422	1990350S11165	43.2	AUS	36	OC	1990	155600000	2014	733330742.5	736672274.3	0.0045463	1990-0422AUS
1991-0120	1991113N10091	65.3	BGD	50	NI	1991	1780000000	2014	9940604678	9948189982	0.000762772	1991-0120BGD
1991-0218	1991228N26286	91	USA	840	NA2	1991	1500000000	2014	4256954560	4261266006	0.001012288	1991-0218USA
1991-0364	1991338S08181	42.6	WSM	882	OC	1991	278000000	2014	1782167001	1782019359	-8.28E-05	1991-0364WSM
1991-0382	1991289N06156	54.8	PHL	608	WP2	1991	90000000	2014	563936202.8	562823931.5	-0.001974283	1991-0382PHL
1991-0526	1991200N05157	66.3	JPN	392	WP4	1991	81500000	2014	110285260.8	110330966.9	0.00041435	1991-0526JPN
1991-0539	1991256N13171	131	JPN	392	WP4	1991	10000000000	2014	13531933846	13532696955	5.64E-05	1991-0539JPN
1991-0710	1991220N10133	34.1	THA	764	WP1	1991	8323000	2014	34512098.63	34986428.57	0.013650284	1991-0710THA
1992-0061	1992174N13126	172.1	VNM	704	WP1	1992	400000	2014	7548589.73	7552262.137	0.000486384	1992-0061VNM
1992-0066	1992230N11325	95.4	USA	840	NA2	1992	26500000000	2014	71005515347	71121951504	0.001638475	1992-0066USA
1992-0143	1992289N08135	46.2	VNM	704	WP1	1992	18000000	2014	339686537.9	340038182.3	0.001034667	1992-0143VNM
1992-0162	1992338S04173	260.2	FJI	242	OC	1992	1600000	2014	4683021.159	4685294.259	0.000485274	1992-0162FJI
1992-0271	1992249N12229	25.8	USA	840	NA2	1992	5000000000	2014	13397267047	139213200.5	-4.566799439	1992-0271USA
1992-0342	1992233N16254	44.8	MEX	484	NA1	1992	3000000	2014	10859450.34	10821712.85	-0.003481135	1992-0342MEX
1992-0357	1992237N14144	42.4	TWN	158	WP4	1992	35000000	2014	83218785.15	83608159.72	0.004668014	1992-0357TWN
1992-0463	1992194N07140	95.7	HKG	344	WP4	1992	219700000	2014	614100138.3	614469716.1	0.000601639	1992-0463HKG
1993-0016	1993131S04158	41.5	PNG	598	OC	1993	1500000	2014	6953406.58	6945308.68	-0.001165273	1993-0016PNG
1993-0024	1993083S12181	120.7	VUT	548	OC	1993	6000000	2014	25998065.23	26020847.91	0.000875938	1993-0024VUT
1993-0077	1993271N14134	53.6	PHL	608	WP2	1993	188000000	2014	984067975.5	980564341.4	-0.003566711	1993-0077PHL
1993-0079	1993246N16129	33	JPN	392	WP4	1993	1300000000	2014	1415656470	1419557298	0.002751701	1993-0079JPN
1993-0085	1993331N07108	88.3	IND	356	NI	1993	100000000	2014	730095393.3	729136239.4	-0.001314602	1993-0085IND
1993-0088	1993322N09137	44.8	PHL	608	WP2	1993	2000000	2014	10468808.25	10463170.82	-0.000538643	1993-0088PHL
1993-0088	1993322N09137	81	VNM	704	WP1	1993	15000000	2014	211901951.8	212217305.1	0.001487098	1993-0088VNM
1993-0199	1993224N07153	64.4	CHN	156	WP3	1993	433920000	2014	10227548827	10229454530	0.000186313	1993-0199CHN
1993-0228	1993353N05159	169.8	PHL	608	WP2	1993	17000000	2014	88984870.12	89019101.11	0.000384609	1993-0228PHL
1993-0464	1993253N06150	65.7	CHN	156	WP3	1993	263670000	2014	6214734972	6193264638	-0.003460728	1993-0464CHN
1993-0466	1993298N11154	36.4	CHN	156	WP3	1993	15890000	2014	374529293.1	378991865.8	0.011844724	1993-0466CHN
1993-0473	1993211N07161	240.6	JPN	392	WP4	1993	450000000	2014	490034931.9	490304476.1	0.0005499	1993-0473JPN
1994-0009	1994007S16056	47	MDG	450	SI	1994	10000000	2014	35852773.5	36011276.82	0.004411206	1994-0009MDG
1994-0044	1994117N07096	49.6	BGD	50	NI	1994	125000000	2014	639962654.8	641125319.8	0.001815122	1994-0044BGD
1994-0071	1994197N14115	39	PHL	608	WP2	1994	37600000	2014	166973054.6	167152538	0.001074347	1994-0071PHL
1994-0138	1994153N19113	161	CHN	156	WP3	1994	700000	2014	13002551.31	13003207.86	5.05E-05	1994-0138CHN
1994-0163	1994186N09139	133.9	CHN	156	WP3	1994	96300000	2014	1788779559	1788690280	-4.99E-05	1994-0163CHN
1994-0185	1994211N12152	244.7	TWN	158	WP4	1994	232000000	2014	479958040.5	479778510	-0.000374125	1994-0185TWN
1994-0198	1994224N20152	88.2	CHN	156	WP3	1994	1150000000	2014	21361334294	21319044816	-0.001981683	1994-0198CHN
1994-0198	1994224N20152	208.4	JPN	392	WP4	1994	6000000	2014	5930761.695	5934549.688	0.000638499	1994-0198JPN
1994-0352	1994302N11086	82.5	IND	356	NI	1994	19100000	2014	119004702	119187618.6	0.001535874	1994-0352IND
1994-0519	1994287N14156	259.2	PHL	608	WP2	1994	67400000	2014	299308082	299123832.2	-0.000615775	1994-0519PHL
1994-0594	1994345N06165	83.2	PHL	608	WP2	1994	26813000	2014	119070439.2	118906801	-0.001375242	1994-0594PHL
1995-0183	1995229N12144	70	KOR	410	WP4	1995	425000000	2014	1078553430	1077763418	-0.000732742	1995-0183KOR
1995-0188	1995236N10134	287.4	CHN	156	WP3	1995	87000000	2014	1241534250	1241256622	-0.000223641	1995-0188CHN
1995-0192	1995240N11337	42.7	ATG	28	NA1	1995	350000000	2014	773370483.3	771570241.2	-0.002330501	1995-0192ATG
1995-0192	1995240N11337	160.3	CAN	124	NA2	1995	100000000	2014	297876572.4	298136149.1	0.000871044	1995-0192CAN
1995-0192	1995240N11337	31.6	MSR	500	NA1	1995	20000000	2014	20000000	19952696.78	-0.002367962	1995-0192MSR
1995-0207	1995256N15253	36.5	MEX	484	NA1	1995	800000000	2014	2920653641	2926031587	0.001839657	1995-0207MEX
1995-0256	1995281N14278	28.9	MEX	484	NA1	1995	1500000000	2014	5476225576	5430128348	-0.00845333	1995-0256MEX
1995-0271	1995293N05177	325.7	PHL	608	WP2	1995	244000000	2014	936840738.5	1835824659	0.672735767	1995-0271PHL
1995-0274	1995294N05163	76.2	VNM	704	WP1	1995	21200000	2014	190369759.5	190451480.4	0.000429182	1995-0274VNM
1995-0275	1995310N09096	99.2	IND	356	NI	1995	46300000	2014	262049202.8	261827908.5	-0.000844833	1995-0275IND
1995-0393	1995193N06156	219.9	KOR	410	WP4	1995	140000000	2014	355288188.6	355117111.7	-0.000481632	1995-0393KOR
1995-0404	1995212N22287	66	BHS	44	NA1	1995	400000	2014	1278191.893	1280623.407	0.0019005	1995-0404BHS
1995-0404	1995212N22287	148.4	USA	840	NA2	1995	700000000	2014	1600355804	1601774396	0.000886031	1995-0404USA
1996-0052	1996001S08075	41.3	MOZ	508	SI	1996	14500000	2014	69792056.75	69531437.3	-0.003741218	1996-0052MOZ
1996-0110	1996202N17115	70.5	VNM	704	WP1	1996	362000000	2014	2733698258	2738388826	0.001714362	1996-0110VNM
1996-0168	1996203N12152	170.4	CHN	156	WP3	1996	72000000	2014	873787160.8	873155109.9	-0.000723608	1996-0168CHN
1996-0168	1996203N12152	262.2	TWN	158	WP4	1996	1100000000	2014	1993824461	1994825292	0.000501839	1996-0168TWN
1996-0201	1996248N15319	220.7	CAN	124	NA2	1996	100000	2014	286258.6963	286432.7091	0.000607702	1996-0201CAN
1996-0201	1996248N15319	60.8	PRI	630	NA1	1996	500000000	2014	1129729966	1126838603	-0.002562621	1996-0201PRI
1996-0227	1996260N19107	56.5	VNM	704	WP1	1996	11000000	2014	83068179.11	83458244.78	0.004684739	1996-0227VNM
1996-0256	1996306N15097	79.8	IND	356	NI	1996	1500300000	2014	7786525250	7792066042	0.000711334	1996-0256IND
1996-0282	1996356N08110	52.7	MYS	458	WP1	1996	52000000	2014	174301945.6	173673801.6	-0.003610279	1996-0282MYS
1996-0318	1996095S09133	46.7	AUS	36	OC	1996	46700000	2014	170904206.6	171420114	0.003014146	1996-0318AUS
1996-0325	1996187N10326	152.9	VGB	92	NA1	1996	2000000	2014	2000000	2002311.64	0.001155153	1996-0325VGB
1996-0371	1996201N07137	320.7	TWN	158	WP4	1996	200000000	2014	362513538.4	362428033.8	-0.000235894	1996-0371TWN
1997-0013	1997018S11059	33.9	MDG	450	SI	1997	50000000	2014	150510277.2	150241893.5	-0.00178475	1997-0013MDG
1997-0039	1997061S08171	119.8	FJI	242	OC	1997	27000000	2014	57809242.36	57890816.16	0.001410091	1997-0039FJI
1997-0168	1997210N15120	105.6	CHN	156	WP3	1997	579700000	2014	6319265945	6307948843	-0.001792494	1997-0168CHN
1997-0180	1997217N06168	30.6	JPN	392	WP4	1997	100000000	2014	109868789.5	111620909	0.015821558	1997-0180JPN
1997-0243	1997279N12263	66.7	MEX	484	NA1	1997	447800000	2014	1176350687	1176239750	-9.43E-05	1997-0243MEX
1997-0267	1997298N06140	77.2	KHM	116	WP1	1997	10000	2014	48505.97055	48568.14687	0.001281007	1997-0267KHM
1997-0267	1997298N06140	60.1	THA	764	WP1	1997	5000000	2014	13561680.42	13576851.17	0.001118023	1997-0267THA
1997-0267	1997298N06140	34.2	VNM	704	WP1	1997	470000000	2014	3260213213	3244977455	-0.004684193	1997-0267VNM
1997-0292	1997333N06194	135	GUM	316	OC	1997	200000000	2014	327208271.8	327242287	0.00010395	1997-0292GUM
1997-0358	1997261N13114	163.8	VNM	704	WP1	1997	5000000	2014	34683119.29	34661012.7	-0.000637591	1997-0358VNM
1998-0183	1998152N11075	66.1	IND	356	NI	1998	469000000	2014	2269722074	2272414630	0.00118559	1998-0183IND
1998-0297	1998259N17118	253.5	JPN	392	WP4	1998	3000000000	2014	3608482427	3607032520	-0.000401886	1998-0297JPN
1998-0311	1998281N11151	325.7	JPN	392	WP4	1998	335500000	2014	403548618.1	484163602.1	0.182125899	1998-0311JPN
1998-0374	1998315N09116	35.3	VNM	704	WP1	1998	93200000	2014	637799612.8	631449353.4	-0.010006409	1998-0374VNM
1998-0434	1998342N06141	66.3	VNM	704	WP1	1998	15000000	2014	102650152.3	102751784.9	0.000989597	1998-0434VNM
1999-0051	1999040S15147	64.6	AUS	36	OC	1999	300000000	2014	1131545100	1133239313	0.001496137	1999-0051AUS
1999-0177	1999135N12073	39.4	IND	356	NI	1999	20000000	2014	88885643.29	88908892.65	0.000261531	1999-0177IND
1999-0298	1999231N20266	127.1	USA	840	NA2	1999	70000000	2014	126960980	127028871.6	0.000534601	1999-0298USA
1999-0301	1999241N12133	46.1	CHN	156	WP3	1999	277900000	2014	2662759128	2670524860	0.002912178	1999-0301CHN
1999-0326	1999260N20130	160.7	JPN	392	WP4	1999	5000000000	2014	5316012420	5316956886	0.000177649	1999-0326JPN
1999-0327	1999251N15314	44.8	BHS	44	NA1	1999	450000000	2014	641705937.2	644161991	0.003820076	1999-0327BHS
1999-0327	1999251N15314	84.5	USA	840	NA2	1999	7000000000	2014	12696097995	12675805856	-0.001599576	1999-0327USA
1999-0392	1999275N16135	130.6	CHN	156	WP3	1999	241600000	2014	2314942804	2315198049	0.000110254	1999-0392CHN
1999-0401	1999288N15093	75.1	IND	356	NI	1999	470000000	2014	2088812617	2089705857	0.000427539	1999-0401IND
1999-0425	1999298N12099	82	IND	356	NI	1999	2500000000	2014	11110705411	11095873337	-0.001335827	1999-0425IND
1999-0435	1999286N16278	232.4	USA	840	NA2	1999	100000000	2014	181372828.5	181473486.7	0.000554826	1999-0435USA
1999-0619	1999236N22292	58.6	USA	840	NA2	1999	62500000	2014	113358017.8	113439034	0.000714438	1999-0619USA
1999-0625	1999230N12129	325.7	CHN	156	WP3	1999	18000000	2014	172470904.3	271662597.9	0.454332296	1999-0625CHN
2000-0097	2000056S17152	58.6	AUS	36	OC	2000	90000000	2014	317674987.2	317152965	-0.00164461	2000-0097AUS
2000-0107	2000032S11116	128.8	MDG	450	SI	2000	9000000	2014	24773011.21	24779586.39	0.000265382	2000-0107MDG
2000-0107	2000032S11116	95.7	MOZ	508	SI	2000	1000000	2014	3381086.779	3377433.308	-0.001081145	2000-0107MOZ
2000-0533	2000230N08139	325.7	CHN	156	WP3	2000	69443000	2014	600923967.1	602737067.3	0.003012645	2000-0533CHN
2000-0582	2000248N17117	45.6	VNM	704	WP1	2000	21000000	2014	125440545.4	125979702.1	0.004288895	2000-0582VNM
2000-0601	2000245N14157	319.4	KOR	410	WP4	2000	71000000	2014	178416664.1	178430679.8	7.86E-05	2000-0601KOR
2000-0706	2000299N08139	325.7	PHL	608	WP2	2000	17000000	2014	59708228.94	109753702.6	0.608768939	2000-0706PHL
2000-0706	2000299N08139	113.3	TWN	158	WP4	2000	150000000	2014	240119400	240329121.2	0.000873023	2000-0706TWN
2000-0715	2000305N06136	325.7	PHL	608	WP2	2000	31000000	2014	108879711.6	305722179.5	1.03243307	2000-0715PHL
2001-0293	2001170N11138	176.5	TWN	158	WP4	2001	5000000	2014	8829496.508	8836227.942	0.00076209	2001-0293TWN
2001-0319	2001181N08141	30.6	PHL	608	WP2	2001	68565000	2014	255861625.3	255364774	-0.001943763	2001-0319PHL
2001-0405	2001206N14134	76.5	CHN	156	WP3	2001	40000000	2014	313047801	312341037.7	-0.002260237	2001-0405CHN
2001-0405	2001206N14134	280.3	TWN	158	WP4	2001	240000000	2014	423815832.4	423746134.4	-0.000164467	2001-0405TWN
2001-0436	2001220N17118	33.6	VNM	704	WP1	2001	3200000	2014	18230113.7	18402804.93	0.009428269	2001-0436VNM
2001-0454	2001225N18146	36.4	JPN	392	WP4	2001	800000000	2014	901659328.8	894181173.4	-0.008328355	2001-0454JPN
2001-0522	2001248N23125	158.9	TWN	158	WP4	2001	800000000	2014	1412719441	1414013028	0.000915253	2001-0522TWN
2001-0553	2001278N12302	33.9	BLZ	84	NA1	2001	250000000	2014	485443358.1	487784713.7	0.004811534	2001-0553BLZ
2001-0624	2001309N10130	59	VNM	704	WP1	2001	55000000	2014	313330079.3	313747726	0.001332041	2001-0624VNM
2001-0671	2001303N13276	42.4	BHS	44	NA1	2001	300000000	2014	395198026.4	396338899.1	0.002882679	2001-0671BHS
2001-0711	2001363S10185	25.8	TON	776	OC	2001	51300000	2014	125645747.8	61874934.24	-0.708351264	2001-0711TON
2002-0004	2001364S19036	31.1	MDG	450	SI	2001	181000	2014	439343.7929	445737.8301	0.01444872	2002-0004MDG
2002-0669	2002295N11261	83.5	MEX	484	NA1	2002	200000000	2014	340513691.7	340009362.8	-0.001482181	2002-0669MEX
2002-0724	2002265N10315	94.9	USA	840	NA2	2002	2000000000	2014	3192297819	3187821874	-0.001403091	2002-0724USA
2003-0024	2003011S09182	25.8	FJI	242	OC	2003	30000000	2014	58076952.28	51280394.8	-0.124460383	2003-0024FJI
2003-0135	2003061S21148	149.3	NCL	540	OC	2003	40000000	2014	40000000	39967857.79	-0.000803878	2003-0135NCL
2003-0258	2003144N16119	40.7	PHL	608	WP2	2003	4000000	2014	13566469.09	13653992.95	0.006430762	2003-0258PHL
2003-0346	2003196N04150	132.7	CHN	156	WP3	2003	100000000	2014	631358675.5	631561257.7	0.000320816	2003-0346CHN
2003-0346	2003196N04150	116.9	PHL	608	WP2	2003	26468000	2014	89769325.95	89688671.83	-0.000898864	2003-0346PHL
2003-0443	2003240N20139	263.5	CHN	156	WP3	2003	241000000	2014	1521574408	1521111541	-0.000304249	2003-0443CHN
2003-0448	2003240N15329	109.6	BMU	60	NA1	2003	300000000	2014	399403562.6	399828430.3	0.00106319	2003-0448BMU
2003-0459	2003247N10153	100.4	JPN	392	WP4	2003	50000000	2014	54552255.91	54509967.04	-0.0007755	2003-0459JPN
2003-0459	2003247N10153	120.4	KOR	410	WP4	2003	4500000000	2014	9332563202	9339286292	0.000720131	2003-0459KOR
2003-0468	2003249N14329	92.8	USA	840	NA2	2003	3370000000	2014	5129874055	5119547369	-0.002015078	2003-0468USA
2003-0474	2003262N17254	57.8	MEX	484	NA1	2003	100000000	2014	180241122.2	179863368.4	-0.002098024	2003-0474MEX
2003-0487	2003268N28298	100.4	CAN	124	NA2	2003	110000000	2014	221788181.9	221623043	-0.000744857	2003-0487CAN
2003-0594	2003316N11141	53.1	CHN	156	WP3	2003	196938000	2014	1243385148	1243934556	0.000441767	2003-0594CHN
2003-0605	2003345N05092	72.9	IND	356	NI	2003	28000000	2014	93953651.91	93927917.74	-0.00027394	2003-0605IND
2003-0782	2003179N20271	94.1	USA	840	NA2	2003	50000000	2014	76110891.03	75976612.4	-0.001765808	2003-0782USA
2004-0103	2004061S12072	25.8	MDG	450	SI	2004	250000000	2014	611461783.3	349891343	-0.558229799	2004-0103MDG
2004-0153	2004098S15173	34.6	FJI	242	OC	2004	4000000	2014	6575111.983	6477235.422	-0.014997823	2004-0153FJI
2004-0218	2004134N07132	150.2	PHL	608	WP2	2004	1000000	2014	3114596.181	3112259.337	-0.00075057	2004-0218PHL
2004-0235	2004136N15090	44.3	MMR	104	NI	2004	688000	2014	4260951.721	4238654.264	-0.005246716	2004-0235MMR
2004-0309	2004174N14146	25.8	PHL	608	WP2	2004	19667000	2014	61254763.09	13802716.32	-1.490176204	2004-0309PHL
2004-0415	2004223N11301	104.1	CUB	192	NA1	2004	1000000000	2014	2111247808	2114143610	0.001370667	2004-0415CUB
2004-0415	2004223N11301	38.4	JAM	388	NA1	2004	300000000	2014	409384949.8	407910850.2	-0.003607265	2004-0415JAM
2004-0415	2004223N11301	112	USA	840	NA2	2004	16000000000	2014	22839070991	22861215281	0.00096911	2004-0415USA
2004-0428	2004227N15141	25.8	JPN	392	WP4	2004	500000000	2014	503661847.5	177221668.9	-1.04450379	2004-0428JPN
2004-0428	2004227N15141	134	KOR	410	WP4	2004	1000000	2014	1845168.832	1847692.412	0.001366735	2004-0428KOR
2004-0445	2004230N09172	153.1	GUM	316	OC	2004	1000000	2014	1435830.957	1437478.07	0.001146492	2004-0445GUM
2004-0448	2004241N32282	72.2	USA	840	NA2	2004	62500000	2014	89215121.06	89339480.31	0.001392955	2004-0448USA
2004-0455	2004238N11325	40.8	BHS	44	NA1	2004	1000000000	2014	1210044074	1218435858	0.006911168	2004-0455BHS
2004-0455	2004238N11325	82.9	USA	840	NA2	2004	11000000000	2014	15701861306	15696443197	-0.000345121	2004-0455USA
2004-0462	2004247N10332	75.4	TTO	780	NA1	2004	1000000	2014	2048171.488	2049992.563	0.000888727	2004-0462TTO
2004-0580	2004319N10134	142.4	PHL	608	WP2	2004	6000000	2014	18687577.08	18669893.72	-0.000946711	2004-0580PHL
2004-0580	2004319N10134	34.9	VNM	704	WP1	2004	23000000	2014	94274912.3	94402049.38	0.00134767	2004-0580VNM
2005-0351	2005186N12299	81	CUB	192	NA1	2005	1400000000	2014	2647941893	2645035134	-0.001098346	2005-0351CUB
2005-0351	2005186N12299	97.5	JAM	388	NA1	2005	30000000	2014	37089462.6	37061160.28	-0.000763374	2005-0351JAM
2005-0351	2005186N12299	113.8	USA	840	NA2	2005	2230000000	2014	2984138801	2988710313	0.001530765	2005-0351USA
2005-0381	2005192N22155	265.7	TWN	158	WP4	2005	100000000	2014	141174388.7	141183485.9	6.44E-05	2005-0381TWN
2005-0382	2005192N11318	72.1	MEX	484	NA1	2005	400000000	2014	599247676.6	600546073.2	0.002164367	2005-0382MEX
2005-0467	2005236N23285	53	USA	840	NA2	2005	1.25E+11	2014	1.67E+11	1.67E+11	0.001099496	2005-0467USA
2005-0492	2005237N14148	33.7	CHN	156	WP3	2005	1900000000	2014	8712512761	8710256578	-0.000258992	2005-0492CHN
2005-0492	2005237N14148	291.6	TWN	158	WP4	2005	38000000	2014	53646267.7	53654485.48	0.000153173	2005-0492TWN
2005-0497	2005241N15155	180.7	JPN	392	WP4	2005	1000000000	2014	1019977855	1019949598	-2.77E-05	2005-0497JPN
2005-0510	2005248N08142	100.4	CHN	156	WP3	2005	1750000000	2014	8024682806	8036888245	0.001519832	2005-0510CHN
2005-0536	2005257N15120	42.6	VNM	704	WP1	2005	20000000	2014	64617086.41	64668886.84	0.000801331	2005-0536VNM
2005-0540	2005262N13127	48.9	CHN	156	WP3	2005	1040000000	2014	4768954354	4766559108	-0.000502384	2005-0540CHN
2005-0540	2005262N13127	35.3	VNM	704	WP1	2005	219250000	2014	708364809.8	714572541.1	0.00872529	2005-0540VNM
2005-0547	2005261N21290	59.5	USA	840	NA2	2005	16000000000	2014	21410861355	21364784783	-0.002154338	2005-0547USA
2005-0565	2005268N19146	171.4	CHN	156	WP3	2005	150000000	2014	687829954.8	688297480.7	0.000679481	2005-0565CHN
2005-0565	2005268N19146	325.7	TWN	158	WP4	2005	100000000	2014	141174388.7	446897893.5	1.152334217	2005-0565TWN
2005-0585	2005289N18282	40.3	MEX	484	NA1	2005	5000000000	2014	7490595958	7496293488	0.000760335	2005-0585MEX
2005-0585	2005289N18282	121.1	USA	840	NA2	2005	14300000000	2014	19135957336	19107419455	-0.001492435	2005-0585USA
2005-0611	2005301N13117	69.6	VNM	704	WP1	2005	11000000	2014	35539397.53	35639054.33	0.002800198	2005-0611VNM
2006-0043	2006006S11129	58.3	AUS	36	OC	2006	2354000	2014	4625625.837	4645427.663	0.00427176	2006-0043AUS
2006-0139	2006074S13158	50.5	AUS	36	OC	2006	1180000000	2014	2318707938	2328083679	0.004035367	2006-0139AUS
2006-0251	2006128N09138	96.9	CHN	156	WP3	2006	475000000	2014	1809189080	1810321031	0.000625472	2006-0251CHN
2006-0251	2006128N09138	208.5	PHL	608	WP2	2006	3328000	2014	7749707.397	7751266.496	0.000201161	2006-0251PHL
2006-0388	2006198N08152	39.8	CHN	156	WP3	2006	367000000	2014	1397836616	1388499752	-0.006701918	2006-0388CHN
2006-0410	2006209N13130	39.1	CHN	156	WP3	2006	900000000	2014	3427937205	3442895603	0.00435418	2006-0410CHN
2006-0437	2006216N07151	84.3	CHN	156	WP3	2006	2510000000	2014	9560135983	9551856301	-0.000866438	2006-0437CHN
2006-0466	2006237N13298	117	USA	840	NA2	2006	32860000	2014	41553786.12	41579194.68	0.000611275	2006-0466USA
2006-0504	2006252N13139	152	JPN	392	WP4	2006	2500000000	2014	2676605774	2678884715	0.000851067	2006-0504JPN
2006-0505	2006257N16259	320.3	MEX	484	NA1	2006	2700000	2014	3638886.137	3637726.519	-0.000318725	2006-0505MEX
2006-0517	2006268N12129	325.7	PHL	608	WP2	2006	113000000	2014	263136098.5	971316188.2	1.305980664	2006-0517PHL
2006-0517	2006268N12129	70.6	VNM	704	WP1	2006	624000000	2014	1750622103	1751243470	0.000354878	2006-0517VNM
2006-0600	2006298N12143	214.7	PHL	608	WP2	2006	9077000	2014	21137047.49	21130719.11	-0.000299443	2006-0600PHL
2006-0648	2006329N06150	199.7	PHL	608	WP2	2006	66400000	2014	154621565.9	154647768.3	0.000169447	2006-0648PHL
2006-0648	2006329N06150	78	VNM	704	WP1	2006	456000000	2014	1279300767	1278681154	-0.000484455	2006-0648VNM
2007-0095	2007066S12066	25.8	MDG	450	SI	2007	240000000	2014	348858871.4	125216890.9	-1.0246201	2007-0095MDG
2007-0164	2007151N14072	33.9	OMN	512	NI	2007	3900000000	2014	7513292712	7505906625	-0.000983553	2007-0164OMN
2007-0262	2007188N04148	325.7	JPN	392	WP4	2007	60000000	2014	64453546.68	256696088.4	1.381948092	2007-0262JPN
2007-0360	2007225N12331	122.2	BLZ	84	NA1	2007	14847000	2014	19476548.08	19485983.55	0.000484336	2007-0360BLZ
2007-0360	2007225N12331	47	DMA	212	NA1	2007	20000000	2014	24849111.57	24808275.31	-0.001644721	2007-0360DMA
2007-0360	2007225N12331	141.6	JAM	388	NA1	2007	300000000	2014	323956910.3	324363348.3	0.001253819	2007-0360JAM
2007-0360	2007225N12331	63.3	LCA	662	NA1	2007	40000000	2014	47496877.29	47537233.54	0.0008493	2007-0360LCA
2007-0360	2007225N12331	121.2	MEX	484	NA1	2007	600000000	2014	749255406.1	748407649.8	-0.001132106	2007-0360MEX
2007-0380	2007223N19136	52.6	CHN	156	WP3	2007	890555000	2014	2627998249	2633866360	0.002230431	2007-0380CHN
2007-0439	2007244N12303	79.5	HND	340	NA1	2007	6579000	2014	10588404.38	10570882.76	-0.001656164	2007-0439HND
2007-0457	2007257N16134	100.4	CHN	156	WP3	2007	638000000	2014	1882716826	1880610808	-0.001119232	2007-0457CHN
2007-0463	2007272N17125	35.8	VNM	704	WP1	2007	191000000	2014	459411646.6	458341782.1	-0.002331487	2007-0463VNM
2007-0470	2007254N18140	186.8	KOR	410	WP4	2007	70000000	2014	87997870.47	88050777.92	0.000601055	2007-0470KOR
2007-0479	2007240N17153	268	JPN	392	WP4	2007	1000000000	2014	1074225778	1074609445	0.000357093	2007-0479JPN
2007-0552	2007274N18131	32.4	CHN	156	WP3	2007	1077788000	2014	3180516618	3220120624	0.012375178	2007-0552CHN
2007-0556	2007314N10093	78.6	BGD	50	NI	2007	2300000000	2014	4994688046	4984479477	-0.002045977	2007-0556BGD
2007-0560	2007306N18133	168.8	PHL	608	WP2	2007	2971000	2014	5660826.737	5662083.054	0.000221907	2007-0560PHL
2007-0576	2007324N10140	83	PHL	608	WP2	2007	5000000	2014	9526803.663	9537264.891	0.001097481	2007-0576PHL
2007-0578	2007323N09128	76.1	PHL	608	WP2	2007	1000000	2014	1905360.733	1907024.547	0.000872847	2007-0578PHL
2007-0591	2007058S12135	25.8	AUS	36	OC	2007	100000000	2014	171950641.6	46970609.91	-1.297685383	2007-0591AUS
2007-0655	2007337S12186	59.1	FJI	242	OC	2007	652000	2014	858485.7575	859280.4569	0.000925271	2007-0655FJI
2008-0051	2008026S12179	74.7	FJI	242	OC	2008	30000000	2014	38176381.62	38122406.29	-0.001414841	2008-0051FJI
2008-0070	2008037S10055	39	MDG	450	SI	2008	60000000	2014	68034718.12	67971419.61	-0.000930818	2008-0070MDG
2008-0111	2008062S10064	73.7	MOZ	508	SI	2008	20000000	2014	29510844.15	29531686.48	0.000706011	2008-0111MOZ
2008-0155	2008104N08128	104	CHN	156	WP3	2008	49000000	2014	111703612.9	111831024.7	0.001139974	2008-0155CHN
2008-0155	2008104N08128	30.4	PHL	608	WP2	2008	16000000	2014	26139377.16	26438538.32	0.01137985	2008-0155PHL
2008-0184	2008117N11090	43.7	MMR	104	NI	2008	4000000000	2014	8216064485	8247757415	0.003850014	2008-0184MMR
2008-0197	2008135N12116	91	PHL	608	WP2	2008	99174000	2014	162021661.9	162262628.3	0.001486143	2008-0197PHL
2008-0249	2008169N08135	86.3	CHN	156	WP3	2008	175000000	2014	398941474.7	399337415.4	0.000991986	2008-0249CHN
2008-0249	2008169N08135	186.9	PHL	608	WP2	2008	284694000	2014	465107740.1	465172164.6	0.000138506	2008-0249PHL
2008-0292	2008206N22133	97.7	CHN	156	WP3	2008	73000000	2014	166415586.6	166555055.4	0.000837724	2008-0292CHN
2008-0304	2008203N18276	82.1	MEX	484	NA1	2008	75000000	2014	88822764.83	88951468.92	0.00144795	2008-0304MEX
2008-0304	2008203N18276	91.8	USA	840	NA2	2008	1200000000	2014	1428540902	1428581212	2.82E-05	2008-0304USA
2008-0338	2008229N18293	62.4	USA	840	NA2	2008	180000000	2014	214281135.2	214393281.6	0.000523224	2008-0338USA
2008-0352	2008238N13293	45.3	CUB	192	NA1	2008	2072000000	2014	2748386795	2735471659	-0.004710245	2008-0352CUB
2008-0352	2008238N13293	95.2	JAM	388	NA1	2008	66198000	2014	67028878.91	67033295.53	6.59E-05	2008-0352JAM
2008-0352	2008238N13293	75.2	USA	840	NA2	2008	7000000000	2014	8333155259	8311297726	-0.002626406	2008-0352USA
2008-0369	2008229N13147	83.3	CHN	156	WP3	2008	58000000	2014	132220603.1	132190363	-0.000228736	2008-0369CHN
2008-0369	2008229N13147	325.7	HKG	344	WP4	2008	380000	2014	505083.5374	918937.0251	0.598493758	2008-0369HKG
2008-0369	2008229N13147	40.9	PHL	608	WP2	2008	33870000	2014	55333794.03	54962062.88	-0.006740644	2008-0369PHL
2008-0378	2008241N19303	211.8	USA	840	NA2	2008	160000000	2014	190472120.2	190624644.9	0.000800451	2008-0378USA
2008-0384	2008245N17323	81.6	CUB	192	NA1	2008	1500000000	2014	1989662255	1988880448	-0.000393012	2008-0384CUB
2008-0384	2008245N17323	33.5	TCA	796	NA1	2008	500000000	2014	500000000	500063361	0.000126714	2008-0384TCA
2008-0384	2008245N17323	80.6	USA	840	NA2	2008	30000000000	2014	35713522539	35674564454	-0.001091445	2008-0384USA
2008-0426	2008262N16142	144.7	CHN	156	WP3	2008	824000000	2014	1878444430	1876942978	-0.000799626	2008-0426CHN
2008-0426	2008262N16142	25.8	PHL	608	WP2	2008	7420000	2014	12122136.16	5780902.116	-0.74047347	2008-0426PHL
2008-0437	2008272N15113	58.2	VNM	704	WP1	2008	6500000	2014	12209487.86	12248048.24	0.003153254	2008-0437VNM
2008-0441	2008268N12140	325.7	TWN	158	WP4	2008	90000000	2014	114489207.2	297519658.6	0.954999744	2008-0441TWN
2008-0552	2008320N08122	111.2	VNM	704	WP1	2008	1000000	2014	1878382.747	1876049.31	-0.001243031	2008-0552VNM
2009-0137	2009093S12062	48.7	MDG	450	SI	2009	5000000	2014	6241556.912	6276216.074	0.005537606	2009-0137MDG
2009-0165	2009123N10111	147.5	PHL	608	WP2	2009	30342000	2014	51295833	51293642.52	-4.27E-05	2009-0165PHL
2009-0321	2009215N20133	53.2	TWN	158	WP4	2009	250000000	2014	338247183.2	338441840.9	0.000575324	2009-0321TWN
2009-0384	2009239N12270	61.1	MEX	484	NA1	2009	40000000	2014	58422121.35	58579297.05	0.002686733	2009-0384MEX
2009-0399	2009254N14130	82.1	CHN	156	WP3	2009	295001000	2014	605154271.7	606293567.7	0.001880884	2009-0399CHN
2009-0414	2009268N14128	32.8	PHL	608	WP2	2009	237489000	2014	401496146.7	395915626.6	-0.013996812	2009-0414PHL
2009-0414	2009268N14128	48.9	VNM	704	WP1	2009	785000000	2014	1378777736	1372999963	-0.004199308	2009-0414VNM
2009-0422	2009270N10148	41.3	CHN	156	WP3	2009	35000000	2014	71797721.06	71181089.02	-0.008625556	2009-0422CHN
2009-0422	2009270N10148	39.4	PHL	608	WP2	2009	585379000	2014	989634942.4	984393842.4	-0.005310067	2009-0422PHL
2009-0422	2009270N10148	151.9	VNM	704	WP1	2009	200000	2014	351280.9518	351352.4226	0.000203437	2009-0422VNM
2009-0423	2009272N07164	142.6	JPN	392	WP4	2009	1000000000	2014	927176205.2	926315897.9	-0.00092831	2009-0423JPN
2009-0478	2009299N12153	325.7	PHL	608	WP2	2009	15194000	2014	25686800.03	43613859.99	0.529397747	2009-0478PHL
2009-0478	2009299N12153	45.4	VNM	704	WP1	2009	280000000	2014	491793332.5	489595236.2	-0.004479571	2009-0478VNM
2009-0554	2009346S10172	76.9	FJI	242	OC	2009	13300000	2014	20772286.48	20735822.7	-0.001756948	2009-0554FJI
2009-0609	2009313N11072	44.4	IND	356	NI	2009	300000000	2014	455879199.2	456382862.4	0.001104207	2009-0609IND
2010-0106	2010069S12188	25.8	FJI	242	OC	2010	39427000	2014	56286310.68	13492148.22	-1.428343453	2010-0106FJI
2010-0210	2010151N14065	39.6	OMN	512	NI	2010	1000000000	2014	1382561646	1385900125	0.002411794	2010-0210OMN
2010-0260	2010176N16278	46.5	MEX	484	NA1	2010	2000000000	2014	2485464847	2478270330	-0.002898834	2010-0260MEX
2010-0308	2010191N12138	325.7	CHN	156	WP3	2010	500000	2014	859123.4391	2692108.347	1.142167325	2010-0308CHN
2010-0308	2010191N12138	325.7	PHL	608	WP2	2010	8675000	2014	12369162.52	31196159.09	0.9250885	2010-0308PHL
2010-0308	2010191N12138	165	VNM	704	WP1	2010	500000	2014	803078.7658	803262.4956	0.000228756	2010-0308VNM
2010-0432	2010233N17119	39	VNM	704	WP1	2010	44000000	2014	70670931.39	70678446.19	0.000106329	2010-0432VNM
2010-0468	2010236N12341	41.5	ATG	28	NA1	2010	12600000	2014	13945942.61	14028748.46	0.005920072	2010-0468ATG
2010-0484	2010256N17137	91.9	CHN	156	WP3	2010	298285000	2014	512527270.1	513249853.4	0.001408851	2010-0484CHN
2010-0484	2010256N17137	303	TWN	158	WP4	2010	63100000	2014	75033445.7	75060353.7	0.000358549	2010-0484TWN
2010-0494	2010257N16282	62.4	MEX	484	NA1	2010	3900000000	2014	4846656451	4857140116	0.002160736	2010-0494MEX
2010-0543	2010285N13145	54	CHN	156	WP3	2010	420000000	2014	721663688.8	724623069.9	0.004092391	2010-0543CHN
2010-0543	2010285N13145	91.8	PHL	608	WP2	2010	275745000	2014	393168267.4	392849298.5	-0.000811608	2010-0543PHL
2010-0543	2010285N13145	44.7	TWN	158	WP4	2010	10000000	2014	11891195.83	11938433.23	0.003964599	2010-0543TWN
2010-0554	2010293N17093	53.7	MMR	104	NI	2010	57000000	2014	75300204.74	75386609.11	0.001146807	2010-0554MMR
2010-0571	2010302N09306	122.1	LCA	662	NA1	2010	500000	2014	548667.5019	549287.125	0.001128686	2010-0571LCA
2010-0571	2010302N09306	45.1	VCT	670	NA1	2010	25000000	2014	26706058.15	26769270.95	0.002364187	2010-0571VCT
2011-0070	2011028S13180	34.4	AUS	36	OC	2011	2500000000	2014	2626722487	2625314349	-0.000536226	2011-0070AUS
2011-0091	2011020S13182	129.2	TON	776	OC	2011	3000000	2014	3148217.183	3150478.22	0.000717938	2011-0091TON
2011-0272	2011205N12130	55	PHL	608	WP2	2011	63258000	2014	80315874.36	80536440.16	0.002742465	2011-0272PHL
2011-0328	2011233N15301	53.5	BHS	44	NA1	2011	40000000	2014	43522583.4	43398979.16	-0.002844043	2011-0328BHS
2011-0328	2011233N15301	44.8	DOM	214	NA1	2011	30000000	2014	34283168.75	34047442.12	-0.006899618	2011-0328DOM
2011-0328	2011233N15301	46.2	PRI	630	NA1	2011	500000000	2014	510433804.3	513965889.6	0.00689594	2011-0328PRI
2011-0328	2011233N15301	157.5	USA	840	NA2	2011	7300000000	2014	8229569135	8230835742	0.000153897	2011-0328USA
2011-0341	2011233N12129	55	PHL	608	WP2	2011	34452000	2014	43742174.96	43822836.01	0.001842313	2011-0341PHL
2011-0378	2011270N18139	325.7	PHL	608	WP2	2011	2655000	2014	3370935.635	4948189.699	0.38383145	2011-0378PHL
2011-0379	2011266N13139	72.5	CHN	156	WP3	2011	219000000	2014	303152614.2	303944727.8	0.002609512	2011-0379CHN
2011-0379	2011266N13139	67.4	PHL	608	WP2	2011	344173000	2014	436981179.1	436500548	-0.001100495	2011-0379PHL
2011-0385	2011279N10257	85.2	MEX	484	NA1	2011	27700000	2014	30846033.58	30773744.47	-0.002346297	2011-0385MEX
2011-0456	2011245N27269	39.9	USA	840	NA2	2011	750000000	2014	845503678.2	851364151.3	0.006907428	2011-0456USA
2011-0519	2011346N03156	54.3	PHL	608	WP2	2011	38082000	2014	48351024.81	48256972.54	-0.001947091	2011-0519PHL
2011-0566	2011360N09088	93.6	IND	356	NI	2011	375625000	2014	420146061.5	420291427.8	0.00034593	2011-0566IND
2012-0043	2012039S14075	90.3	MDG	450	SI	2012	100000000	2014	107598319.7	107520211.8	-0.000726185	2012-0043MDG
2012-0259	2012201N15129	160.1	CHN	156	WP3	2012	329000000	2014	402859805.3	402882496	5.63E-05	2012-0259CHN
2012-0260	2012209N11131	306.2	TWN	158	WP4	2012	27000000	2014	28883557.6	28892236.54	0.000300435	2012-0260TWN
2012-0276	2012215N12313	60.3	MEX	484	NA1	2012	300000000	2014	328342750.7	328480450.5	0.00041929	2012-0276MEX
2012-0282	2012215N23146	55	CHN	156	WP3	2012	1500000000	2014	1836746833	1830219334	-0.003560167	2012-0282CHN
2012-0294	2012225N16133	136.9	CHN	156	WP3	2012	262000000	2014	320818446.7	320777868.8	-0.00012649	2012-0294CHN
2012-0294	2012225N16133	33.5	PHL	608	WP2	2012	3000000	2014	3413756.742	3418483.017	0.001383522	2012-0294PHL
2012-0294	2012225N16133	61.3	VNM	704	WP1	2012	6800000	2014	8125989.117	8149995.198	0.00294988	2012-0294VNM
2012-0313	2012234N16315	75.7	USA	840	NA2	2012	2000000000	2014	2163578370	2161055349	-0.001166814	2012-0313USA
2012-0401	2012166N09269	46.1	MEX	484	NA1	2012	555000000	2014	607434088.9	610325397.7	0.00474858	2012-0401MEX
2012-0406	2012296N06135	51.5	CHN	156	WP3	2012	197000000	2014	241226084	241139506.5	-0.00035897	2012-0406CHN
2012-0406	2012296N06135	112.3	PHL	608	WP2	2012	1339000	2014	1523673.426	1521994.525	-0.001102485	2012-0406PHL
2012-0406	2012296N06135	100.4	VNM	704	WP1	2012	336000000	2014	401519462.3	400817204.3	-0.001750533	2012-0406VNM
2012-0410	2012296N14283	162.2	JAM	388	NA1	2012	16542000	2014	15483975.86	15480905.55	-0.000198309	2012-0410JAM
2012-0410	2012296N14283	94.3	USA	840	NA2	2012	50000000000	2014	54089459244	53991359585	-0.001815302	2012-0410USA
2012-0414	2012232N13141	255.1	JPN	392	WP4	2012	86000000	2014	67245080.24	67227907.25	-0.000255412	2012-0414JPN
2012-0414	2012232N13141	31.2	KOR	410	WP4	2012	450000000	2014	519378870.9	517916090.4	-0.002820377	2012-0414KOR
2012-0498	2012346S14180	244	FJI	242	OC	2012	8400000	2014	9481515.123	9479088.612	-0.000255953	2012-0498FJI
2012-0498	2012346S14180	83	WSM	882	OC	2012	133000000	2014	133663025.6	133838355.8	0.001310873	2012-0498WSM
2012-0500	2012331N03157	85.6	PHL	608	WP2	2012	898352000	2014	1022251732	1020502716	-0.00171241	2012-0500PHL
2012-0588	2012254N09135	325.7	JPN	392	WP4	2012	31000000	2014	24239505.67	42923630.54	0.571438735	2012-0588JPN
2012-0588	2012254N09135	198.7	KOR	410	WP4	2012	349000000	2014	402807168.8	403100611.2	0.000728228	2012-0588KOR
2013-0032	2013046S20042	44	MDG	450	SI	2013	25000000	2014	25169373.46	25243534.94	0.002942164	2013-0032MDG
2013-0249	2013187N20156	67.9	CHN	156	WP3	2013	460000000	2014	501902623.4	502723049.4	0.001633297	2013-0249CHN
2013-0258	2013178N09133	95.3	CHN	156	WP3	2013	177000000	2014	193123400.7	192852737.9	-0.001402485	2013-0258CHN
2013-0258	2013178N09133	263.2	PHL	608	WP2	2013	1000000	2014	1046897.37	1046966.916	6.64E-05	2013-0258PHL
2013-0272	2013220N12137	73.3	CHN	156	WP3	2013	2120000000	2014	2313116438	2310410970	-0.001170305	2013-0272CHN
2013-0272	2013220N12137	129.6	PHL	608	WP2	2013	32431000	2014	33951928.59	33991276.65	0.001158264	2013-0272PHL
2013-0306	2013228N23124	108.7	CHN	156	WP3	2013	376000000	2014	410250840	409855850.5	-0.000963264	2013-0306CHN
2013-0306	2013228N23124	36.1	TWN	158	WP4	2013	12000000	2014	12443691.25	12287826.89	-0.012604679	2013-0306TWN
2013-0341	2013210N13123	93.8	CHN	156	WP3	2013	20000000	2014	21821853.19	21795648.16	-0.001201584	2013-0341CHN
2013-0341	2013210N13123	70.9	VNM	704	WP1	2013	1000000	2014	1087504.092	1085162.161	-0.002155814	2013-0341VNM
2013-0401	2013281N12098	89	IND	356	NI	2013	633471000	2014	695703513	696115605.6	0.000592164	2013-0401IND
2013-0419	2013269N15118	43	VNM	704	WP1	2013	663230000	2014	721265338.8	723859353.8	0.003590026	2013-0419VNM
2013-0429	2013272N10135	41.9	CHN	156	WP3	2013	6700000000	2014	7310320819	7266229953	-0.006049579	2013-0429CHN
2013-0430	2013282N14132	148.9	PHL	608	WP2	2013	96723000	2014	101259054.3	101188259.5	-0.00069939	2013-0430PHL
2013-0430	2013282N14132	117.1	VNM	704	WP1	2013	76000000	2014	82650310.98	82572342.38	-0.0009438	2013-0430VNM
2013-0433	2013306N07162	50.9	PHL	608	WP2	2013	10000000000	2014	10468973696	10506773245	0.003604123	2013-0433PHL
2013-0433	2013306N07162	45.5	VNM	704	WP1	2013	734000000	2014	798228003.4	798138198.4	-0.000112512	2013-0433VNM
2013-0437	2013301N13142	141.4	PHL	608	WP2	2013	4729000	2014	4950777.661	4956830.361	0.001221829	2013-0437PHL
2014-0001	2014004S17183	39.4	TON	776	OC	2014	31000000	2014	31000000	30964281.91	-0.001152861	2014-0001TON
2014-0096	2014068S16169	31.3	VUT	548	OC	2014	2000000	2014	2000000	2008990.461	0.004485157	2014-0096VUT
2014-0227	2014190N08154	130.9	CHN	156	WP3	2014	4232973000	2014	4232973000	4228685985	-0.00101328	2014-0227CHN
2014-0227	2014190N08154	248.5	PHL	608	WP2	2014	820576000	2014	820576000	820579917.5	4.77E-06	2014-0227PHL
2014-0227	2014190N08154	40.8	VNM	704	WP1	2014	6200000	2014	6200000	6228610.472	0.004603978	2014-0227VNM
2014-0236	2014184N08147	35.4	JPN	392	WP4	2014	156000000	2014	156000000	156761680.5	0.004870686	2014-0236JPN
2014-0240	2014197N10137	49.9	CHN	156	WP3	2014	500000000	2014	500000000	498637013.1	-0.002729696	2014-0240CHN
2014-0240	2014197N10137	325.7	TWN	158	WP4	2014	20000000	2014	20000000	84602726.23	1.442234217	2014-0240TWN
2014-0310	2014212N11242	37	USA	840	NA2	2014	66000000	2014	66000000	66401401.65	0.006063423	2014-0310USA
2014-0316	2014209N12152	300.1	JPN	392	WP4	2014	200000000	2014	200000000	200068150.7	0.000340696	2014-0316JPN
2014-0333	2014253N13260	66.1	MEX	484	NA1	2014	2500000000	2014	2500000000	2501601560	0.000640419	2014-0333MEX
2014-0390	2014254N10142	79.2	CHN	156	WP3	2014	2900000000	2014	2900000000	2892991825	-0.002419537	2014-0390CHN
2014-0390	2014254N10142	99.7	PHL	608	WP2	2014	19183000	2014	19183000	19172694.48	-0.000537366	2014-0390PHL
2014-0390	2014254N10142	101.3	VNM	704	WP1	2014	4500000	2014	4500000	4496723.336	-0.000728413	2014-0390VNM
2014-0392	2014279N11096	67.7	IND	356	NI	2014	7000000000	2014	7000000000	6989678402	-0.001475602	2014-0392IND
2014-0396	2014275N06166	255.2	JPN	392	WP4	2014	100000000	2014	100000000	100017513.4	0.000175118	2014-0396JPN
2014-0479	2014334N02156	85.4	PHL	608	WP2	2014	113878000	2014	113878000	113992423.7	0.001004287	2014-0479PHL
2014-0497	2014362N07130	57	PHL	608	WP2	2014	17688000	2014	17688000	17619650.11	-0.003871681	2014-0497PHL
2015-0017	2015012N09146	107.6	PHL	608	WP2	2015	1000000	2014	972027.6618	973519.9527	0.001534058	2015-0017PHL
2015-0053	2015045S12145	25.8	AUS	36	OC	2015	78000000	2014	84702479.43	2995180.152	-3.342140494	2015-0053AUS
2015-0079	2015047S15152	102.2	AUS	36	OC	2015	546000000	2014	592917356	592586612.4	-0.00055798	2015-0079AUS
2015-0093	2015066S08170	47.5	VUT	548	OC	2015	449400000	2014	496316510.4	497403875.7	0.002188474	2015-0093VUT
2015-0105	2015085N06162	45.7	FSM	583	OC	2015	11000000	2014	11098409.57	11055456.77	-0.003877684	2015-0105FSM
2015-0176	2015122N07144	228.3	JPN	392	WP4	2015	23200000	2014	25604132.8	25609493.6	0.000209351	2015-0176JPN
2015-0176	2015122N07144	193.8	PHL	608	WP2	2015	348000	2014	338265.6263	338117.5537	-0.000437837	2015-0176PHL
2015-0244	2015180N09160	37.4	CHN	156	WP3	2015	940000000	2014	890531131.4	891327043.9	0.000893351	2015-0244CHN
2015-0278	2015183N13130	169.9	CHN	156	WP3	2015	213000000	2014	201790564.9	201653318.2	-0.000680376	2015-0278CHN
2015-0278	2015183N13130	50.2	PHL	608	WP2	2015	2218000	2014	2155957.354	2153497.386	-0.001141661	2015-0278PHL
2015-0339	2015211N13162	61.1	CHN	156	WP3	2015	1282690000	2014	1215186571	1216891387	0.001401942	2015-0339CHN
2015-0458	2015263N14148	120.2	CHN	156	WP3	2015	661000000	2014	626213912.6	626317002.2	0.00016461	2015-0458CHN
2015-0462	2015285N14151	107	PHL	608	WP2	2015	210985000	2014	205083256.2	204978171.4	-0.000512532	2015-0462PHL
2015-0470	2015293N13266	100	MEX	484	NA1	2015	823000000	2014	924242990.8	923900657.4	-0.000370462	2015-0470MEX
2015-0473	2015242N12343	73.3	CPV	132	NA1	2015	1100000	2014	1281242.483	1282841.967	0.001247607	2015-0473CPV
2015-0479	2015270N27291	25.8	BHS	44	NA1	2015	90000000	2014	83627197.41	1129342.51	-4.304733181	2015-0479BHS
2015-0484	2015301N11065	67.3	YEM	887	NI	2015	200000000	2014	189625777.2	189687123.7	0.000323461	2015-0484YEM
2015-0490	2015273N12130	126.8	CHN	156	WP3	2015	4200000000	2014	3978968885	3980510860	0.000387456	2015-0490CHN
2015-0490	2015273N12130	46.9	PHL	608	WP2	2015	1300000	2014	1263635.96	1268652.402	0.003961988	2015-0490PHL
2015-0543	2015344N07145	189.3	PHL	608	WP2	2015	135217000	2014	131434664.3	131332251	-0.000779499	2015-0543PHL
2016-0041	2016041S14170	65.2	FJI	242	OC	2016	600000000	2014	575865848.2	575863677.2	-3.77E-06	2016-0041FJI
2016-0175	2016138N10081	44.8	BGD	50	NI	2016	600000000	2014	468492129.6	469418303.5	0.001974974	2016-0175BGD
2016-0268	2016207N17116	118.2	VNM	704	WP1	2016	191000000	2014	173254832	172984694.3	-0.00156041	2016-0268VNM
2016-0319	2016248N15255	102.2	MEX	484	NA1	2016	50000000	2014	60984824.31	60888078.84	-0.001587646	2016-0319MEX
2016-0322	2016242N24279	84.6	USA	840	NA2	2016	600000000	2014	561979044.5	561035932.5	-0.001679608	2016-0322USA
2016-0342	2016253N13144	145.2	CHN	156	WP3	2016	2300000000	2014	2154362604	2152625313	-0.000806731	2016-0342CHN
2016-0342	2016253N13144	25.8	PHL	608	WP2	2016	4913000	2014	4585811.217	269488.5479	-2.834196402	2016-0342PHL
2016-0350	2016266N11144	73.3	CHN	156	WP3	2016	830000000	2014	777443896.3	776944854	-0.000642107	2016-0350CHN
2016-0350	2016266N11144	314.9	TWN	158	WP4	2016	110000000	2014	109825691.6	109814310.5	-0.000103634	2016-0350TWN
2016-0361	2016269N15165	109	KOR	410	WP4	2016	126000000	2014	125690947.1	125667384.4	-0.000187483	2016-0361KOR
2016-0485	2016341N08092	116.9	IND	356	NI	2016	1000000000	2014	890280689.2	888918839.2	-0.001530857	2016-0485IND
2016-0503	2016355N07146	192.8	PHL	608	WP2	2016	103661000	2014	96757536.45	96759817.38	2.36E-05	2016-0503PHL
2017-0051	2017043S19040	42.6	MOZ	508	SI	2017	17000000	2014	22801692.01	22709916.84	-0.00403305	2017-0051MOZ
2017-0075	2017061S11061	63.7	MDG	450	SI	2017	20000000	2014	18562954.38	18597400.42	0.001853914	2017-0075MDG
2017-0105	2017081S13152	31.1	AUS	36	OC	2017	2700000000	2014	2988753820	3008926312	0.00672679	2017-0105AUS
2017-0281	2017195N16114	53.8	CHN	156	WP3	2017	3600000	2014	3083629.94	3082466.557	-0.000377348	2017-0281CHN
2017-0281	2017195N16114	30.3	VNM	704	WP1	2017	71000000	2014	59078283.51	58458649.26	-0.01054375	2017-0281VNM
2017-0334	2017219N16279	146.1	MEX	484	NA1	2017	2000000	2014	2284434.574	2285643.247	0.000528951	2017-0334MEX
2017-0352	2017232N19130	147.2	CHN	156	WP3	2017	3500000000	2014	2997973553	2996468738	-0.00050207	2017-0352CHN
2017-0352	2017232N19130	151.2	HKG	344	WP4	2017	755500000	2014	644890817.2	644839735.2	-7.92E-05	2017-0352HKG
2017-0352	2017232N19130	131.8	MAC	446	WP4	2017	1420000000	2014	1560609286	1560092036	-0.000331496	2017-0352MAC
2017-0362	2017228N14314	28.7	USA	840	NA2	2017	95000000000	2014	85426343701	85468133336	0.000489069	2017-0362USA
2017-0381	2017242N16333	60.9	ATG	28	NA1	2017	250000000	2014	211176356.8	211075260.6	-0.000478843	2017-0381ATG
2017-0381	2017242N16333	25.8	BHS	44	NA1	2017	2000000	2014	1801876.321	611837.893	-1.080116435	2017-0381BHS
2017-0381	2017242N16333	33.7	CUB	192	NA1	2017	13200000000	2014	10992753818	10904237007	-0.008084882	2017-0381CUB
2017-0381	2017242N16333	105.5	KNA	659	NA1	2017	20000000	2014	18484889.46	18486650.71	9.53E-05	2017-0381KNA
2017-0381	2017242N16333	48.7	TCA	796	NA1	2017	500000000	2014	500000000	500378956.6	0.000757626	2017-0381TCA
2017-0381	2017242N16333	84.4	USA	840	NA2	2017	57000000000	2014	51255806221	51206754325	-0.00095746	2017-0381USA
2017-0381	2017242N16333	25.8	VGB	92	NA1	2017	3000000000	2014	3000000000	623619994.9	-1.570826367	2017-0381VGB
2017-0383	2017260N12310	25.8	DMA	212	NA1	2017	1456000000	2014	1534596212	895118589.3	-0.53906636	2017-0383DMA
2017-0383	2017260N12310	45.1	DOM	214	NA1	2017	63000000	2014	54813712.03	54934660.22	0.002204101	2017-0383DOM
2017-0383	2017260N12310	59.3	PRI	630	NA1	2017	68000000000	2014	67009049565	67027181962	0.00027056	2017-0383PRI
2017-0406	2017253N14130	48.6	VNM	704	WP1	2017	484000000	2014	402730834.1	401345556.4	-0.00344564	2017-0406VNM
2017-0410	2017277N11279	90.2	USA	840	NA2	2017	250000000	2014	224806167.6	224976913.1	0.000759235	2017-0410USA
2017-0422	2017304N11127	58.9	VNM	704	WP1	2017	1000000000	2014	832088500.2	835046981.4	0.003549183	2017-0422VNM
2017-0432	2017288N09138	270	JPN	392	WP4	2017	1000000000	2014	995484463.5	995126307.3	-0.000359846	2017-0432JPN
2017-0468	2017252N14147	325.7	JPN	392	WP4	2017	500000000	2014	497742231.7	622698955.4	0.223980848	2017-0468JPN
2017-0485	2017236N15129	285.9	CHN	156	WP3	2017	56000000	2014	47967576.85	47983654.85	0.000335128	2017-0485CHN
2017-0508	2017333N06082	44.1	LKA	144	NI	2017	346000000	2014	314311010.2	316529153.6	0.007032376	2017-0508LKA
