# Supplementary material for: Regional tropical cyclone impact functions for globally consistent risk assessments
Source: Copernicus journal article supplement (doi:10.5194/nhess-21-393-2021), 2021-01-29
Supplement: Supplementary file 1 [file nhess-21-393-2021-supplement.zip › Table_S3_region_and_AAD_per_country.csv]

country_id	alpha3	name	used_for_calibration	region	AAD_EMDAT [mio. USD]	TAV_GAR13 [mio. USD]	AAD_GAR13 [mio. USD]	AAD/TAV_GAR13 [permil]	TAV_2014	AAD_defaultIF [mio. USD]	AAD_RMSF_optimized [mio. USD]	AAD_TDR_optimized [mio. USD]	AAD/TAV_defaultIF [permil]	AAD/TAV_RMSF_optimized [permil]	AAD/TAV_TDR_optimized [permil]
533	ABW	Aruba	no	NA1	0	6526	11	1.7	3304.837609	0	0	0	0	0	0
4	AFG	Afghanistan	no	NI	0	16132			25549.56812	0	0	0	0	0	0
24	AGO	Angola	no	ROW	0	25225			136000	0	0	0	0	0	0
660	AIA	Anguilla	no	NA1	5.320131579	20	0	15	218.765896	0	0	0	0	0	0
8	ALB	Albania	no	ROW	0	13964			43889.45925	0	0	0	0	0	0
20	AND	Andorra	no	ROW	0				4179.172427	0	0	0	0	0	0
784	ARE	United Arab Emirates	no	NI	0	248015	2	0	921000	0	0	0	0	0	0
32	ARG	Argentina	no	NA1	0	403909			1310000	0	0	0	0	0	0
51	ARM	Armenia	no	NI	0	14187			37457.69155	0	0	0	0	0	0
16	ASM	American Samoa	no	OC	5.113975623				801.97532	2.241959103	12.11388535	4.278131807	2.795546256	15.10506003	5.334493095
28	ATG	Antigua and Barbuda	yes	NA1	36.41553695	2428	12	4.9	1095.937306	9.130134162	23.40663425	15.03414843	8.330890929	21.35763983	13.71807342
36	AUS	Australia	yes	OC	429.8723916	1832960	84	0.1	5890000	184.9343839	1049.75365	347.5182468	0.031398028	0.178226426	0.0590014
40	AUT	Austria	no	ROW	0	615592			1770000	0	0	0	0	0	0
31	AZE	Azerbaijan	no	NI	0	45197			154000	0	0	0	0	0	0
108	BDI	Burundi	no	ROW	0	168			4239.83007	0	0	0	0	0	0
56	BEL	Belgium	no	ROW	0	739159			1920000	0	0	0	0	0	0
204	BEN	Benin	no	ROW	0	3585			11138.79287	0	0	0	0	0	0
854	BFA	Burkina Faso	no	ROW	0	3120			24879.60757	0	0	0	0	0	0
50	BGD	Bangladesh	yes	NI	445.6713527	72949	58	0.8	441000	758.7403574	1958.294324	936.8261871	1.720499677	4.440576699	2.12432242
100	BGR	Bulgaria	no	ROW	0	70023			135000	0	0	0	0	0	0
48	BHR	Bahrain	no	NI	0	32575			84338.6799	0	0	0	0	0	0
44	BHS	Bahamas	yes	NA1	102.8506895	21313	70	3.3	8409.399031	79.83627844	176.9954909	123.2246223	9.493696059	21.04734123	14.65320195
70	BIH	Bosnia and Herzegovina	no	ROW	0	10433			42615.61185	0	0	0	0	0	0
652	BLM	Saint Barthélemy	no	ROW	0				318.0462	0	0	0	0	0	0
112	BLR	Belarus	no	ROW	4.844395429	74427			255000	0	0	0	0	0	0
84	BLZ	Belize	yes	NA1	27.64525981	1251	6	4.7	3489.440304	7.679071109	19.83285659	12.64900418	2.200659831	5.683678432	3.624937834
60	BMU	Bermuda	yes	NA1	16.1672565				6951.75406	86.30051292	204.1444043	136.7341706	12.41420686	29.36588414	19.66901726
68	BOL	Bolivia, Plurinational State of	no	NA1	0	13112			56441.7837	0	0	0	0	0	0
76	BRA	Brazil	no	ROW	33.7971537	1715746			5330000	0.220637204	0.238835987	0.043911341	4.14E-05	4.48E-05	8.24E-06
52	BRB	Barbados	no	NA1	8.929967288	4677	10	2.2	3229.439513	16.4852994	35.56015121	25.17937231	5.104693658	11.01124547	7.79682425
96	BRN	Brunei Darussalam	no	ROW	0	20094	11	0.6	15022.94572	0	0	0	0	0	0
64	BTN	Bhutan	no	NI	0	1167		0	2443.117529	0	0	0	0	0	0
72	BWA	Botswana	no	ROW	0	18941	0	0	35640.82034	0	0	0	0	0	0
140	CAF	Central African Republic	no	ROW	0	916			9424.970208	0	0	0	0	0	0
124	CAN	Canada	yes	NA2	13.69972931	2051584	310	0.2	6590000	534.065925	295.3665008	254.2497475	0.08104187	0.04482041	0.038581145
756	CHE	Switzerland	no	ROW	0	839518			2350000	0	0	0	0	0	0
152	CHL	Chile	no	NA1	0	326640			646000	0	0	0	0	0	0
156	CHN	China	yes	WP3	11943.46191	4512825	8954	2	31400000	44086.65348	32898.40706	8557.858537	1.40403355	1.04771997	0.272543266
384	CIV	Côte d'Ivoire	no	ROW	0	17298			78452.65564	0	0	0	0	0	0
120	CMR	Cameroon	no	ROW	0	16950			69205.47643	0	0	0	0	0	0
180	COD	Congo, Democratic Republic of the	no	SI	0				143000	0	0	0	0	0	0
178	COG	Congo	no	ROW	0	12566			55951.75183	0	0	0	0	0	0
184	COK	Cook Islands	no	OC	0.657894737				304.451284	1.029511535	4.443596766	1.871124507	3.381531263	14.5954279	6.145891329
170	COL	Colombia	no	NA1	12.84652101	325385	7	0	1070000	0.858057413	2.545925342	1.498303927	0.000801923	0.002379369	0.001400284
174	COM	Comoros	no	SI	5.750239977	310	1	3.1	1605.454637	0.981725519	8.991110173	5.18040075	0.611493777	5.60035143	3.22675
132	CPV	Cabo Verde	yes	NA1	1.077827702	1949		0	2319.739822	0.035813687	0.106752435	0.06264905	0.015438665	0.046019141	0.027006929
188	CRI	Costa Rica	no	NA1	55.41655177	38475	1	0	94696.52412	0.071668298	0.214397945	0.125542289	0.000756821	0.002264053	0.001325733
192	CUB	Cuba	yes	NA1	795.283117	46280	40	0.9	101000	448.9982581	1153.490127	738.6989702	4.445527308	11.42069433	7.31385119
531	CUW	Curaçao	no	ROW	0				3901.36672	0	0	0	0	0	0
136	CYM	Cayman Islands	no	NA1	181.2919911	3603	42	11.5	4000.083197	0	0	0	0	0	0
196	CYP	Cyprus	no	ROW	0	23484			69313.97475	0	0	0	0	0	0
203	CZE	Czechia	no	ROW	0	336714			291000	0	0	0	0	0	0
276	DEU	Germany	no	ROW	0.02046424	5800986			15500000	8.558463874	9.270890381	1.686281079	0.000552159	0.000598122	0.000108792
262	DJI	Djibouti	no	NI	0	2525			4264.903202	0	0	0	0	0	0
212	DMA	Dominica	yes	NA1	62.6698059	356	1	3.7	895.1186094	6.771299974	13.18941963	9.844645026	7.564695787	14.73482899	10.99814586
208	DNK	Denmark	no	ROW	0	381265			1240000	0	0	0	0	0	0
214	DOM	Dominican Republic	yes	NA1	213.9780799	72573	61	0.8	183000	214.6301518	593.6914484	364.2225256	1.172842359	3.244215565	1.990287025
12	DZA	Algeria	no	ROW	0	259977			203000	0	0	0	0	0	0
218	ECU	Ecuador	no	NA1	0	68550			263000	0	0	0	0	0	0
818	EGY	Egypt	no	ROW	0	234939			405000	0	0	0	0	0	0
232	ERI	Eritrea	no	NI	0	1892			2548.961382	0	0	0	0	0	0
724	ESP	Spain	no	ROW	209.3910644	2695139			5350000	7.332006514	7.941690598	1.445780369	0.001370469	0.001484428	0.000270239
233	EST	Estonia	no	ROW	0	28069			97155.25247	0	0	0	0	0	0
231	ETH	Ethiopia	no	NI	0	5141			105000	0	0	0	0	0	0
246	FIN	Finland	no	ROW	0	209050			1100000	0	0	0	0	0	0
242	FJI	Fiji	yes	OC	48.28129284	2100	13	6	2358.097658	64.36560403	249.3353296	111.0093746	27.29556336	105.7357946	47.07581735
238	FLK	Falkland Islands (Malvinas)	no	NA1	0				351.472232	0	0	0	0	0	0
250	FRA	France	no	ROW	0.000467448	3653264			12000000	2071.906778	2224.985548	447.0961211	0.172658898	0.185415462	0.03725801
234	FRO	Faroe Islands	no	ROW	0	1012			3505.427743	0	0	0	0	0	0
583	FSM	Micronesia, Federated States of	yes	OC	0.741312581	585	3	4.4	396.6215717	0.432450304	2.753372563	0.845326958	1.090334805	6.942064577	2.131318664
266	GAB	Gabon	no	ROW	0	25086			47223.32196	0	0	0	0	0	0
826	GBR	United Kingdom of Great Britain and Northern Ireland	no	ROW	17.08960305	3684040			10100000	700.1834092	757.2536257	140.1827314	0.06932509	0.074975607	0.013879478
268	GEO	Georgia	no	NI	0	21157			61359.12925	0	0	0	0	0	0
831	GGY	Guernsey	no	ROW	0				4321.6866	0	0	0	0	0	0
288	GHA	Ghana	no	ROW	0	12649			81395.57938	0	0	0	0	0	0
292	GIB	Gibraltar	no	ROW	0	3141			2549.35856	0	0	0	0	0	0
324	GIN	Guinea	no	ROW	0	3259			12942.46363	0	0	0	0	0	0
270	GMB	Gambia	no	ROW	0	680			2402.179512	0	0	0	0	0	0
624	GNB	Guinea-Bissau	no	ROW	0	466			138.115467	0	0	0	0	0	0
226	GNQ	Equatorial Guinea	no	ROW	0	6765			5148.942289	0	0	0	0	0	0
300	GRC	Greece	no	ROW	0	642888			1180000	0	0	0	0	0	0
308	GRD	Grenada	no	NA1	37.01273453	1229	1	1.2	811.5699466	0.180223924	0.535773084	0.314948307	0.222068257	0.660168709	0.388072906
304	GRL	Greenland	no	ROW	0				3539.339338	0	0	0	0	0	0
320	GTM	Guatemala	no	NA1	140.0853736	38263	18	0.5	123000	0.529495931	1.506470758	0.908408477	0.004304845	0.01224773	0.007385435
316	GUM	Guam	yes	OC	27.1678714				6907.21512	244.6397189	898.7286962	414.6151413	35.4179962	130.1144789	60.02638315
328	GUY	Guyana	no	NA1	0	3468	0	0.1	7610.038714	0	0	0	0	0	0
344	HKG	Hong Kong	yes	WP4	37.66954428	1138019	927	0.8	604000	3284.26243	299.7167651	89.06855563	5.43752058	0.49621981	0.147464496
340	HND	Honduras	yes	NA1	332.0468131	18844	70	3.7	54108.69428	0.860380787	2.482557631	1.484302527	0.015900971	0.045880938	0.027431867
191	HRV	Croatia	no	ROW	0	65145			201000	0	0	0	0	0	0
332	HTI	Haiti	no	NA1	104.7852117	8553	32	3.7	51057.62892	12.25429931	34.77201728	20.93313022	0.240009173	0.681034706	0.409990254
348	HUN	Hungary	no	ROW	0	286209			522000	0	0	0	0	0	0
360	IDN	Indonesia	no	WP1	0	575183	41	0.1	3140000	4.724050507	17.5564542	8.114637955	0.001504475	0.005591227	0.00258428
833	IMN	Isle of Man	no	ROW	0				9264.848448	0	0	0	0	0	0
356	IND	India	yes	NI	1427.254199	1429881	230	0.2	5390000	2446.002214	6464.668152	3034.166236	0.45380375	1.199381846	0.56292509
372	IRL	Ireland	no	ROW	0.089639368	244117			705000	156.456544	169.0130523	31.72827114	0.221924176	0.239734826	0.04500464
364	IRN	Iran, Islamic Republic of	no	NI	0	676481	0		174000	0	0	0	0	0	0
368	IRQ	Iraq	no	NI	0	47245			413000	0	0	0	0	0	0
352	ISL	Iceland	no	ROW	0	25742			71545.20003	0	0	0	0	0	0
376	ISR	Israel	no	NI	0	293550			308000	0	0	0	0	0	0
380	ITA	Italy	no	ROW	0	3701619			9220000	0.418482307	0.453558811	0.082030264	4.54E-05	4.92E-05	8.90E-06
388	JAM	Jamaica	yes	NA1	155.8270618	28963	59	2	68040.51057	403.8975283	1009.800152	656.8555441	5.93613312	14.8411607	9.653889111
832	JEY	Jersey	no	ROW	0				6335.9792	0	0	0	0	0	0
400	JOR	Jordan	no	NI	0	40997			105000	0	0	0	0	0	0
392	JPN	Japan	yes	WP4	1750.849501	14617394	45933	3.1	18400000	132410.7844	12803.18184	3822.818751	7.196238283	0.6958251	0.207761889
398	KAZ	Kazakhstan	no	NI	0	180409			560000	0	0	0	0	0	0
404	KEN	Kenya	no	ROW	0	18470			121000	0	0	0	0	0	0
417	KGZ	Kyrgyzstan	no	NI	0	3644			28983.38751	0	0	0	0	0	0
116	KHM	Cambodia	yes	WP1	0.001276473	4335	0	0.1	27339.16165	0.052564323	0.192207653	0.089828027	0.001922675	0.007030488	0.003285691
296	KIR	Kiribati	no	OC	0				224.1333226	0	0	0	0	0	0
659	KNA	Saint Kitts and Nevis	yes	NA1	49.03462175	2			1143.541173	6.121842768	16.25385727	10.22292884	5.353408266	14.21361789	8.939712085
410	KOR	Korea, Republic of	yes	WP4	879.0685804	2787207	8652	3.1	5150000	10462.84397	982.3263128	292.5567035	2.031620188	0.190742973	0.056807127
414	KWT	Kuwait	no	NI	0	202236			227000	0	0	0	0	0	0
418	LAO	Lao People's Democratic Republic	no	WP1	7.116242518	2322	1	0.3	28477.30352	8.317458223	31.36053481	14.33695059	0.292073237	1.10124664	0.503451831
422	LBN	Lebanon	no	NI	0	56965			140000	0	0	0	0	0	0
430	LBR	Liberia	no	ROW	0	515			4323.187651	0	0	0	0	0	0
662	LCA	Saint Lucia	yes	NA1	24.95772411	543	2	2.7	1429.965253	14.16519037	25.36998239	19.6798239	9.905968229	17.74167752	13.76244902
438	LIE	Liechtenstein	no	ROW	0	8070			8303.089863	0	0	0	0	0	0
144	LKA	Sri Lanka	yes	NI	9.948484185	49967	5	0.1	190000	21.37698705	67.98378109	27.3124541	0.112510458	0.357809374	0.143749758
426	LSO	Lesotho	no	ROW	0	3522			937.9495124	0	0	0	0	0	0
440	LTU	Lithuania	no	ROW	0	53397			150000	0	0	0	0	0	0
442	LUX	Luxembourg	no	ROW	0	45036			161000	0	0	0	0	0	0
428	LVA	Latvia	no	ROW	0	39277			183000	0	0	0	0	0	0
446	MAC	Macao	yes	WP4	40.75318538	96993	68	0.7	69032.23783	718.6128728	71.40641458	21.36710184	10.40981569	1.03439229	0.309523529
663	MAF	Saint Martin (French part)	no	ROW	107.8947368				700.32526	0	0	0	0	0	0
504	MAR	Morocco	no	ROW	0.002323335	136300			372000	0	0	0	0	0	0
492	MCO	Monaco	no	ROW	0	5380			8805.808959	0	0	0	0	0	0
498	MDA	Moldova, Republic of	no	ROW	0	9896			40763.17867	0	0	0	0	0	0
450	MDG	Madagascar	yes	SI	133.9035508	2575	15	5.8	17469.94299	23.37188736	219.4365773	122.4340334	1.337834209	12.56080672	7.008267485
462	MDV	Maldives	no	NI	0	907			5452.881517	0	0	0	0	0	0
484	MEX	Mexico	yes	NA1	1291.180309	1818298	3472	1.9	4040000	1510.541586	3614.043174	2400.971528	0.373896432	0.894565142	0.594299883
584	MHL	Marshall Islands	no	OC	0				228.3962102	0	0	0	0	0	0
807	MKD	North Macedonia	no	ROW	0	12415			31751.26235	0	0	0	0	0	0
466	MLI	Mali	no	SI	0	3869			27538.32415	0	0	0	0	0	0
470	MLT	Malta	no	ROW	0	18630			25901.52612	0	0	0	0	0	0
104	MMR	Myanmar	yes	NI	220.2399701	20572	3	0.1	57323.01747	41.29026224	125.3973495	52.40973493	0.720308596	2.187556676	0.91428779
499	MNE	Montenegro	no	ROW	0	2738			7809.751547	0	0	0	0	0	0
496	MNG	Mongolia	no	NI	0	9273			38689.24794	0	0	0	0	0	0
580	MNP	Northern Mariana Islands	no	OC	0				1053.9178	35.108119	149.6385992	62.01527245	33.31200877	141.9831786	58.84260846
508	MOZ	Mozambique	yes	SI	12.6101706	5633	8	1.4	26594.53154	3.671743499	31.31184284	18.40616194	0.138063853	1.177378996	0.692103259
478	MRT	Mauritania	no	ROW	0	3622			15658.50987	0	0	0	0	0	0
500	MSR	Montserrat	yes	NA1	6.842105263				54.629112	0.459040188	1.009252978	0.703350396	8.402849169	18.47463634	12.8750106
480	MUS	Mauritius	no	SI	25.87045647	13089	69	5.3	32715.98341	244.6616366	1538.212455	1006.565019	7.478351897	47.01715475	30.76676639
454	MWI	Malawi	no	SI	0	1883	0	0.1	12643.33491	6.72E-06	8.35E-05	4.14E-05	5.32E-07	6.61E-06	3.27E-06
458	MYS	Malaysia	yes	WP1	4.675834166	318727	6	0	723000	74.332432	265.9327693	126.342115	0.102811109	0.367818491	0.174747047
516	NAM	Namibia	no	ROW	0	7239			24601.70477	0	0	0	0	0	0
540	NCL	New Caledonia	yes	OC	1.067147455	4771	2	0.3	3345.530553	58.66527197	220.8450339	100.6955532	17.53541659	66.01196145	30.09853045
562	NER	Niger	no	ROW	0	2800			36522.16029	0	0	0	0	0	0
574	NFK	Norfolk Island	no	OC	0				41.346006	0	0	0	0	0	0
566	NGA	Nigeria	no	ROW	0	121669			551000	0	0	0	0	0	0
558	NIC	Nicaragua	yes	NA1	160.2147278	10935	3	0.3	44014.58661	1.677283331	4.600408351	2.824611692	0.038107443	0.104520085	0.064174446
570	NIU	Niue	no	OC	1.052631579				12.4724	0.138464853	0.356929911	0.209300049	11.10170078	28.61758053	16.78105651
528	NLD	Netherlands	no	ROW	0	1593735			3190000	0	0	0	0	0	0
578	NOR	Norway	no	ROW	0.326326625	386892			1760000	0.075466975	0.08180228	0.014775896	4.29E-05	4.65E-05	8.40E-06
524	NPL	Nepal	no	NI	0	6537	2	0.3	53023.44092	0	0	0	0	0	0
520	NRU	Nauru	no	OC	0				145.9525012	0	0	0	0	0	0
554	NZL	New Zealand	no	OC	0	238609	30	0.1	740000	57.15699129	431.958799	116.4893731	0.077239177	0.583728107	0.157418072
512	OMN	Oman	yes	NI	239.3976152	42201	2	0.1	168000	4.004719214	12.39196304	5.097806135	0.023837614	0.073761685	0.030344084
586	PAK	Pakistan	no	NI	72.38311534	170444	24	0.1	452000	6.745095908	15.57595898	8.15212366	0.014922779	0.034460086	0.018035672
591	PAN	Panama	no	NA1	13.35927674	30296	2	0.1	94748.7912	2.89E-06	8.71E-06	5.08E-06	3.05E-08	9.19E-08	5.36E-08
604	PER	Peru	no	NA1	1.090453459	189980			488000	15.57569642	31.45464874	22.93815038	0.031917411	0.064456247	0.047004407
608	PHL	Philippines	yes	WP2	1099.193247	186193	2039	11	628000	21763.98575	14027.49196	828.503797	34.65602827	22.33677064	1.319273562
585	PLW	Palau	no	OC	0	279	1	1.8	306.4158117	2.326310481	8.547358978	3.959419862	7.592005347	27.89464072	12.92172176
598	PNG	Papua New Guinea	yes	OC	0.184179695	5433	0	0.1	27844.44644	0.024138699	0.179228428	0.049029346	0.000866913	0.006436775	0.00176083
616	POL	Poland	no	ROW	0	659150			1230000	0	0	0	0	0	0
630	PRI	Puerto Rico	yes	NA1	1918.204234	135818	795	5.9	128000	1509.199458	3140.777485	2244.128323	11.79062076	24.5373241	17.53225252
408	PRK	Korea, Democratic People's Republic of	no	ROW	160.8028947	27936	20	0.7	49889.6	33.89365087	36.62607048	6.839777584	0.679373073	0.734142396	0.137098265
620	PRT	Portugal	no	ROW	0	296296	0		985000	0	0	0	0	0	0
600	PRY	Paraguay	no	NA1	0	19203			62714.26279	0	0	0	0	0	0
258	PYF	French Polynesia	yes	OC	2.802259194	6568	32	4.9	4299.913703	1.958131311	14.30346873	3.972578655	0.455388514	3.326454836	0.923874042
634	QAT	Qatar	no	NI	0	113981	0		382000	0	0	0	0	0	0
642	ROU	Romania	no	ROW	0				661000	0	0	0	0	0	0
643	RUS	Russian Federation	no	ROW	8.793613396	2209139	2		5660000	0.063446334	0.068695147	0.012561551	1.12E-05	1.21E-05	2.22E-06
646	RWA	Rwanda	no	ROW	0	1558			14064.159	0	0	0	0	0	0
682	SAU	Saudi Arabia	no	NI	0	751807			1650000	0	0	0	0	0	0
729	SDN	Sudan	no	ROW	0	26851			15162.71868	0	0	0	0	0	0
686	SEN	Senegal	no	ROW	0	11619			44208.08542	0	0	0	0	0	0
702	SGP	Singapore	no	ROW	0	526900			821000	0	0	0	0	0	0
654	SHN	Saint Helena, Ascension and Tristan da Cunha	no	NA1	0				38.789164	0	0	0	0	0	0
90	SLB	Solomon Islands	yes	OC	2.981163392	211	0	0.7	846.8267413	0.111569791	0.745573141	0.220282263	0.131750434	0.88043174	0.26012672
694	SLE	Sierra Leone	no	ROW	0	523			5938.127723	0	0	0	0	0	0
222	SLV	El Salvador	no	NA1	67.84988545	22582	5	0.2	50320.46955	3.341648386	9.972584648	5.848308399	0.066407337	0.19818147	0.11622126
674	SMR	San Marino	no	ROW	0	1846			2230.701234	0	0	0	0	0	0
706	SOM	Somalia	no	NI	0.053593366	3573			8184.390566	0.007296752	0.02294139	0.009309401	0.000891545	0.002803066	0.001137458
666	SPM	Saint Pierre and Miquelon	no	ROW	0				268.530772	0	0	0	0	0	0
688	SRB	Serbia	no	ROW	0	16907			47169.39353	0	0	0	0	0	0
678	STP	Sao Tome and Principe	no	ROW	0	311			122.3703702	0	0	0	0	0	0
740	SUR	Suriname	no	NA1	0	2797	0	0	20141.83856	0	0	0	0	0	0
703	SVK	Slovakia	no	ROW	0	124390			307000	0	0	0	0	0	0
705	SVN	Slovenia	no	ROW	0	36896			202000	0	0	0	0	0	0
752	SWE	Sweden	no	ROW	0	369792			2230000	0	0	0	0	0	0
748	SWZ	Eswatini	no	SI	12.74484741	2012	0	0.1	18308.52252	0	0	0	0	0	0
534	SXM	Sint Maarten (Dutch part)	no	NA1	65.78947368				456.240392	8.457069485	17.26869015	12.43677438	18.53643306	37.84998096	27.25925762
690	SYC	Seychelles	no	ROW	0.247473264	2495	1	0.2	2229.880873	0	0	0	0	0	0
796	TCA	Turks and Caicos Islands	yes	NA1	23.83148435	332	4	10.5	788.25568	5.412610006	13.48208454	8.786169297	6.86656645	17.10369475	11.14634442
148	TCD	Chad	no	ROW	0	6664			17736.31237	0	0	0	0	0	0
768	TGO	Togo	no	ROW	0	1644			11266.34465	0	0	0	0	0	0
764	THA	Thailand	yes	WP1	88.81915853	394598	7	0	1110000	18.1160656	57.86903205	29.66754506	0.01632078	0.052134263	0.026727518
762	TJK	Tajikistan	no	NI	0.044138163	5576			203000	0	0	0	0	0	0
795	TKM	Turkmenistan	no	NI	0	12707			170000	0	0	0	0	0	0
626	TLS	Timor-Leste	no	OC	0				5045.584696	0	0	0	0	0	0
776	TON	Tonga	yes	OC	8.452328885	230	2	10.1	703.124033	7.051375716	28.40877357	12.06882673	10.02863703	40.40364465	17.16457718
780	TTO	Trinidad and Tobago	yes	NA1	0.063593872	31370	17	0.5	9878.870004	0.057979389	0.170407156	0.100878187	0.00586903	0.017249661	0.010211511
788	TUN	Tunisia	no	ROW	0	65420			133000	0	0	0	0	0	0
792	TUR	Turkey	no	ROW	0	1578228			1690000	0	0	0	0	0	0
798	TUV	Tuvalu	no	OC	0				46.5103124	0	0	0	0	0	0
158	TWN	Taiwan, Province of China	yes	WP4	307.7933529	872409	4441	5.1	2760000	75348.36862	7746.310137	2326.973836	27.30013356	2.806634108	0.843106462
834	TZA	Tanzania, United Republic of	no	SI	0	7854	0	0	134000	0	0	0	0	0	0
800	UGA	Uganda	no	NI	0	6628			57034.05053	0	0	0	0	0	0
804	UKR	Ukraine	no	ROW	2.457865292	278497			919000	0	0	0	0	0	0
858	URY	Uruguay	no	NA1	0	28590			177000	0	0	0	0	0	0
840	USA	United States of America	yes	NA2	19684.64732	22004154	11460	0.5	55600000	38965.07082	22101.13828	19117.91125	0.700810626	0.397502487	0.343847325
860	UZB	Uzbekistan	no	NI	0	44370			78659.78134	0	0	0	0	0	0
670	VCT	Saint Vincent and the Grenadines	yes	NA1	5.711364346	1047	2	1.5	849.3082074	2.166666284	5.465358934	3.544681375	2.551095427	6.435071375	4.173610174
862	VEN	Venezuela, Bolivarian Republic of	no	NA1	0.950994553	435869	66	0.2	1740000	48.11560311	121.462023	78.42844474	0.027652645	0.06980576	0.045073819
92	VGB	Virgin Islands, British	yes	NA1	79.26315789	424	3	6.9	623.62	10.79454138	19.24341315	14.76122633	17.30948556	30.85759462	23.67022598
850	VIR	Virgin Islands, U.S.	yes	NA1	36.09112396	1755	16	9.2	4517.50328	123.2873136	231.263397	174.0519453	27.29102913	51.19274578	38.52834951
704	VNM	Viet Nam	yes	WP1	624.6783202	115441	23	0.2	405000	532.5854677	1860.159256	897.3360555	1.315025846	4.592985817	2.215644581
548	VUT	Vanuatu	yes	OC	47.73236328	102	0	1.6	829.7375781	22.59630479	103.9856396	41.28133218	27.23307391	125.3235268	49.75227502
876	WLF	Wallis and Futuna	no	OC	0				74.8344	0.364839598	1.788792989	0.676351203	4.875292616	23.90335179	9.037971886
882	WSM	Samoa	yes	OC	81.76090927	361	3	6.8	2130.04148	16.68847133	64.86466994	29.10843521	7.83481049	30.45230365	13.6656659
887	YEM	Yemen	yes	NI	5.337269362	21556			76645.01712	3.151547032	9.671282903	4.007786796	0.041118747	0.1261828	0.052290246
710	ZAF	South Africa	no	SI	10.9841413	335148	11	0	841000	0	0	0	0	0	0
894	ZMB	Zambia	no	ROW	0	9806	0	0	90509.12581	0	0	0	0	0	0
716	ZWE	Zimbabwe	no	SI	4.366742824	4073	0	0	33251.25144	0.401177381	3.928521373	2.202593951	0.012065031	0.118146572	0.066240934
248	ALA	Åland Islands	no	ROW	0					0	0	0
10	ATA	Antarctica	no	ROW	0					0	0	0
260	ATF	French Southern Territories	no	ROW	0					0	0	0
535	BES	Bonaire, Sint Eustatius and Saba	no	ROW	0					0	0	0
74	BVT	Bouvet Island	no	ROW	0					0	0	0
166	CCK	Cocos (Keeling) Islands	no	ROW	0					0	0	0
162	CXR	Christmas Island	no	ROW	0					0	0	0
732	ESH	Western Sahara	no	ROW	0	2173				0	0	0
312	GLP	Guadeloupe	no	NA1	0	19838	192	9.7		0	0	0
254	GUF	French Guiana	no	NA1	0	8339	0	0		0	0	0
334	HMD	Heard Island and McDonald Islands	no	ROW	0					0	0	0
86	IOT	British Indian Ocean Territory	no	ROW	0					0	0	0
434	LBY	Libya	no	ROW	0	78903				0	0	0
474	MTQ	Martinique	no	NA1	0	21052	103	4.9		0	0	0
175	MYT	Mayotte	no	ROW	0	2341	8	3.3		0	0	0
612	PCN	Pitcairn	no	OC	0					0	0	0
275	PSE	Palestine, State of	no	ROW	0					0	0	0
638	REU	Réunion	no	ROW	0	42937	261	6.1		0	0	0
239	SGS	South Georgia and the South Sandwich Islands	no	ROW	0					0	0	0
744	SJM	Svalbard and Jan Mayen	no	ROW	0					0	0	0
728	SSD	South Sudan	no	ROW	0					0	0	0
760	SYR	Syrian Arab Republic	no	NI	0	68489				0	0	0
772	TKL	Tokelau	no	OC	0					0	0	0
581	UMI	United States Minor Outlying Islands	no	ROW	0					0	0	0
336	VAT	Holy See	no	ROW	0					0	0	0
983	XKX	Kosovo	no	ROW	0					0	0	0
