# Supplementary material for: Regional tropical cyclone impact functions for globally consistent risk assessments
Source: Copernicus journal article supplement (doi:10.5194/nhess-21-393-2021), 2021-01-29
Supplement: Supplementary file 1 [file nhess-21-393-2021-supplement.zip › Table_S4_matched_events_WP2_Philippines.csv]

country	country_id	region	year	name	EM_ID	ibtracsID	Reported_Damage	reference_year	Normalized_Reported_Damage	Simulated_Damage	v_half	Event_Damage_Ratio	log_ratio	unique_ID	Surge	Rain	Flood	Slide
PHL	608	WP2	2013	Haiyan (Yolanda)	2013-0433	2013306N07162	10000000000	2014	10468973696	1803815584	84.7	0.172301091	-1.758511806	2013-0433PHL	TRUE	FALSE	FALSE	FALSE
PHL	608	WP2	1988	Skip (Yoning)	1988-0506	1988308N09140	149060000	2014	1119695812	182189871.4	84.7	0.162713721	-1.815762938	1988-0506PHL	FALSE	FALSE	FALSE	FALSE
PHL	608	WP2	2012	Bopha	2012-0500	2012331N03157	898352000	2014	1022251732	1060346812	84.7	1.037265851	0.036588261	2012-0500PHL	FALSE	FALSE	FALSE	FALSE
PHL	608	WP2	2009	Pepeng (Parma)	2009-0422	2009270N10148	585379000	2014	989634942.4	22709945.78	84.7	0.022947801	-3.774533161	2009-0422PHL	FALSE	FALSE	TRUE	TRUE
PHL	608	WP2	1993	Flo (Kadiang)	1993-0077	1993271N14134	188000000	2014	984067975.5	120218438.7	84.7	0.122164771	-2.102384565	1993-0077PHL	FALSE	FALSE	FALSE	FALSE
PHL	608	WP2	1995	Angela (Rosing)	1995-0271	1995293N05177	244000000	2014	936840738.5	1.57E+11	84.7	167.320882	5.119913418	1995-0271PHL	FALSE	FALSE	FALSE	FALSE
PHL	608	WP2	1980	Betty (Aring)	1980-0099	1980296N05165	102300000	2014	897149786.7	173422364.8	84.7	0.193303691	-1.6434928	1980-0099PHL	FALSE	FALSE	FALSE	FALSE
PHL	608	WP2	1984	Agnes (Undang)	1984-0105	1984302N00149	96600000	2014	875268514.8	173628292.7	84.7	0.198371459	-1.617613948	1984-0105PHL	FALSE	FALSE	FALSE	FALSE
PHL	608	WP2	2014	Rammasun (Glenda)	2014-0227	2014190N08154	820576000	2014	820576000	39527536571	84.7	48.17047607	3.874746304	2014-0227PHL	FALSE	FALSE	TRUE	TRUE
PHL	608	WP2	1991	Ruth (Trining)	1991-0382	1991289N06156	90000000	2014	563936202.8	95056526.06	84.7	0.168559006	-1.780469404	1991-0382PHL	FALSE	FALSE	FALSE	FALSE
PHL	608	WP2	1987	Nina (Sisang)	1987-0212	1987320N03171	56000000	2014	480080890.5	5643083560	84.7	11.7544432	2.464231314	1987-0212PHL	FALSE	FALSE	FALSE	FALSE
PHL	608	WP2	2008	Fengshen (Franck)	2008-0249	2008169N08135	284694000	2014	465107740.1	9285700483	84.7	19.96462256	2.993961835	2008-0249PHL	FALSE	FALSE	TRUE	TRUE
PHL	608	WP2	2011	Pedring (Nesat)	2011-0379	2011266N13139	344173000	2014	436981179.1	171551572.5	84.7	0.392583435	-0.93500619	2011-0379PHL	FALSE	FALSE	FALSE	FALSE
PHL	608	WP2	1989	Gordon (Goring)	1989-0120	1989190N20160	61000000	2014	407741184.1	347444617.9	84.7	0.852120491	-0.160027341	1989-0120PHL	FALSE	FALSE	FALSE	FALSE
PHL	608	WP2	2009	Tropical Storm Ondoy (Ketsana)	2009-0414	2009268N14128	237489000	2014	401496146.7	842898.2771	84.7	0.002099393	-6.166106932	2009-0414PHL	FALSE	FALSE	TRUE	FALSE
PHL	608	WP2	1989	Dan (Saling)	1989-0125	1989279N07151	59200000	2014	395709477	20398391326	84.7	51.54890775	3.942531022	1989-0125PHL	FALSE	FALSE	FALSE	FALSE
PHL	608	WP2	2010	Megi (Juan)	2010-0543	2010285N13145	275745000	2014	393168267.4	525794088.3	84.7	1.337325852	0.290671987	2010-0543PHL	FALSE	FALSE	FALSE	FALSE
PHL	608	WP2	1986	Georgia (Ruping)	1986-0152	1986276N07177	36000000	2014	343006780.4	2492443.003	84.7	0.007266454	-4.92448686	1986-0152PHL	FALSE	FALSE	FALSE	FALSE
PHL	608	WP2	1994	Teresa (Katring)	1994-0519	1994287N14156	67400000	2014	299308082	17730999637	84.7	59.23996278	4.081596361	1994-0519PHL	FALSE	FALSE	TRUE	FALSE
PHL	608	WP2	1981	Irma (Anding)	1981-0101	1981319N07163	35000000	2014	279423828.6	304787641.2	84.7	1.090771831	0.086885548	1981-0101PHL	FALSE	FALSE	FALSE	FALSE
PHL	608	WP2	2006	Xangsane (Milenyo)	2006-0517	2006268N12129	113000000	2014	263136098.5	1.00E+11	84.7	381.6949715	5.944621786	2006-0517PHL	FALSE	FALSE	TRUE	TRUE
PHL	608	WP2	2001	Utor (Feria)	2001-0319	2001181N08141	68565000	2014	255861625.3	601016.0555	84.7	0.002348989	-6.053770402	2001-0319PHL	FALSE	FALSE	FALSE	FALSE
PHL	608	WP2	1989	Elsie (Tasing)	1989-0126	1989286N14137	35400000	2014	236623572.4	269580736.3	84.7	1.139280984	0.130397347	1989-0126PHL	FALSE	FALSE	FALSE	FALSE
PHL	608	WP2	1981	Lee (Dinang)	1981-0112	1981355N07149	26000000	2014	207571987	529859135	84.7	2.55265242	0.937132983	1981-0112PHL	FALSE	FALSE	FALSE	FALSE
PHL	608	WP2	2015	Koppu (Lando)	2015-0462	2015285N14151	210985000	2014	205083256.2	517723786.6	84.7	2.524456634	0.926025845	2015-0462PHL	FALSE	FALSE	TRUE	TRUE
PHL	608	WP2	1985	Hal (Kuring)	1985-0190	1985162N05154	20000000	2014	185189963.4	563433.5636	84.7	0.003042463	-5.795087979	1985-0190PHL	FALSE	FALSE	FALSE	FALSE
PHL	608	WP2	1994	Yunya (Norming)	1994-0071	1994197N14115	37600000	2014	166973054.6	2392987.277	84.7	0.014331578	-4.245289958	1994-0071PHL	FALSE	FALSE	FALSE	FALSE
PHL	608	WP2	2008	Halong (Cosme)	2008-0197	2008135N12116	99174000	2014	162021661.9	217992014.4	84.7	1.345449811	0.296728389	2008-0197PHL	FALSE	FALSE	TRUE	TRUE
PHL	608	WP2	2006	Durian (Reming)	2006-0648	2006329N06150	66400000	2014	154621565.9	3409580544	84.7	22.0511319	3.093363934	2006-0648PHL	FALSE	FALSE	TRUE	TRUE
PHL	608	WP2	2015	Melor (Nona)	2015-0543	2015344N07145	135217000	2014	131434664.3	2659766669	84.7	20.23641696	3.007483801	2015-0543PHL	FALSE	FALSE	TRUE	TRUE
PHL	608	WP2	1994	Axel (Garding)	1994-0594	1994345N06165	26813000	2014	119070439.2	110560443	84.7	0.928529732	-0.074152877	1994-0594PHL	FALSE	FALSE	TRUE	FALSE
PHL	608	WP2	2014	Hagupit (Ruby)	2014-0479	2014334N02156	113878000	2014	113878000	118037232.4	84.7	1.036523581	0.035872403	2014-0479PHL	FALSE	FALSE	TRUE	TRUE
PHL	608	WP2	2000	Bebinca (Seniang)	2000-0715	2000305N06136	31000000	2014	108879711.6	36725050123	84.7	337.2992965	5.820970656	2000-0715PHL	FALSE	FALSE	FALSE	FALSE
PHL	608	WP2	2013	Tropical storm Nari (SAnti)	2013-0430	2013282N14132	96723000	2014	101259054.3	883877426	84.7	8.728873009	2.166636267	2013-0430PHL	FALSE	FALSE	TRUE	FALSE
PHL	608	WP2	2016	Nina (Nock-Ten)	2016-0503	2016355N07146	103661000	2014	96757536.45	1991362714	84.7	20.58095717	3.024366239	2016-0503PHL	FALSE	FALSE	FALSE	FALSE
PHL	608	WP2	2003	Imbudo	2003-0346	2003196N04150	26468000	2014	89769325.95	302901523.2	84.7	3.37422076	1.216164412	2003-0346PHL	FALSE	FALSE	TRUE	FALSE
PHL	608	WP2	1993	Nell (Puring)	1993-0228	1993353N05159	17000000	2014	88984870.12	1264179304	84.7	14.20667696	2.653712062	1993-0228PHL	FALSE	FALSE	FALSE	FALSE
PHL	608	WP2	1988	Warren (Huaning)	1988-0312	1988193N09149	11516000	2014	86504877.06	1722121.603	84.7	0.019907798	-3.916643774	1988-0312PHL	FALSE	FALSE	FALSE	FALSE
PHL	608	WP2	2011	Topical storm Juaning (Nock-ten)	2011-0272	2011205N12130	63258000	2014	80315874.36	10447387.7	84.7	0.130078739	-2.039615324	2011-0272PHL	FALSE	FALSE	TRUE	TRUE
PHL	608	WP2	1987	Phillis (Trining)	1987-0240	1987343N05154	8500000	2014	72869420.88	63951497.35	84.7	0.877617752	-0.130544142	1987-0240PHL	FALSE	FALSE	FALSE	FALSE
PHL	608	WP2	2004	Mindulle (Igme)	2004-0309	2004174N14146	19667000	2014	61254763.09	36505.4785	84.7	0.000595961	-7.425334545	2004-0309PHL	FALSE	FALSE	TRUE	FALSE
PHL	608	WP2	1981	Daling	1981-0134	1981176N08150	7609000	2014	60746740.34	460068.7801	84.7	0.007573555	-4.883092703	1981-0134PHL	FALSE	FALSE	FALSE	FALSE
PHL	608	WP2	2000	Xangsane (Reming)	2000-0706	2000299N08139	17000000	2014	59708228.94	13974236349	84.7	234.0420508	5.455500803	2000-0706PHL	FALSE	FALSE	FALSE	FALSE
PHL	608	WP2	2008	Tropical storm Nuri (Karen)	2008-0369	2008229N13147	33870000	2014	55333794.03	1760856.451	84.7	0.031822442	-3.447583515	2008-0369PHL	FALSE	FALSE	FALSE	FALSE
PHL	608	WP2	1981	Clara	1981-0083	1981256N10150	6700000	2014	53489704.34	1801384.38	84.7	0.033677217	-3.390933724	1981-0083PHL	FALSE	FALSE	FALSE	FALSE
PHL	608	WP2	2009	Emong (Chanom)	2009-0165	2009123N10111	30342000	2014	51295833	423788486.2	84.7	8.261655215	2.111624957	2009-0165PHL	FALSE	FALSE	TRUE	TRUE
PHL	608	WP2	1982	Faye	1982-0093	1982227N09140	6500000	2014	49805902.91	316405731	84.7	6.352775726	1.84889184	1982-0093PHL	FALSE	FALSE	FALSE	FALSE
PHL	608	WP2	2011	Tropical storm Washi (Sendong)	2011-0519	2011346N03156	38082000	2014	48351024.81	5635267.218	84.7	0.116549075	-2.14944285	2011-0519PHL	FALSE	FALSE	TRUE	TRUE
PHL	608	WP2	1987	Cart (Ising)	1987-0239	1987219N08155	5600000	2014	48008089.05	118009317.8	84.7	2.458113207	0.899394067	1987-0239PHL	FALSE	FALSE	FALSE	FALSE
PHL	608	WP2	2011	Mina (Nanmadol)	2011-0341	2011233N12129	34452000	2014	43742174.96	6257099.384	84.7	0.143044999	-1.944596018	2011-0341PHL	FALSE	FALSE	FALSE	FALSE
PHL	608	WP2	1986	Narge (Aning)	1986-0153	1986343N05176	4000000	2014	38111864.49	2633763193	84.7	69.10612295	4.235643337	1986-0153PHL	FALSE	FALSE	FALSE	FALSE
PHL	608	WP2	1982	Emang	1982-0174	1982190N09148	4500000	2014	34481009.7	3504334.401	84.7	0.101630852	-2.286408126	1982-0174PHL	FALSE	FALSE	FALSE	FALSE
PHL	608	WP2	2013	Tropical storm Utor (Labuyo)	2013-0272	2013220N12137	32431000	2014	33951928.59	176258123.8	84.7	5.191402406	1.647003874	2013-0272PHL	FALSE	FALSE	FALSE	FALSE
PHL	608	WP2	2008	Neoguri (Ambo)	2008-0155	2008104N08128	16000000	2014	26139377.16	23591.02721	84.7	0.000902509	-7.010331723	2008-0155PHL	FALSE	FALSE	FALSE	FALSE
PHL	608	WP2	2009	Tropical storm Mirinae (Santi)	2009-0478	2009299N12153	15194000	2014	25686800.03	5644022521	84.7	219.7246257	5.392375061	2009-0478PHL	FALSE	FALSE	FALSE	TRUE
PHL	608	WP2	2006	Cimaron (Paeng)	2006-0600	2006298N12143	9077000	2014	21137047.49	581034278.7	84.7	27.48890445	3.313782449	2006-0600PHL	FALSE	FALSE	TRUE	TRUE
PHL	608	WP2	2014	Kalmaegi (Luis)	2014-0390	2014254N10142	19183000	2014	19183000	37282416.7	84.7	1.943513356	0.664497343	2014-0390PHL	FALSE	FALSE	TRUE	FALSE
PHL	608	WP2	2004	Muifa (Unding)	2004-0580	2004319N10134	6000000	2014	18687577.08	137785617.6	84.7	7.373113005	1.997840006	2004-0580PHL	FALSE	FALSE	FALSE	TRUE
PHL	608	WP2	2014	Tropical storm Jangmi (Seniang)	2014-0497	2014362N07130	17688000	2014	17688000	2636518.085	84.7	0.14905688	-1.903427304	2014-0497PHL	FALSE	FALSE	FALSE	TRUE
PHL	608	WP2	2003	Linfa (Chedeng)	2003-0258	2003144N16119	4000000	2014	13566469.09	229573.4302	84.7	0.016922121	-4.079133584	2003-0258PHL	FALSE	FALSE	TRUE	TRUE
PHL	608	WP2	2010	Conson (Basyang)	2010-0308	2010191N12138	8675000	2014	12369162.52	4053622357	84.7	327.7200336	5.792159688	2010-0308PHL	FALSE	FALSE	TRUE	FALSE
PHL	608	WP2	2008	Hagupit (Nina)	2008-0426	2008262N16142	7420000	2014	12122136.16	60949.64554	84.7	0.005027962	-5.292740455	2008-0426PHL	FALSE	FALSE	FALSE	TRUE
PHL	608	WP2	1993	Kyle	1993-0088	1993322N09137	2000000	2014	10468808.25	371405.2987	84.7	0.035477324	-3.338861557	1993-0088PHL	FALSE	FALSE	FALSE	FALSE
PHL	608	WP2	2007	Mitag (Mina)	2007-0576	2007324N10140	5000000	2014	9526803.663	8742115.605	84.7	0.917633649	-0.085957044	2007-0576PHL	FALSE	FALSE	TRUE	TRUE
PHL	608	WP2	2006	Chanchu (Caloy)	2006-0251	2006128N09138	3328000	2014	7749707.397	227707267.9	84.7	29.38269231	3.380405804	2006-0251PHL	FALSE	FALSE	TRUE	TRUE
PHL	608	WP2	1988	Tess (Welpring)	1988-0557	1988306N15130	940000	2014	7061009.416	11032.28157	84.7	0.001562423	-6.461517634	1988-0557PHL	FALSE	FALSE	FALSE	FALSE
PHL	608	WP2	2007	Kabayan (Peipah)	2007-0560	2007306N18133	2971000	2014	5660826.737	78225079.99	84.7	13.81866707	2.626020364	2007-0560PHL	FALSE	FALSE	FALSE	FALSE
PHL	608	WP2	2013	Krosa (Vinta)	2013-0437	2013301N13142	4729000	2014	4950777.661	36433365.06	84.7	7.359119628	1.99594031	2013-0437PHL	FALSE	FALSE	TRUE	FALSE
PHL	608	WP2	2016	Ferdie (Meranti)	2016-0342	2016253N13144	4913000	2014	4585811.217	5851.789539	84.7	0.001276064	-6.663974779	2016-0342PHL	FALSE	FALSE	FALSE	FALSE
PHL	608	WP2	2012	Kai-Tak	2012-0294	2012225N16133	3000000	2014	3413756.742	13121.35062	84.7	0.003843669	-5.561327926	2012-0294PHL	FALSE	FALSE	FALSE	FALSE
PHL	608	WP2	2011	Quiel (Nalgae)	2011-0378	2011270N18139	2655000	2014	3370935.635	576605108.8	84.7	171.0519486	5.141967303	2011-0378PHL	FALSE	FALSE	FALSE	TRUE
PHL	608	WP2	2004	Nida (Dindo)	2004-0218	2004134N07132	1000000	2014	3114596.181	26179685.73	84.7	8.405483155	2.128884249	2004-0218PHL	FALSE	FALSE	FALSE	TRUE
PHL	608	WP2	1980	Ditang	1980-0133	1980126N08150	289000	2014	2534470.072	1085476.617	84.7	0.428285435	-0.847965401	1980-0133PHL	FALSE	FALSE	FALSE	FALSE
PHL	608	WP2	1989	Hunt (Unsing)	1989-0132	1989314N10152	325000	2014	2172391.554	210240657.9	84.7	96.77843641	4.572424205	1989-0132PHL	FALSE	FALSE	FALSE	FALSE
PHL	608	WP2	2015	Tropical cyclone Linfa (Egay)	2015-0278	2015183N13130	2218000	2014	2155957.354	155710.4841	84.7	0.07222336	-2.62799174	2015-0278PHL	FALSE	FALSE	FALSE	TRUE
PHL	608	WP2	2007	Hagibis (Lando)	2007-0578	2007323N09128	1000000	2014	1905360.733	1189032.438	84.7	0.62404584	-0.471531453	2007-0578PHL	FALSE	FALSE	TRUE	TRUE
PHL	608	WP2	2012	Son Tinh (Ofel)	2012-0406	2012296N06135	1339000	2014	1523673.426	4810383.666	84.7	3.157096255	1.149652698	2012-0406PHL	FALSE	FALSE	TRUE	TRUE
PHL	608	WP2	1981	Yeyeng	1981-0138	1981317N14153	167000	2014	1333250.839	603736756.5	84.7	452.8305843	6.11551807	1981-0138PHL	FALSE	FALSE	FALSE	FALSE
PHL	608	WP2	2015	Mujigae	2015-0490	2015273N12130	1300000	2014	1263635.96	59324.62665	84.7	0.046947561	-3.058724018	2015-0490PHL	FALSE	FALSE	FALSE	FALSE
PHL	608	WP2	2013	Rumbia	2013-0258	2013178N09133	1000000	2014	1046897.37	68264331.18	84.7	65.20632598	4.177556489	2013-0258PHL	FALSE	FALSE	FALSE	FALSE
PHL	608	WP2	2015	Tropical storm Amang (Mekkhala)	2015-0017	2015012N09146	1000000	2014	972027.6618	2596001.641	84.7	2.670707576	0.982343447	2015-0017PHL	FALSE	FALSE	TRUE	TRUE
PHL	608	WP2	2015	Noul (Dodong)	2015-0176	2015122N07144	348000	2014	338265.6263	7568413.609	84.7	22.3741729	3.107907298	2015-0176PHL	FALSE	FALSE	FALSE	FALSE
PHL	608	WP2	1982	Aning	1982-0176	1982325N08176	5000	2014	38312.233	14021784.89	84.7	365.9871479	5.902598218	1982-0176PHL	FALSE	FALSE	FALSE	FALSE
